# Supplementary material for: New Securinega alkaloids with anti-HIV activity from Flueggea virosa
Source: Royal Society of Chemistry journal article supplement (doi:10.1039/c5ra22191a), 2015-01-01
Supplement: c5ra22191a1.pdf [file c5ra22191a1.pdf]

## Electronic supplementary information for

### New *Securinega* alkaloids with anti-HIV activity from *Flueggea virosa*

Hua Zhang,<sup>†,a</sup> Chuan-Rui Zhang,<sup>†,a</sup> Ying-Shan Han,<sup>b</sup> Mark A. Wainberg,<sup>b</sup> and Jian-Min Yue<sup>\*,a</sup>

<sup>a</sup>State Key Laboratory of Drug Research, Shanghai Institute of Materia Medica, Chinese Academy of Sciences, 555 Zuchongzhi Road, Zhangjiang Hi-Tech Park, Shanghai 201203, P. R. China

<sup>b</sup>McGill University Aids Centre, The Lady Davis Institute for Medical Research, Jewish General Hospital, 3755 Cote Ste-Catherine Road, Montreal, Quebec H3T 1E2, Canada

**Table S1.** NMR data comparison of alkaloid **3** with virosecurinine and flueggenine A in CDCl<sub>3</sub>.

**Figure Sa.** Key 2D NMR correlations for alkaloids **5–8**.

**Figure Sb.** CD spectra for alkaloids **1, 2** and **4–9**.

**Figure S1.** <sup>1</sup>H NMR spectrum for flueggenine E (**1**) in CDCl<sub>3</sub>.

**Figure S2.** <sup>13</sup>C NMR spectrum for flueggenine E (**1**) in CDCl<sub>3</sub>.

**Figure S3.** <sup>1</sup>H–<sup>1</sup>H COSY spectrum for flueggenine E (**1**) in CDCl<sub>3</sub>.

**Figure S4.** HSQC spectrum for flueggenine E (**1**) in CDCl<sub>3</sub>.

**Figure S5.** HMBC spectrum for flueggenine E (**1**) in CDCl<sub>3</sub>.

**Figure S6.** ROESY spectrum for flueggenine E (**1**) in CDCl<sub>3</sub>.

**Figure S7.** IR spectrum for flueggenine E (**1**).

**Figure S8.** (+)-ESIMS spectrum for flueggenine E (**1**).

**Figure S9.** (+)-HRESIMS spectrum for flueggenine E (**1**).

**Figure S10.** <sup>1</sup>H NMR spectrum for flueggenine F (**2**) in CDCl<sub>3</sub>.

**Figure S11.** <sup>13</sup>C NMR spectrum for flueggenine F (**2**) in CDCl<sub>3</sub>.

**Figure S12.** <sup>1</sup>H–<sup>1</sup>H COSY spectrum for flueggenine F (**2**) in CDCl<sub>3</sub>.

**Figure S13.** HSQC spectrum for flueggenine F (**2**) in CDCl<sub>3</sub>.

**Figure S14.** HMBC spectrum for flueggenine F (**2**) in CDCl<sub>3</sub>.

**Figure S15.** ROESY spectrum for flueggenine F (**2**) in CDCl<sub>3</sub>.

**Figure S16.** IR spectrum for flueggenine F (**2**).

**Figure S17.** (+)-ESIMS spectrum for flueggenine F (**2**).

**Figure S18.** (+)-HRESIMS spectrum for flueggenine F (**2**).

**Figure S19.** <sup>1</sup>H NMR spectrum for flueggenine G (**3**) in CDCl<sub>3</sub>.

**Figure S20.** <sup>13</sup>C NMR spectrum for flueggenine G (**3**) in CDCl<sub>3</sub>.

**Figure S21.** <sup>1</sup>H–<sup>1</sup>H COSY spectrum for flueggenine G (**3**) in CDCl<sub>3</sub>.

---

<sup>†</sup> Equal contribution. \*Corresponding author. Tel.: 86-21-50806718; E-mail: jmyue@simm.ac.cn

**Figure S22.** HSQC spectrum for flueggenine G (**3**) in CDCl<sub>3</sub>.  
**Figure S23.** HMBC spectrum for flueggenine G (**3**) in CDCl<sub>3</sub>.  
**Figure S24.** ROESY spectrum for flueggenine G (**3**) in CDCl<sub>3</sub>.  
**Figure S25.** IR spectrum for flueggenine G (**3**).  
**Figure S26.** EIMS spectrum for flueggenine G (**3**).  
**Figure S27.** HREIMS spectrum for flueggenine G (**3**).

**Figure S28.** <sup>1</sup>H NMR spectrum for flueggenine H (**4**) in CDCl<sub>3</sub> (5% CD<sub>3</sub>OD).  
**Figure S29.** <sup>13</sup>C NMR spectrum for flueggenine H (**4**) in CDCl<sub>3</sub> (5% CD<sub>3</sub>OD).  
**Figure S30.** <sup>1</sup>H-<sup>1</sup>H COSY spectrum for flueggenine H (**4**) in CDCl<sub>3</sub> (5% CD<sub>3</sub>OD).  
**Figure S31.** HSQC spectrum for flueggenine H (**4**) in CDCl<sub>3</sub> (5% CD<sub>3</sub>OD).  
**Figure S32.** HMBC spectrum for flueggenine H (**4**) in CDCl<sub>3</sub> (5% CD<sub>3</sub>OD).  
**Figure S33.** ROESY spectrum for flueggenine H (**4**) in CDCl<sub>3</sub> (5% CD<sub>3</sub>OD).  
**Figure S34.** IR spectrum for flueggenine H (**4**).  
**Figure S35.** (+)-ESIMS spectrum for flueggenine H (**4**).  
**Figure S36.** (+)-HRESIMS spectrum for flueggenine H (**4**).

**Figure S37.** <sup>1</sup>H NMR spectrum for flueggenine I (**5**) in CDCl<sub>3</sub>.  
**Figure S38.** <sup>13</sup>C NMR spectrum for flueggenine I (**5**) in CDCl<sub>3</sub>.  
**Figure S39.** <sup>1</sup>H-<sup>1</sup>H COSY spectrum for flueggenine I (**5**) in CDCl<sub>3</sub>.  
**Figure S40.** HSQC spectrum for flueggenine I (**5**) in CDCl<sub>3</sub>.  
**Figure S41.** HMBC spectrum for flueggenine I (**5**) in CDCl<sub>3</sub>.  
**Figure S42.** ROESY spectrum for flueggenine I (**5**) in CDCl<sub>3</sub>.  
**Figure S43.** IR spectrum for flueggenine I (**5**).  
**Figure S44.** (+)-ESIMS spectrum for flueggenine I (**5**).  
**Figure S45.** (+)-HRESIMS spectrum for flueggenine I (**5**).

**Figure S46.** <sup>1</sup>H NMR spectrum for flueviroisine E (**6**) in CDCl<sub>3</sub>.  
**Figure S47.** <sup>13</sup>C NMR spectrum for flueggenine E (**6**) in CDCl<sub>3</sub>.  
**Figure S48.** <sup>1</sup>H-<sup>1</sup>H COSY spectrum for flueggenine E (**6**) in CDCl<sub>3</sub>.  
**Figure S49.** HSQC spectrum for flueggenine E (**6**) in CDCl<sub>3</sub>.  
**Figure S50.** HMBC spectrum for flueggenine E (**6**) in CDCl<sub>3</sub>.  
**Figure S51.** ROESY spectrum for flueggenine E (**6**) in CDCl<sub>3</sub>.  
**Figure S52.** IR spectrum for flueggenine E (**6**).  
**Figure S53.** (+)-ESIMS spectrum for flueggenine E (**6**).  
**Figure S54.** (+)-HRESIMS spectrum for flueggenine E (**6**).

**Figure S55.** <sup>1</sup>H NMR spectrum for flueviroisine F (**7**) in CDCl<sub>3</sub>.  
**Figure S56.** <sup>13</sup>C NMR spectrum for flueggenine F (**7**) in CDCl<sub>3</sub>.  
**Figure S57.** <sup>1</sup>H-<sup>1</sup>H COSY spectrum for flueggenine F (**7**) in CDCl<sub>3</sub>.  
**Figure S58.** HSQC spectrum for flueggenine F (**7**) in CDCl<sub>3</sub>.  
**Figure S59.** HMBC spectrum for flueggenine F (**7**) in CDCl<sub>3</sub>.  
**Figure S60.** ROESY spectrum for flueggenine F (**7**) in CDCl<sub>3</sub>.  
**Figure S61.** IR spectrum for flueggenine F (**7**).  
**Figure S62.** (+)-ESIMS spectrum for flueggenine F (**7**).  
**Figure S63.** (+)-HRESIMS spectrum for flueggenine F (**7**).

**Figure S64.**  $^1\text{H}$  NMR spectrum for flueviroisine G (**8**) in  $\text{CDCl}_3$ .  
**Figure S65.**  $^{13}\text{C}$  NMR spectrum for flueggenine G (**8**) in  $\text{CDCl}_3$ .  
**Figure S66.**  $^1\text{H}$ - $^1\text{H}$  COSY spectrum for flueggenine G (**8**) in  $\text{CDCl}_3$ .  
**Figure S67.** HSQC spectrum for flueggenine G (**8**)  $\text{CDCl}_3$ .  
**Figure S68.** HMBC spectrum for flueggenine G (**8**) in  $\text{CDCl}_3$ .  
**Figure S69.** ROESY spectrum for flueggenine G (**8**) in  $\text{CDCl}_3$ .  
**Figure S70.** IR spectrum for flueggenine G (**8**).  
**Figure S71.** (+)-ESIMS spectrum for flueggenine G (**8**).  
**Figure S72.** (+)-HRESIMS spectrum for flueggenine G (**8**).

**Figure S73.**  $^1\text{H}$  NMR spectrum for flueviroisine H (**9**) in  $\text{CDCl}_3$ .  
**Figure S74.**  $^{13}\text{C}$  NMR spectrum for flueggenine H (**9**) in  $\text{CDCl}_3$ .  
**Figure S75.**  $^1\text{H}$ - $^1\text{H}$  COSY spectrum for flueggenine H (**9**) in  $\text{CDCl}_3$ .  
**Figure S76.** HSQC spectrum for flueggenine H (**9**)  $\text{CDCl}_3$ .  
**Figure S77.** HMBC spectrum for flueggenine H (**9**) in  $\text{CDCl}_3$ .  
**Figure S78.** ROESY spectrum for flueggenine H (**9**) in  $\text{CDCl}_3$ .  
**Figure S79.** IR spectrum for flueggenine H (**9**).  
**Figure S80.** (+)-ESIMS spectrum for flueggenine H (**9**).  
**Figure S81.** (+)-HRESIMS spectrum for flueggenine H (**9**).

**Table S1.** NMR data comparison of alkaloid **3** with virosecurinine and fluggenine A in CDCl<sub>3</sub>.

| No. | <b>3</b>          |                                                          | <b>Virosecurinine<sup>a</sup></b> |                                          | <b>fluggenine A<sup>b</sup></b> |                                                                      |
|-----|-------------------|----------------------------------------------------------|-----------------------------------|------------------------------------------|---------------------------------|----------------------------------------------------------------------|
|     | $\delta_C$        | $\delta_H$ (multi., <i>J</i> in Hz)                      | $\delta_C$                        | $\delta_H$ (multi., <i>J</i> in Hz)      | $\delta_C$                      | $\delta_H$ (multi., <i>J</i> in Hz)                                  |
| 2   | 63.2              | 2.04 (dd, 11.3, 2.6)                                     | 63.0                              | 2.09 (dd, 11.0, 2.0)                     |                                 |                                                                      |
| 3   | 27.0              | a 1.67 (m)<br>b 1.57 (m)                                 | 27.2                              | a 1.65–1.48 (m)<br>b 1.65–1.48 (m)       |                                 |                                                                      |
| 4   | 24.3              | a 1.88 (m)<br>b 1.22 (m)                                 | 24.5                              | a 1.87 (m)<br>b 1.26–1.17 (m)            |                                 |                                                                      |
| 5   | 25.6              | 1.56–1.64 (m, 2H)                                        | 25.9                              | 1.65–1.48 (m)<br>1.65–1.48 (m)           |                                 |                                                                      |
| 6   | 48.9              | a 2.99 (m)<br>b 2.41 (m)                                 | 48.8                              | a 2.95 (dt, 10.5, 4.0)<br>b 2.41 (m)     |                                 |                                                                      |
| 7   | 58.5              | 3.85 (dd, 5.6, 4.1)                                      | 58.8                              | 3.80 (t, 4.5)                            |                                 |                                                                      |
| 8   | 42.2              | a 2.50 (dd, 9.1, 4.1)<br>b 1.72 (d, 9.1)                 | 42.3                              | a 2.49 (dd, 9.0, 4.0)<br>b 1.76 (d, 9.0) |                                 |                                                                      |
| 9   | 89.7              |                                                          | 89.5                              |                                          |                                 |                                                                      |
| 11  | 173.2             |                                                          | 173.7                             |                                          |                                 |                                                                      |
| 12  | 103.6             | 5.56 (s)                                                 | 105.1                             | 5.53 (s)                                 |                                 |                                                                      |
| 13  | 171.8             |                                                          | 170.1                             |                                          |                                 |                                                                      |
| 14  | 134.7             |                                                          | 121.4                             | 6.58 (d, 9.0)                            |                                 |                                                                      |
| 15  | 135.4             | 6.67 (d, 5.6)                                            | 140.2                             | 6.40 (dd, 9.5, 5.5)                      |                                 |                                                                      |
|     |                   |                                                          |                                   |                                          |                                 | dihydronorsecurinine moiety                                          |
| 2'  | 67.0              | 3.10 (dd, 8.7, 7.0)                                      |                                   |                                          | 66.7                            | 3.12 (m)                                                             |
| 3'  | 29.0 <sup>c</sup> | a 1.92 (m)<br>b 1.79 (m)                                 |                                   |                                          | 29.0                            | a 1.90 (m)<br>b 1.73 (m)                                             |
| 4'  | 26.6              | a 1.96 (m)<br>b 1.63 (m)                                 |                                   |                                          | 26.5                            | a 1.93 (m)<br>b 1.69 (m)                                             |
| 5'  | 57.5              | a 3.22 (m)<br>b 2.60 (m)                                 |                                   |                                          | 57.6                            | a 3.25 (m)<br>b 2.53 (m)                                             |
| 7'  | 65.0              | 3.01 (m)                                                 |                                   |                                          | 64.3                            | 3.20 (d, 5.6)                                                        |
| 8'  | 35.8              | a 2.59 (m)<br>b 1.49 (d, 11.0)                           |                                   |                                          | 35.4                            | a 2.61 (dd, 11.1, 5.6)<br>b 1.50 (d, 11.1)                           |
| 9'  | 91.9              |                                                          |                                   |                                          | 91.7                            |                                                                      |
| 11' | 172.6             |                                                          |                                   |                                          | 172.6                           |                                                                      |
| 12' | 110.2             | 5.67 (d, 2.1)                                            |                                   |                                          | 110.4                           | 5.69 (d, 2.0)                                                        |
| 13' | 172.8             |                                                          |                                   |                                          | 172.2                           |                                                                      |
| 14' | 29.1 <sup>c</sup> | $\alpha$ 2.97 (m)<br>$\beta$ 2.66 (ddd, 15.0, 11.8, 2.1) |                                   |                                          | 27.3                            | $\alpha$ 2.90 (dd, 15.5, 5.5)<br>$\beta$ 2.75 (ddd, 15.5, 12.1, 2.0) |
| 15' | 42.9              | 2.53 (m)                                                 |                                   |                                          | 42.8                            | 2.54 (m)                                                             |

<sup>a</sup> Wu, H. Y.; Zhou, J. Y. *Zhongguo Zhongyao Zazhi* **2004**, *29*, 535–536.

<sup>b</sup> Zhang, H.; Zhang, C. R.; Zhu, K. K.; Gao, A. H.; Luo, C.; Li, J.; Yue, J. M. *Org. Lett.* **2013**, *15*, 120–123.

<sup>c</sup> Interchangeable assignments.



**Figure Sa.** Key 2D NMR correlations for alkaloids **5–8**.

COSY —  
HMBC ↷

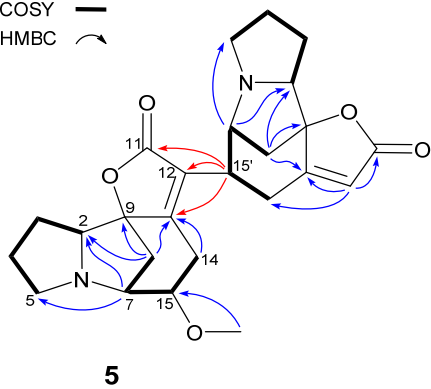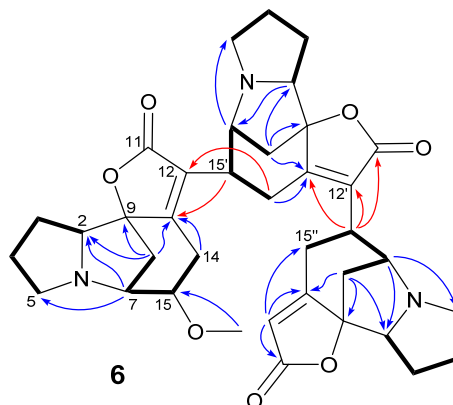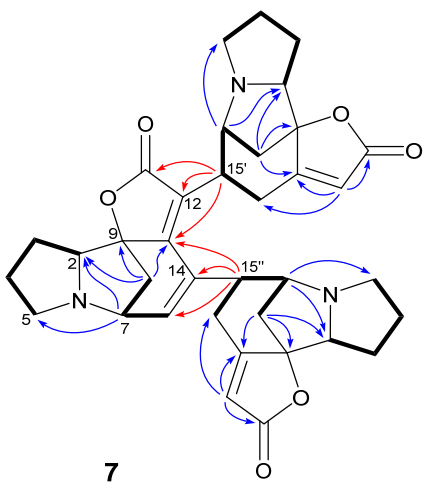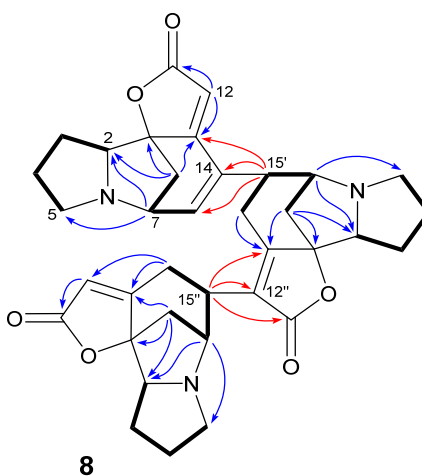

Figure Sb. CD spectra for alkaloids 1, 2 and 4-9.

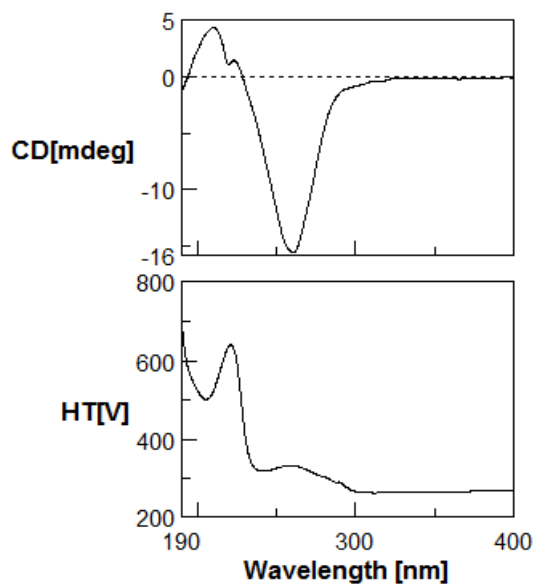

Alkaloid 1

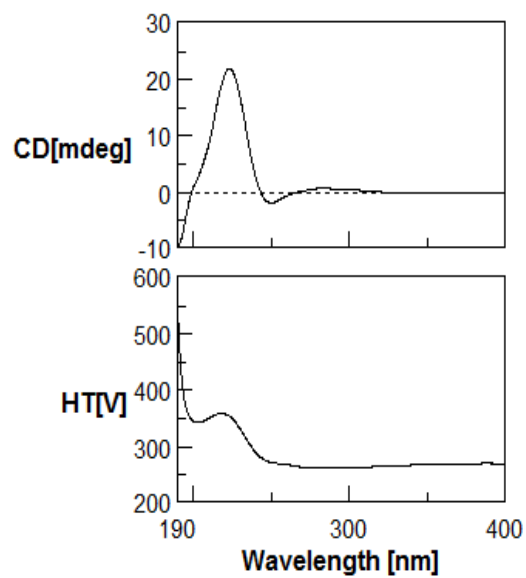

Alkaloid 2

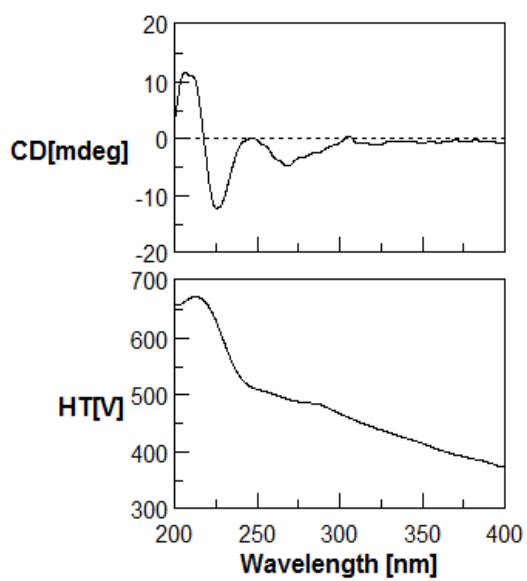

Alkaloid 4

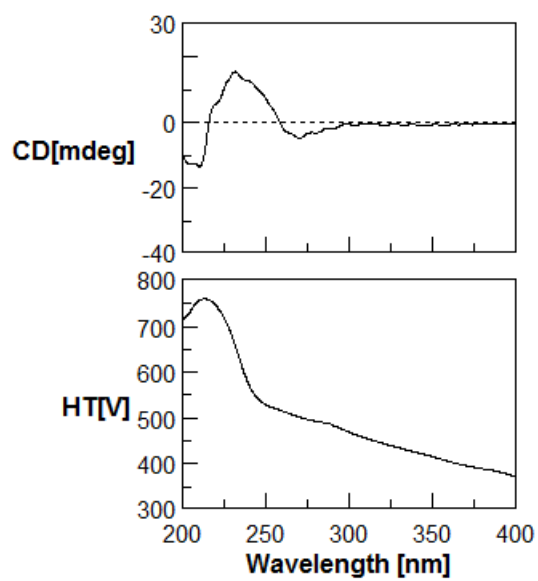

Alkaloid 5

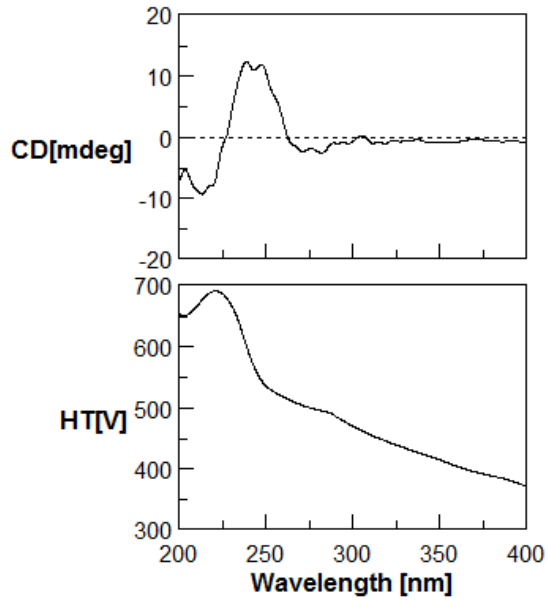

Alkaloid 6

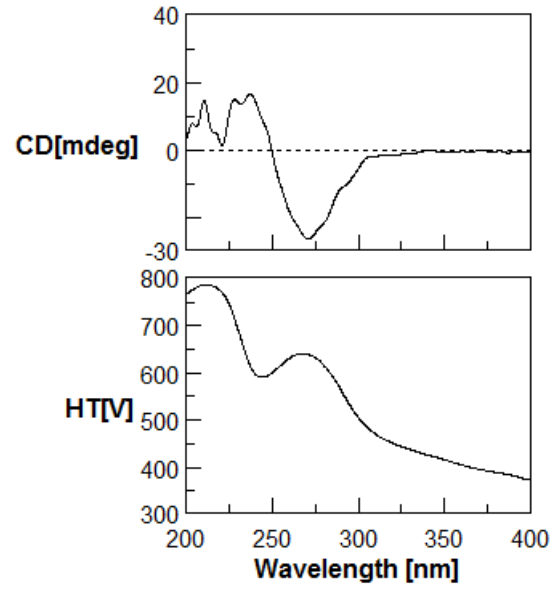

Alkaloid 7

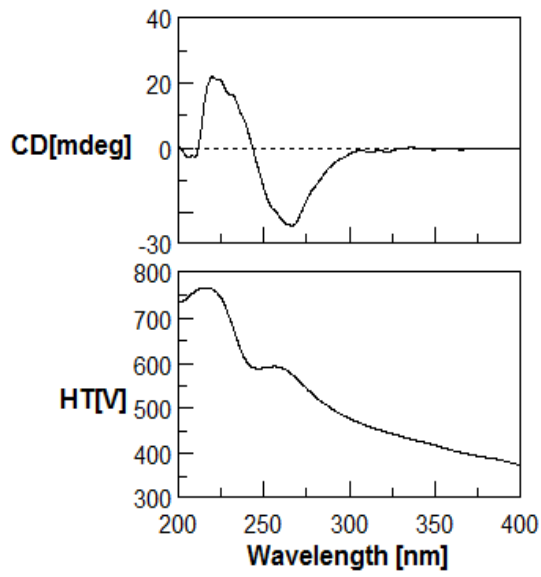

Alkaloid 8

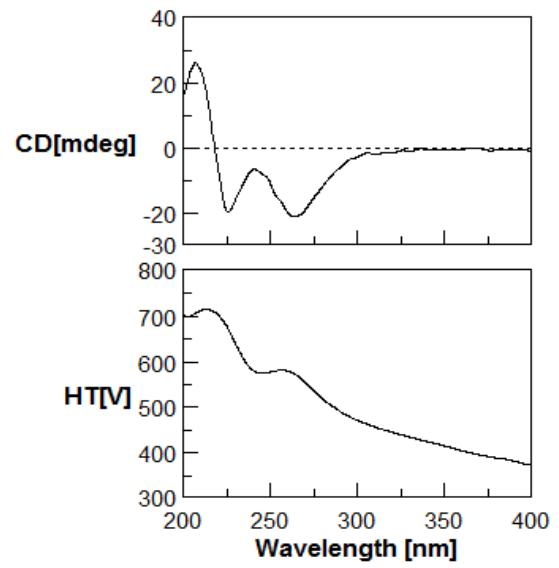

Alkaloid 9

**Figure S1.**  $^1\text{H}$  NMR spectrum for flueggeine E (**1**) in  $\text{CDCl}_3$ .

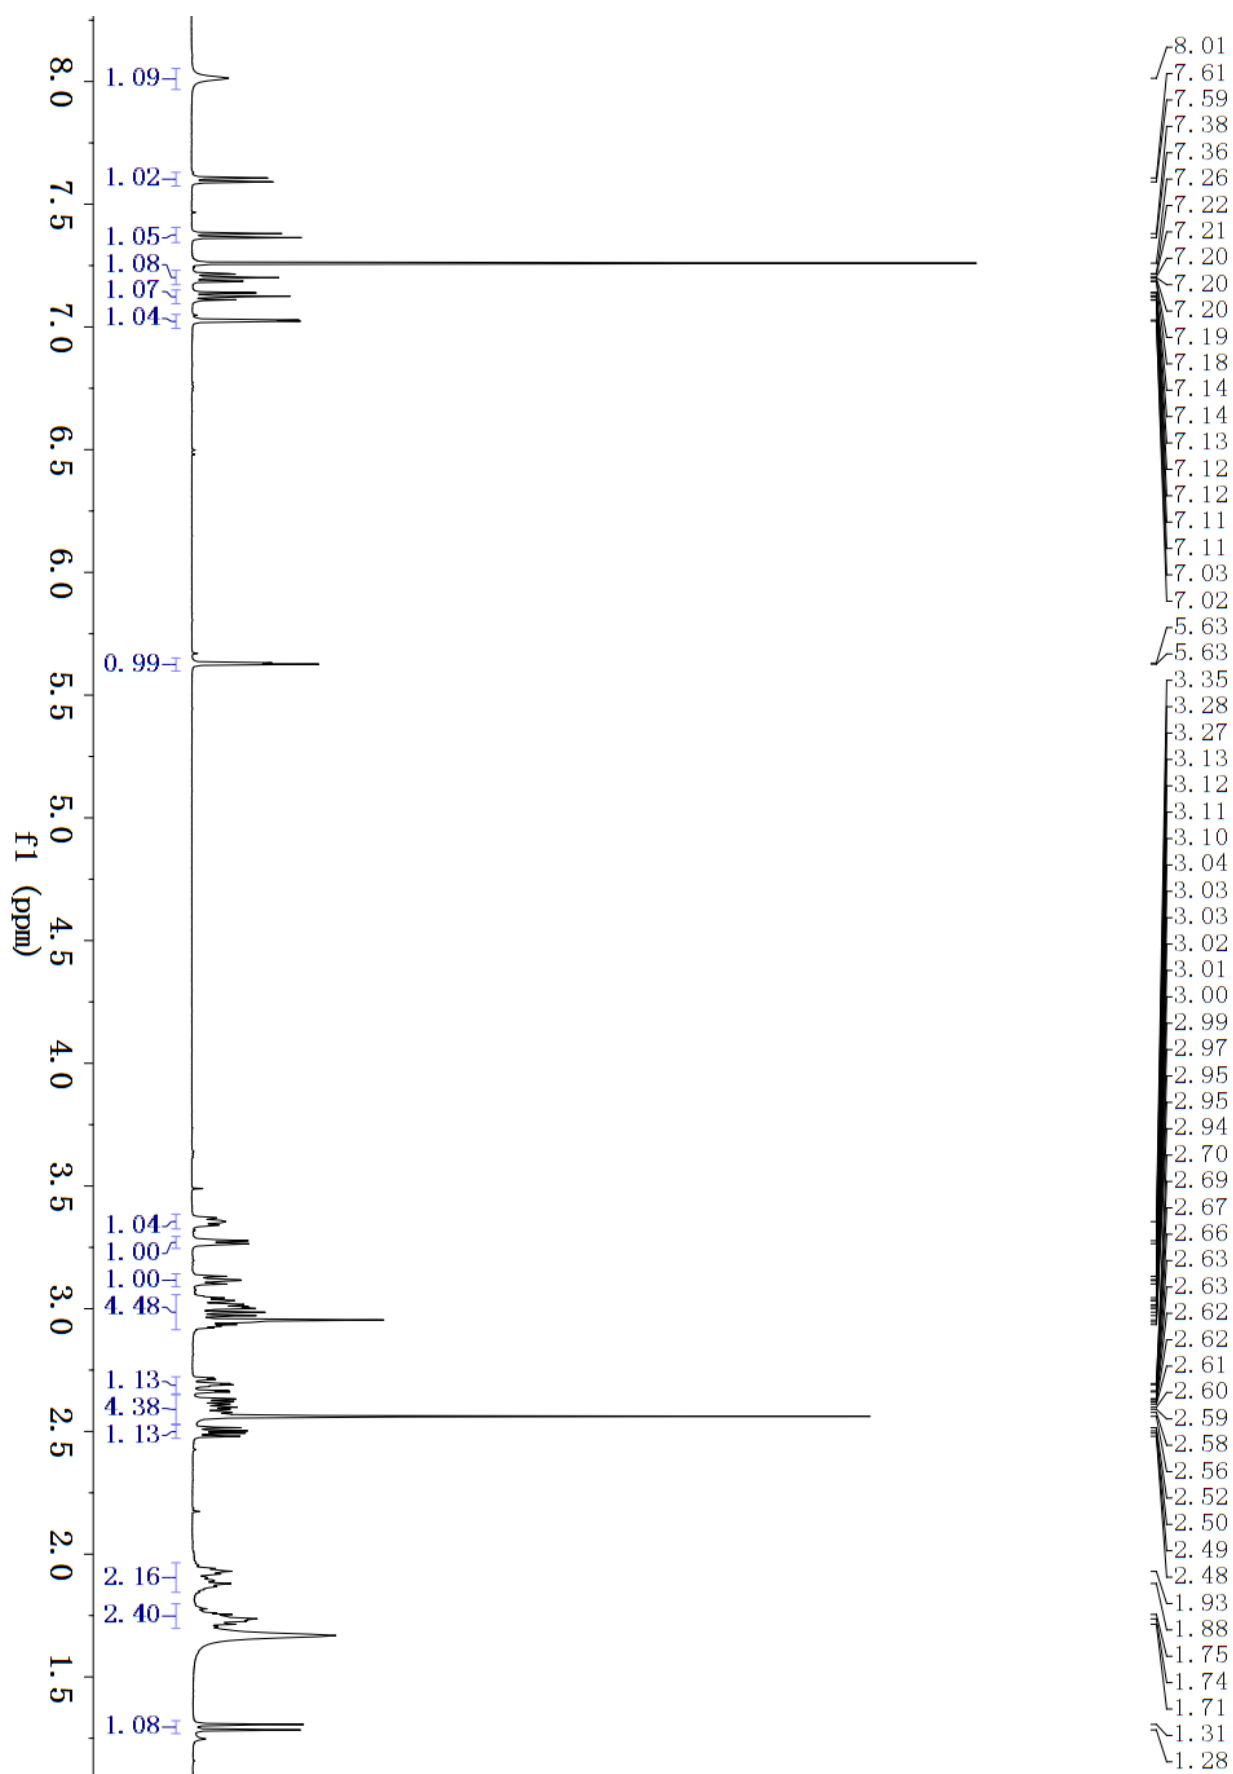

Figure S2.  $^{13}\text{C}$  NMR spectrum for flueggeanine E (**1**) in  $\text{CDCl}_3$ .

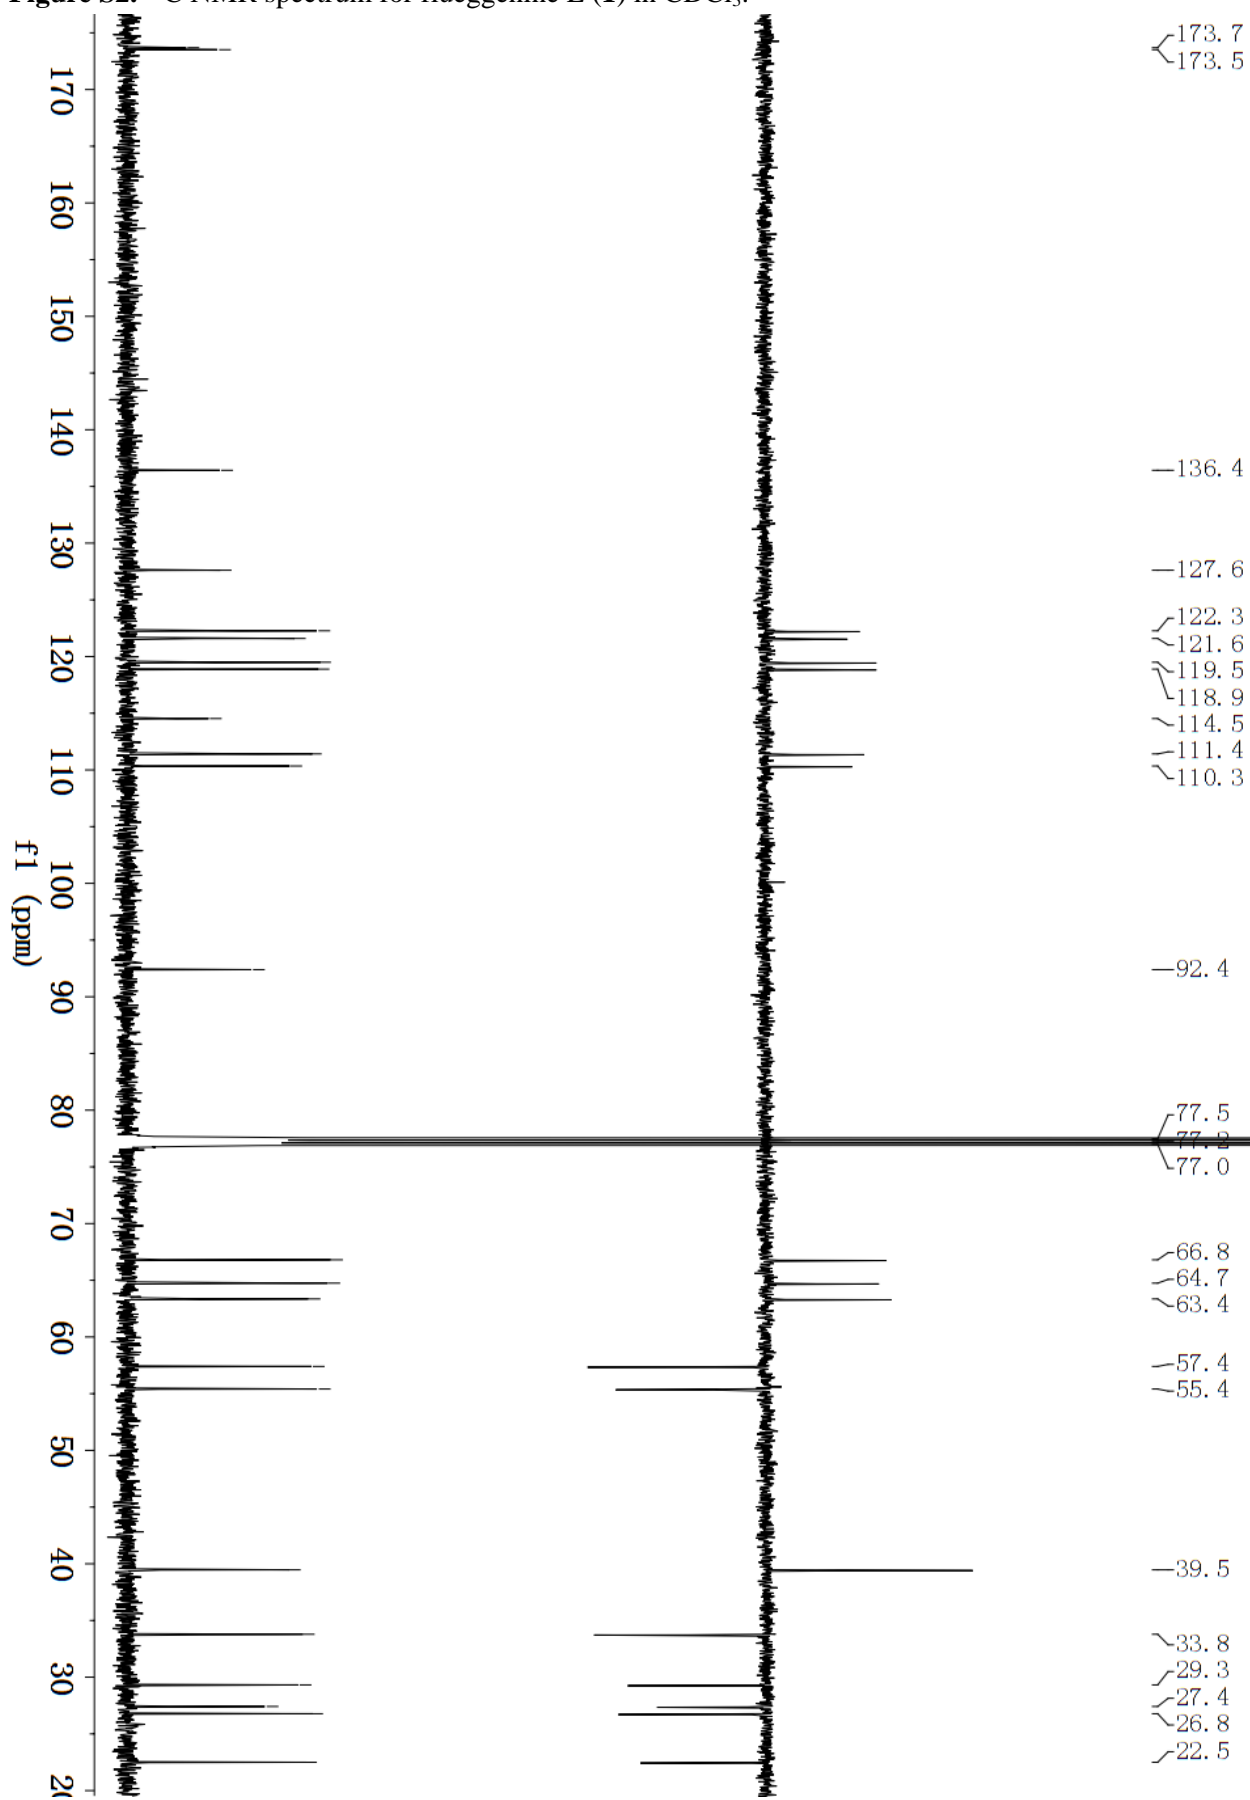

**Figure S3.**  $^1\text{H}$ - $^1\text{H}$  COSY spectrum for flueggenine E (**1**) in  $\text{CDCl}_3$ .

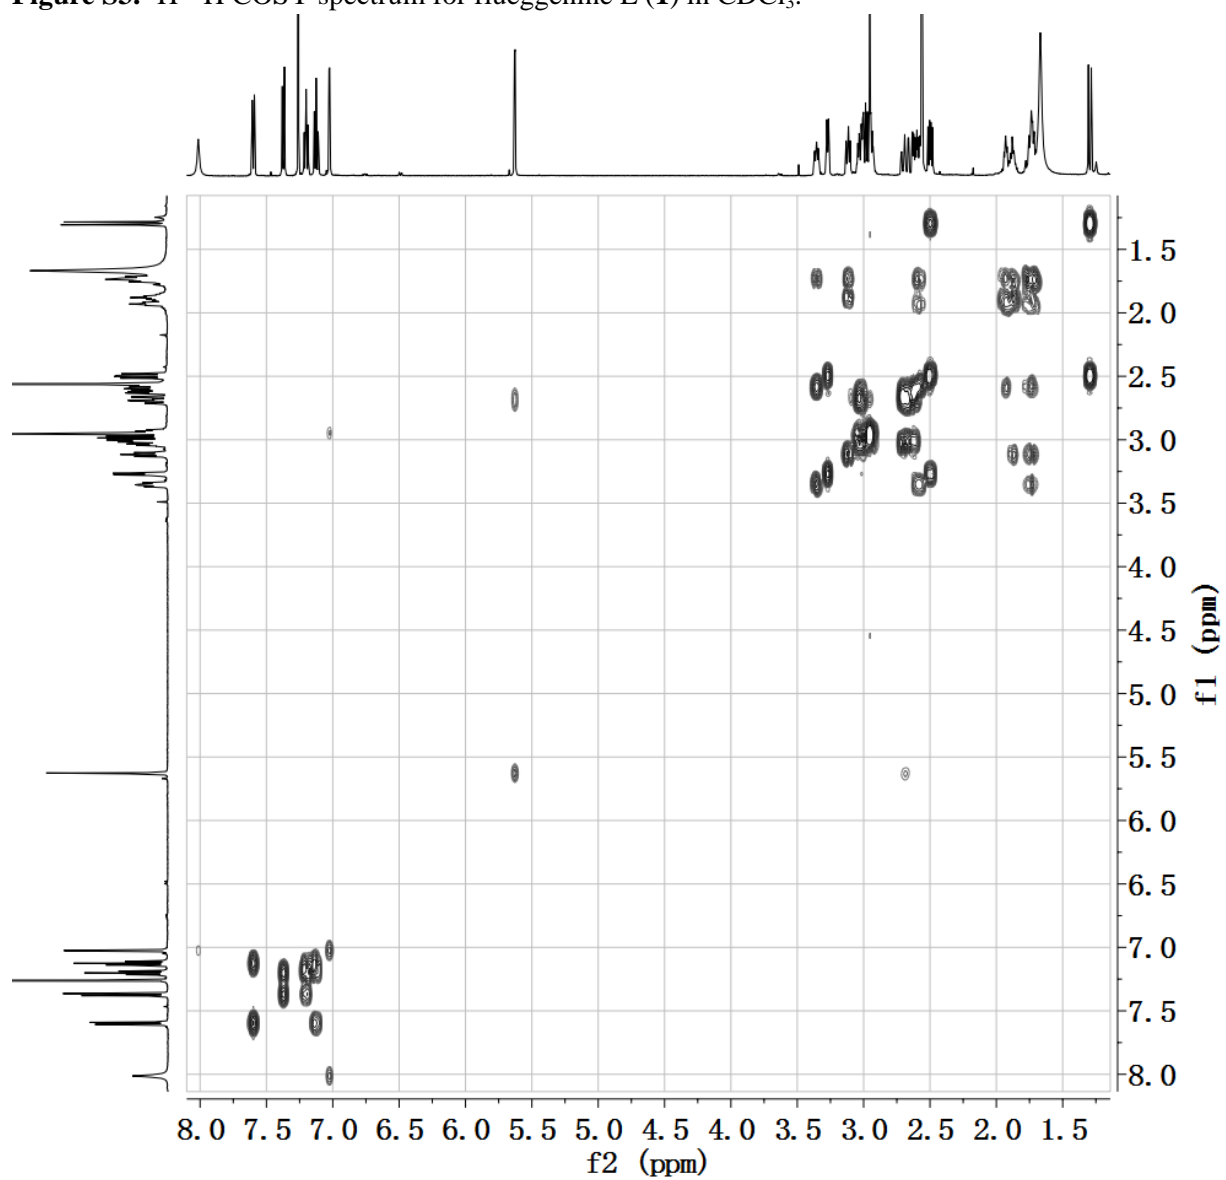

Figure S4. HSQC spectrum for flueggeine E (1) in CDCl<sub>3</sub>.

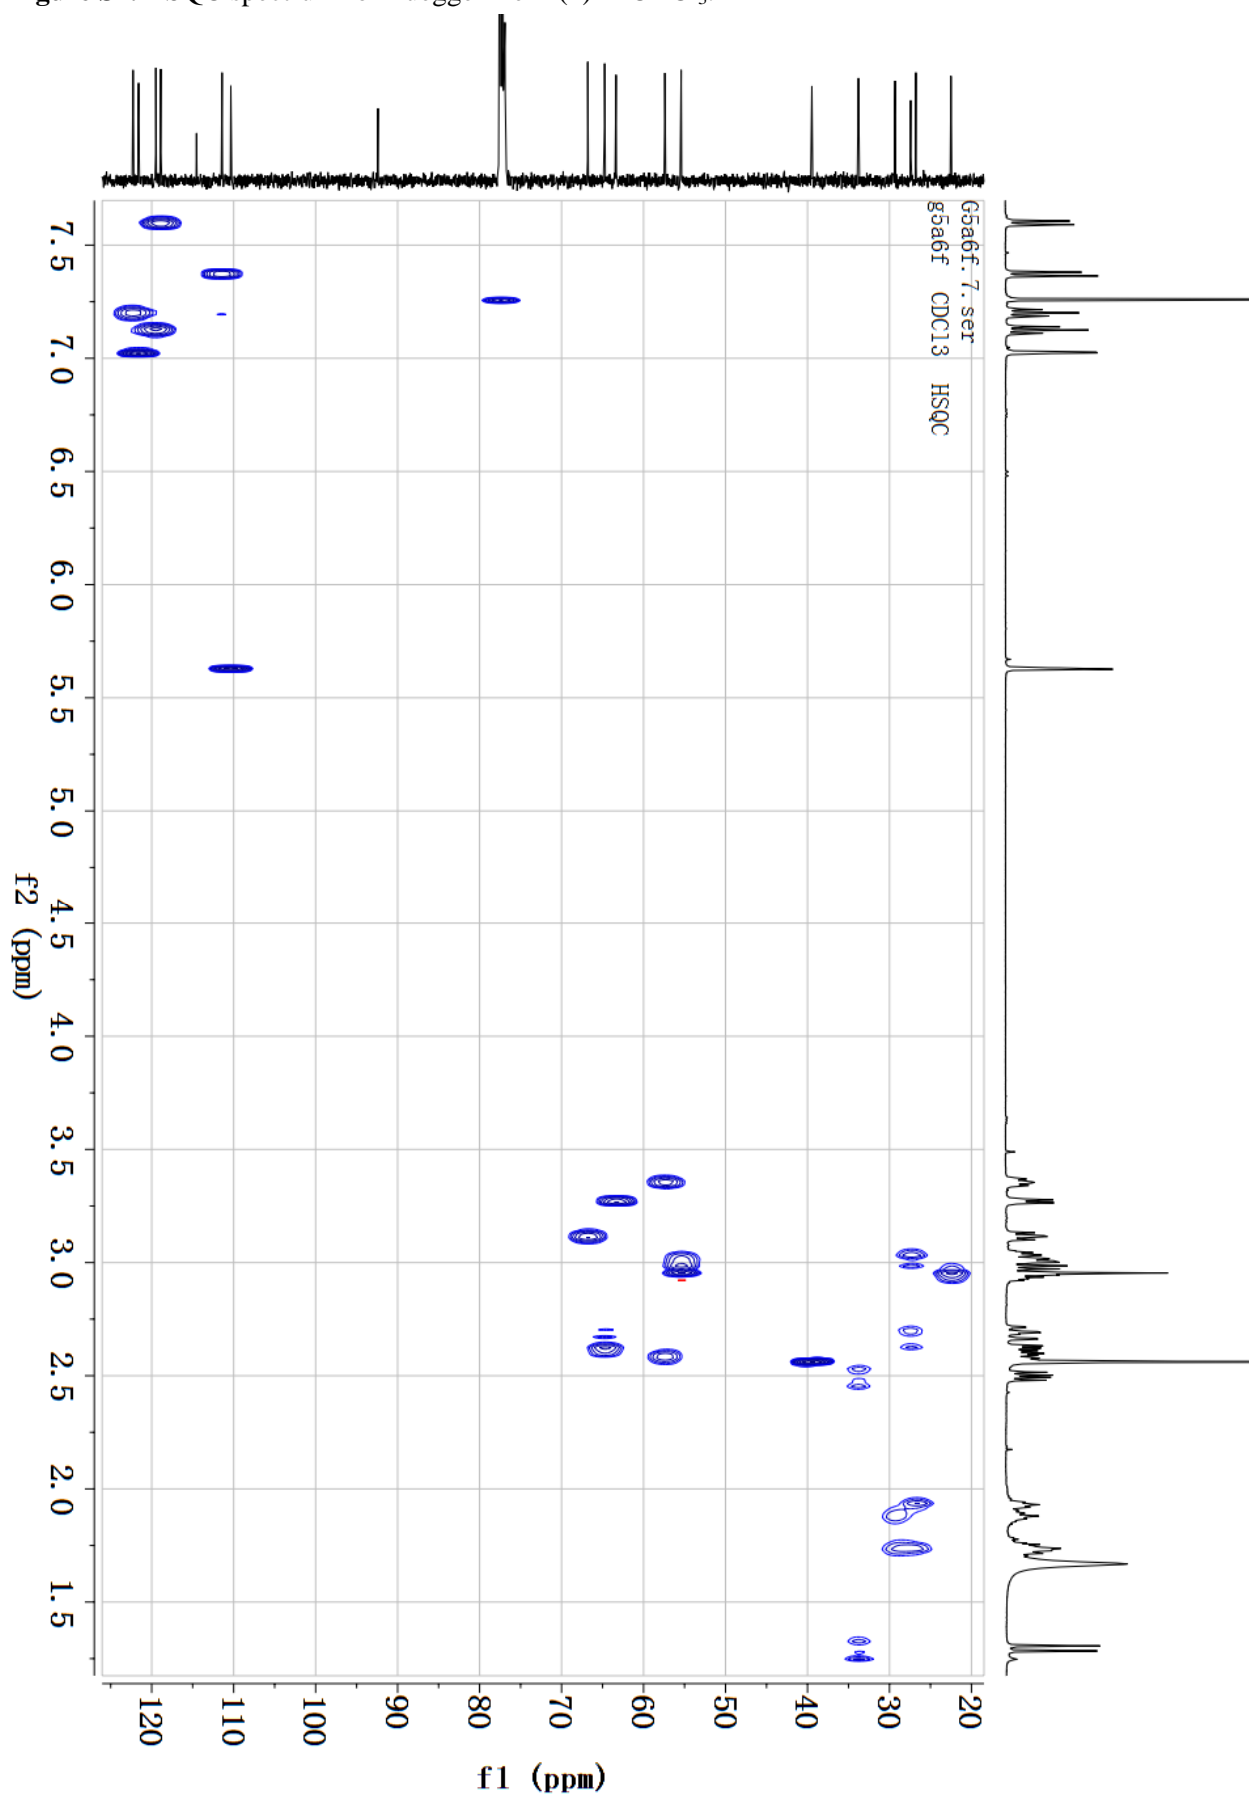

Figure S5. HMBC spectrum for flueggeanine E (1) in CDCl<sub>3</sub>.

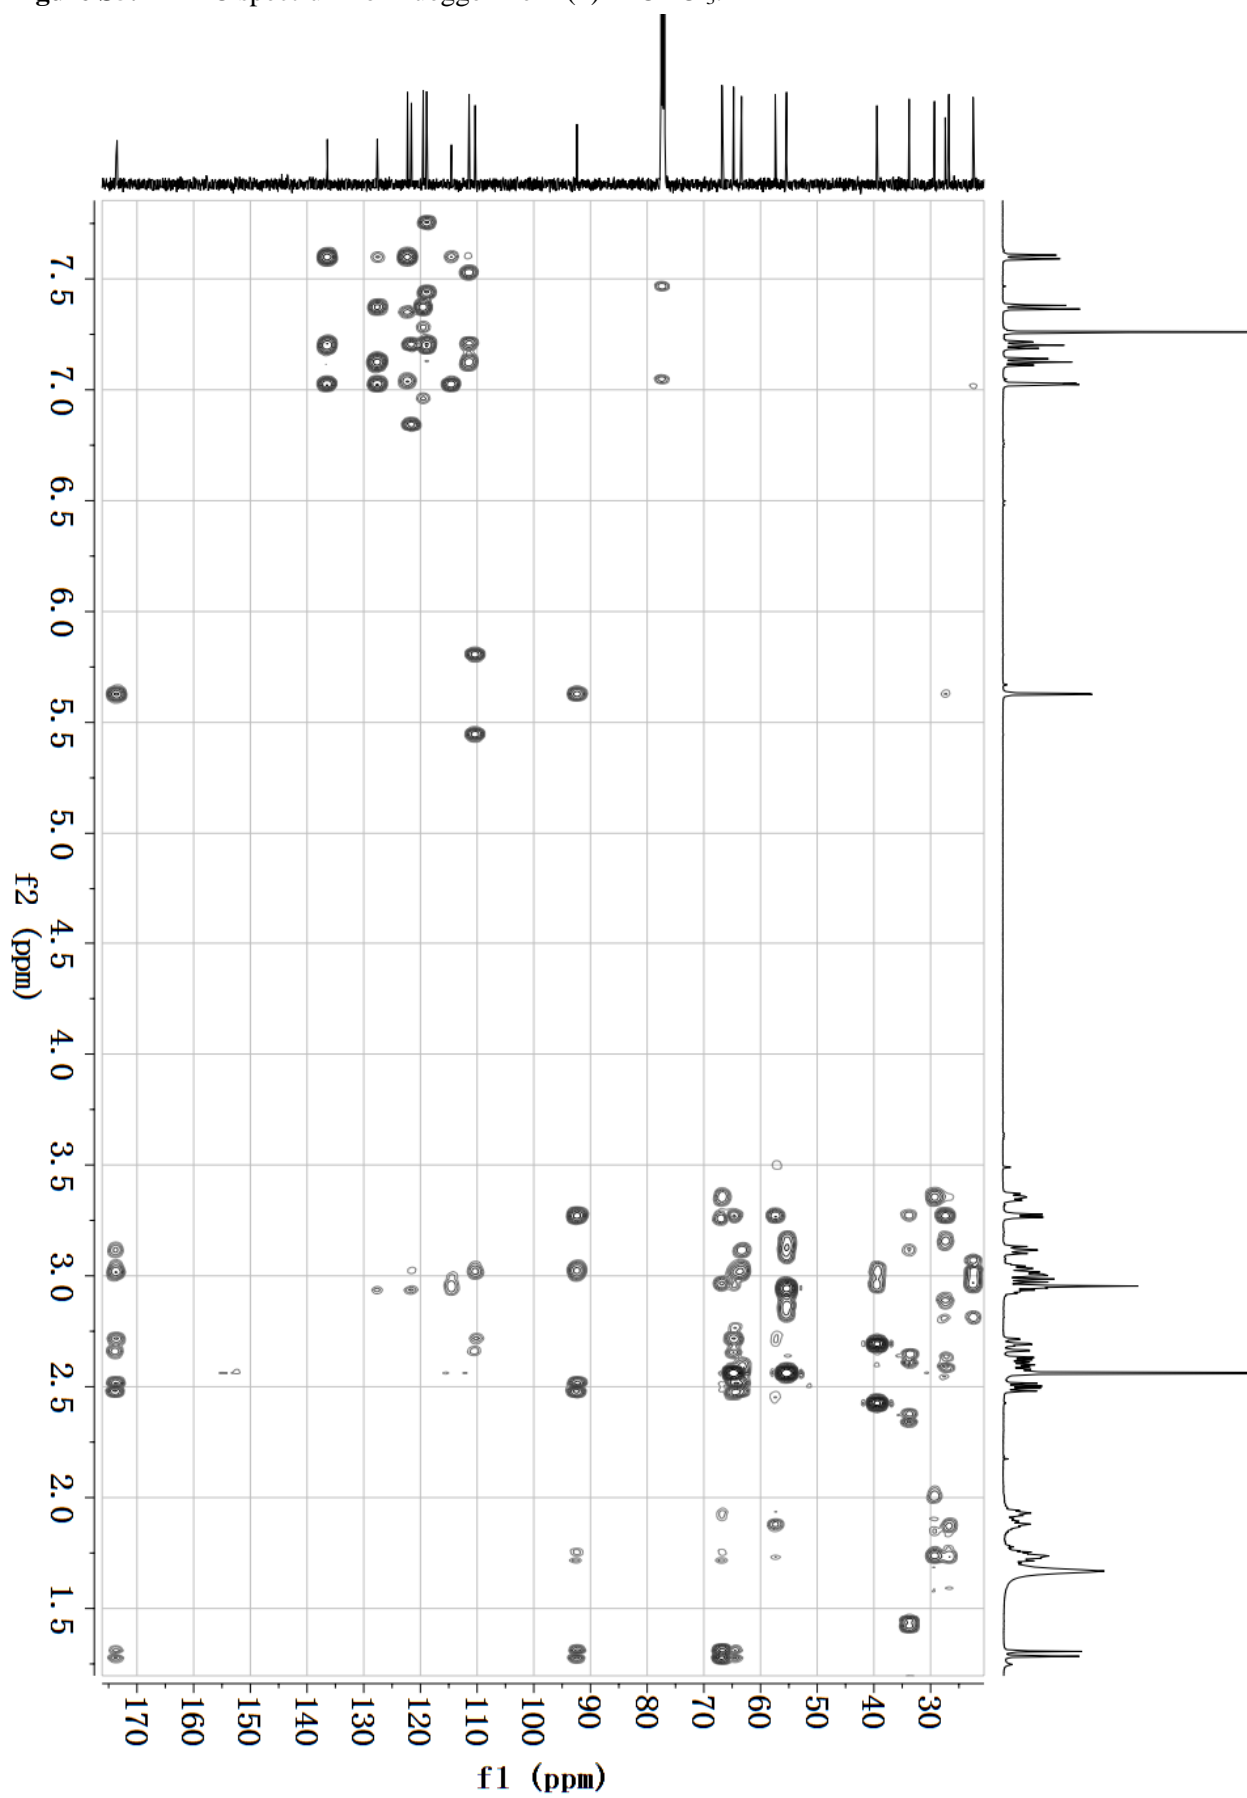



Figure S6. ROESY spectrum for flueggein E (1) in CDCl<sub>3</sub>.

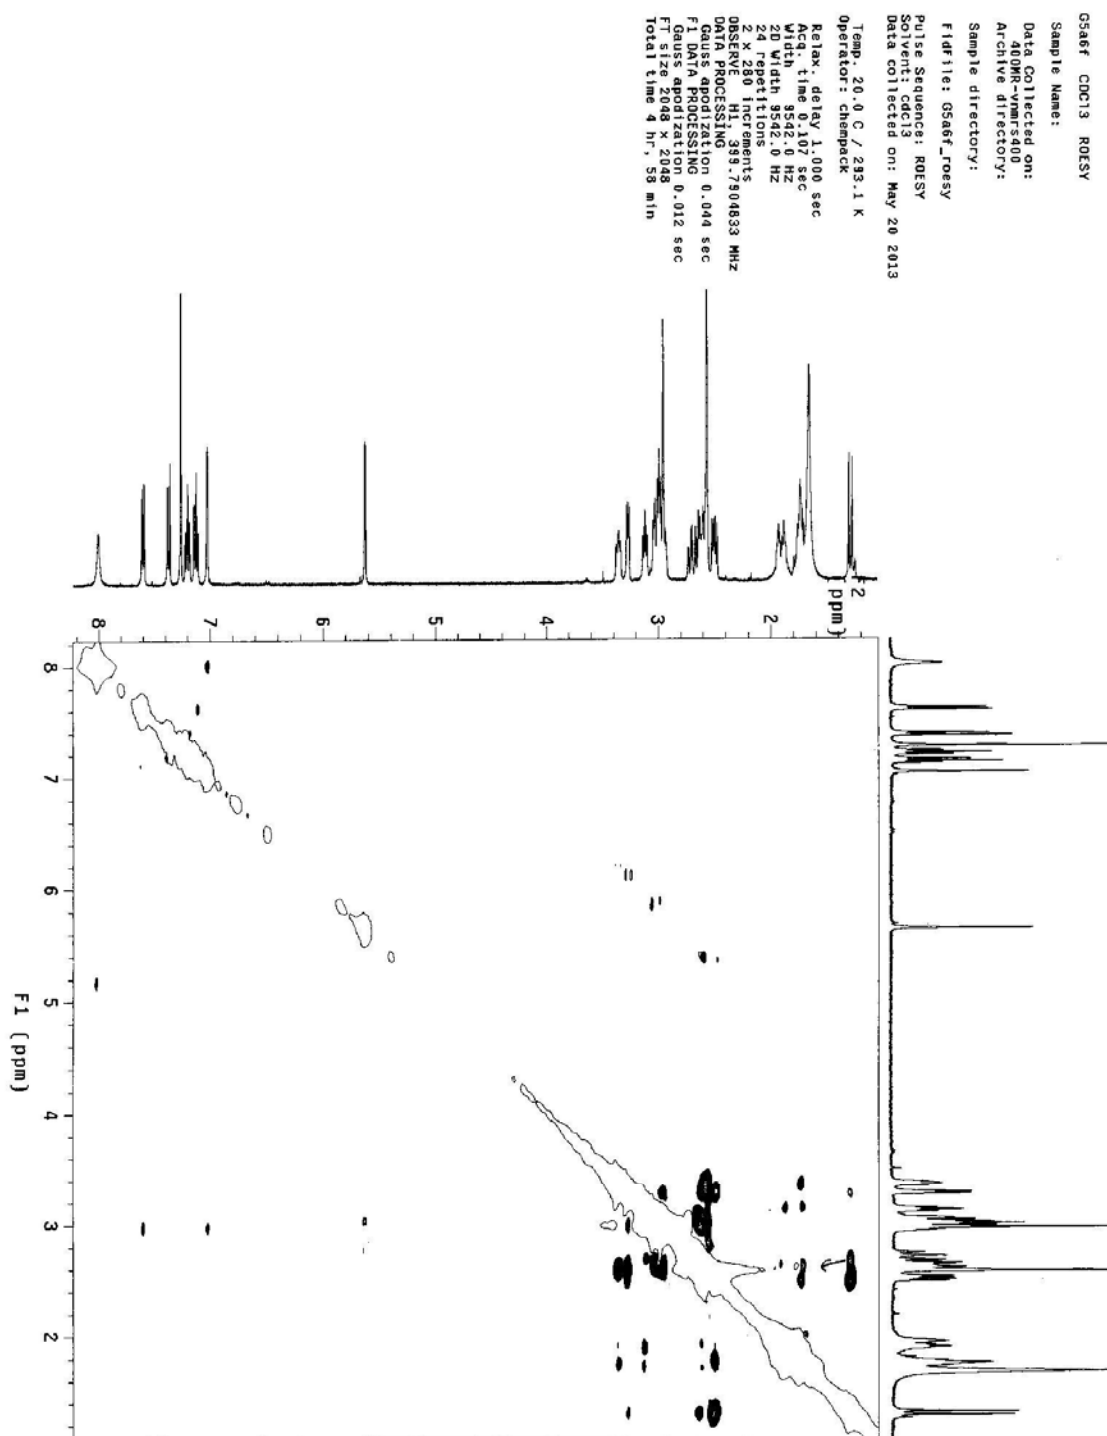

Figure S7. IR spectrum for flueggeine E (1).

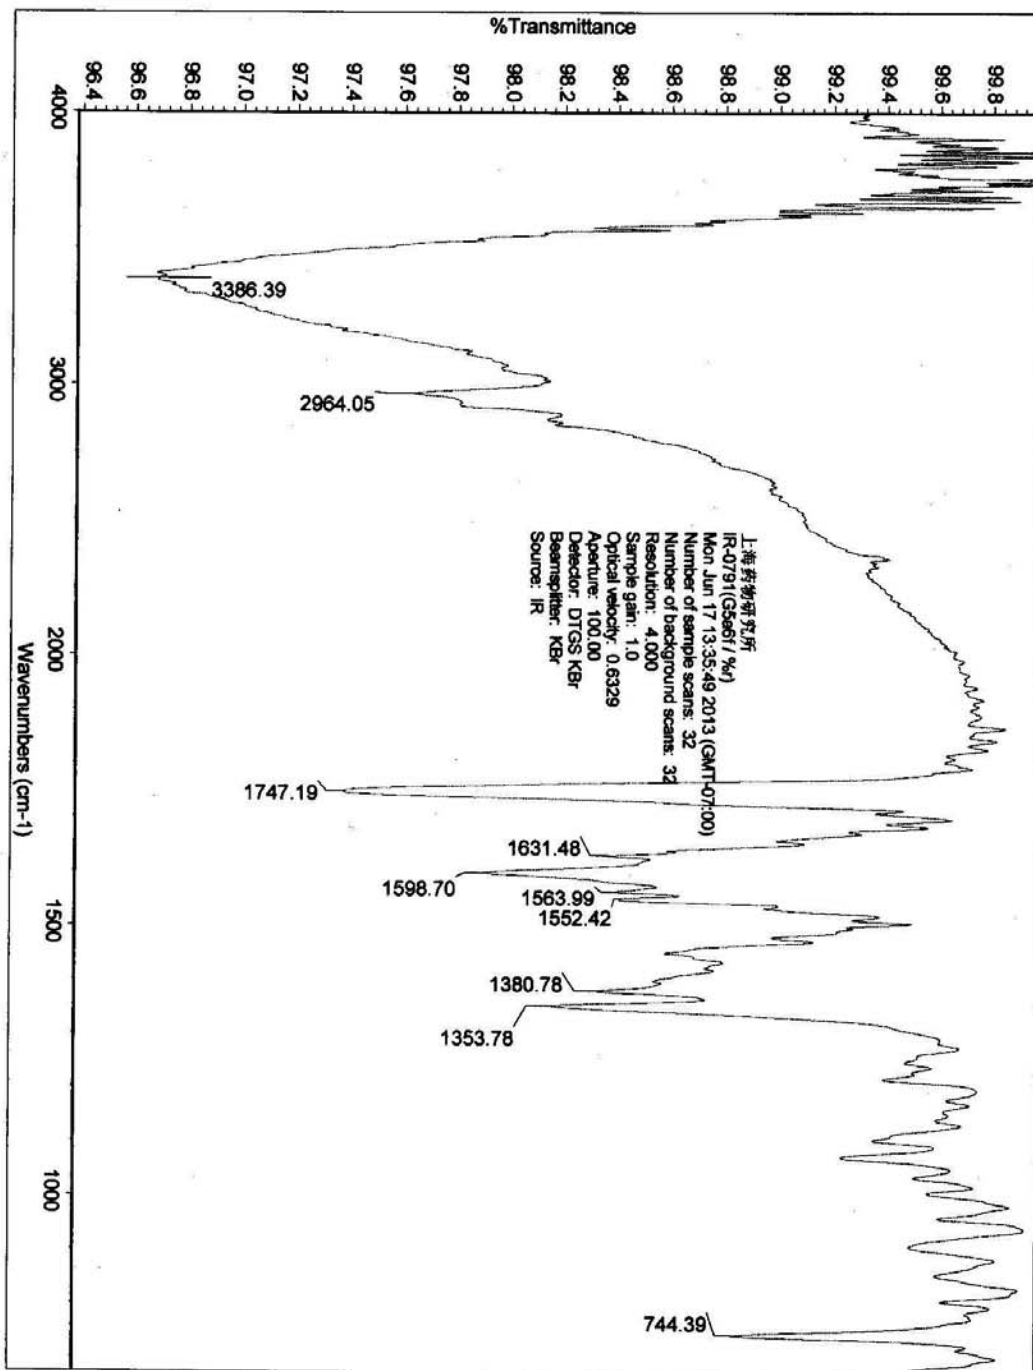

Figure S8. (+)-ESIMS spectrum for flueggeine E (1).

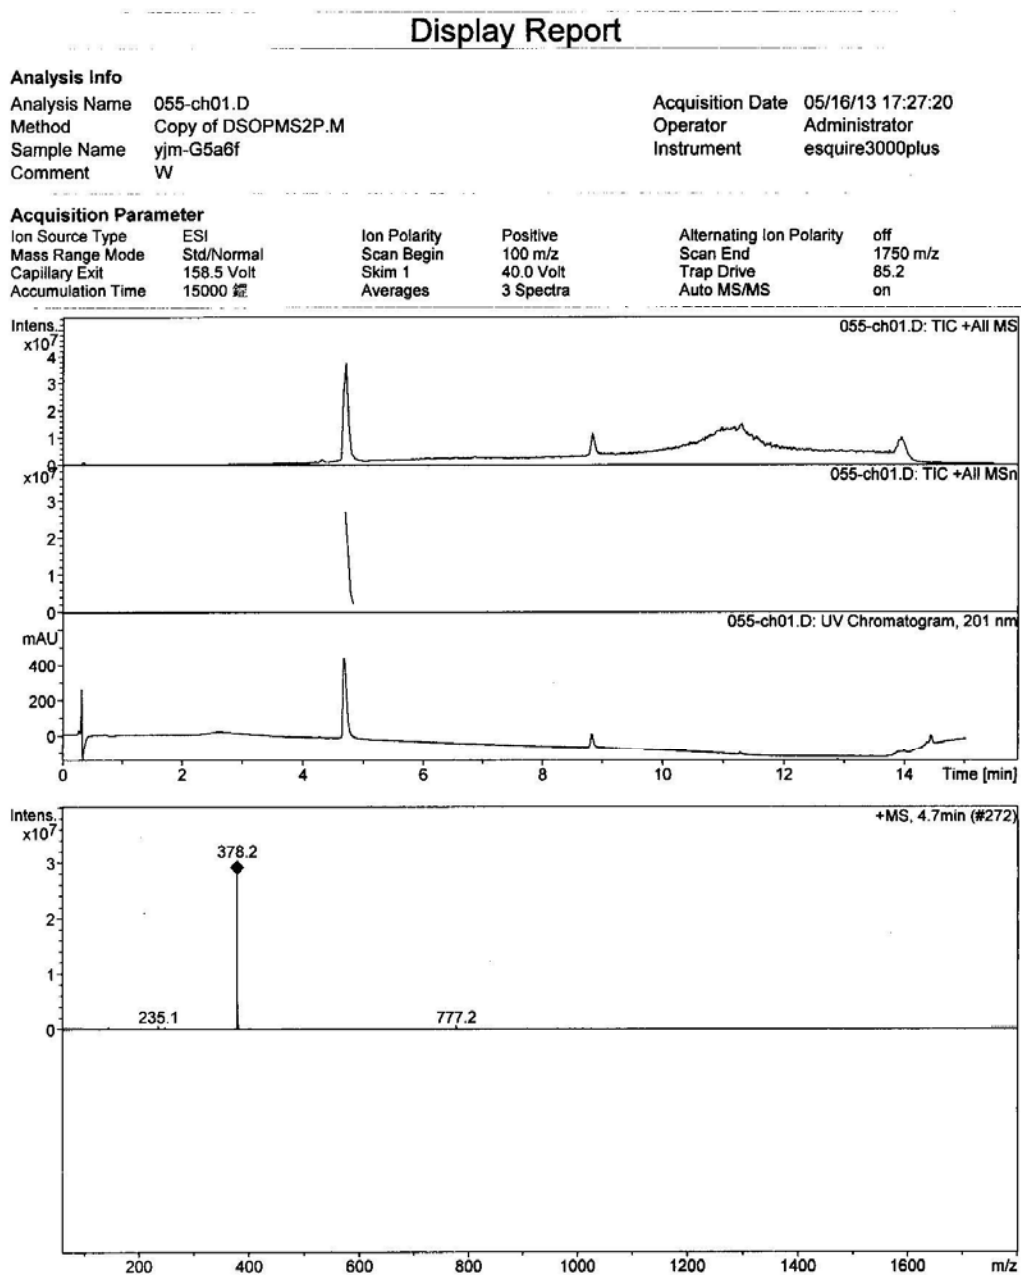

Figure S9. (+)-HRESIMS spectrum for flueggeine E (1).

Elemental Composition Report

Single Mass Analysis

Tolerance = 5.0 PPM / DBE: min = -1.5, max = 50.0  
 Element prediction: Off  
 Number of isotope peaks used for i-FIT = 3

Monoisotopic Mass, Even Electron Ions

266 formula(e) evaluated with 1 results within limits (up to 50 closest results for each mass)

Elements Used:

C: 6-80 H: 2-120 N: 0-3 O: 0-20

G5a6f

LCT PXE KE324

23-May-2013

17:03:04

1: TOF MS ES+

1.62e+004

G5a6f\_0523 10 (0.195) AM2 (Ar,10000.0,0.00,1.00); ABS; Cm (5:26)

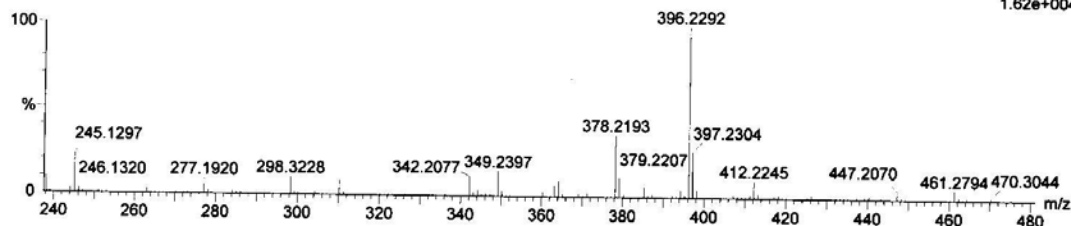

Minimum:

Maximum: 3.0 5.0 -1.5

Maximum: 3.0 5.0 50.0

| Mass     | Calc. Mass | mDa | PPM | DBE  | i-FIT | i-FIT (Norm) | Formula       |
|----------|------------|-----|-----|------|-------|--------------|---------------|
| 378.2193 | 378.2182   | 1.1 | 2.9 | 11.5 | 57.4  | 0.0          | C23 H28 N3 O2 |

Figure S10.  $^1\text{H}$  NMR spectrum for flueggeine F (**2**) in  $\text{CDCl}_3$ .

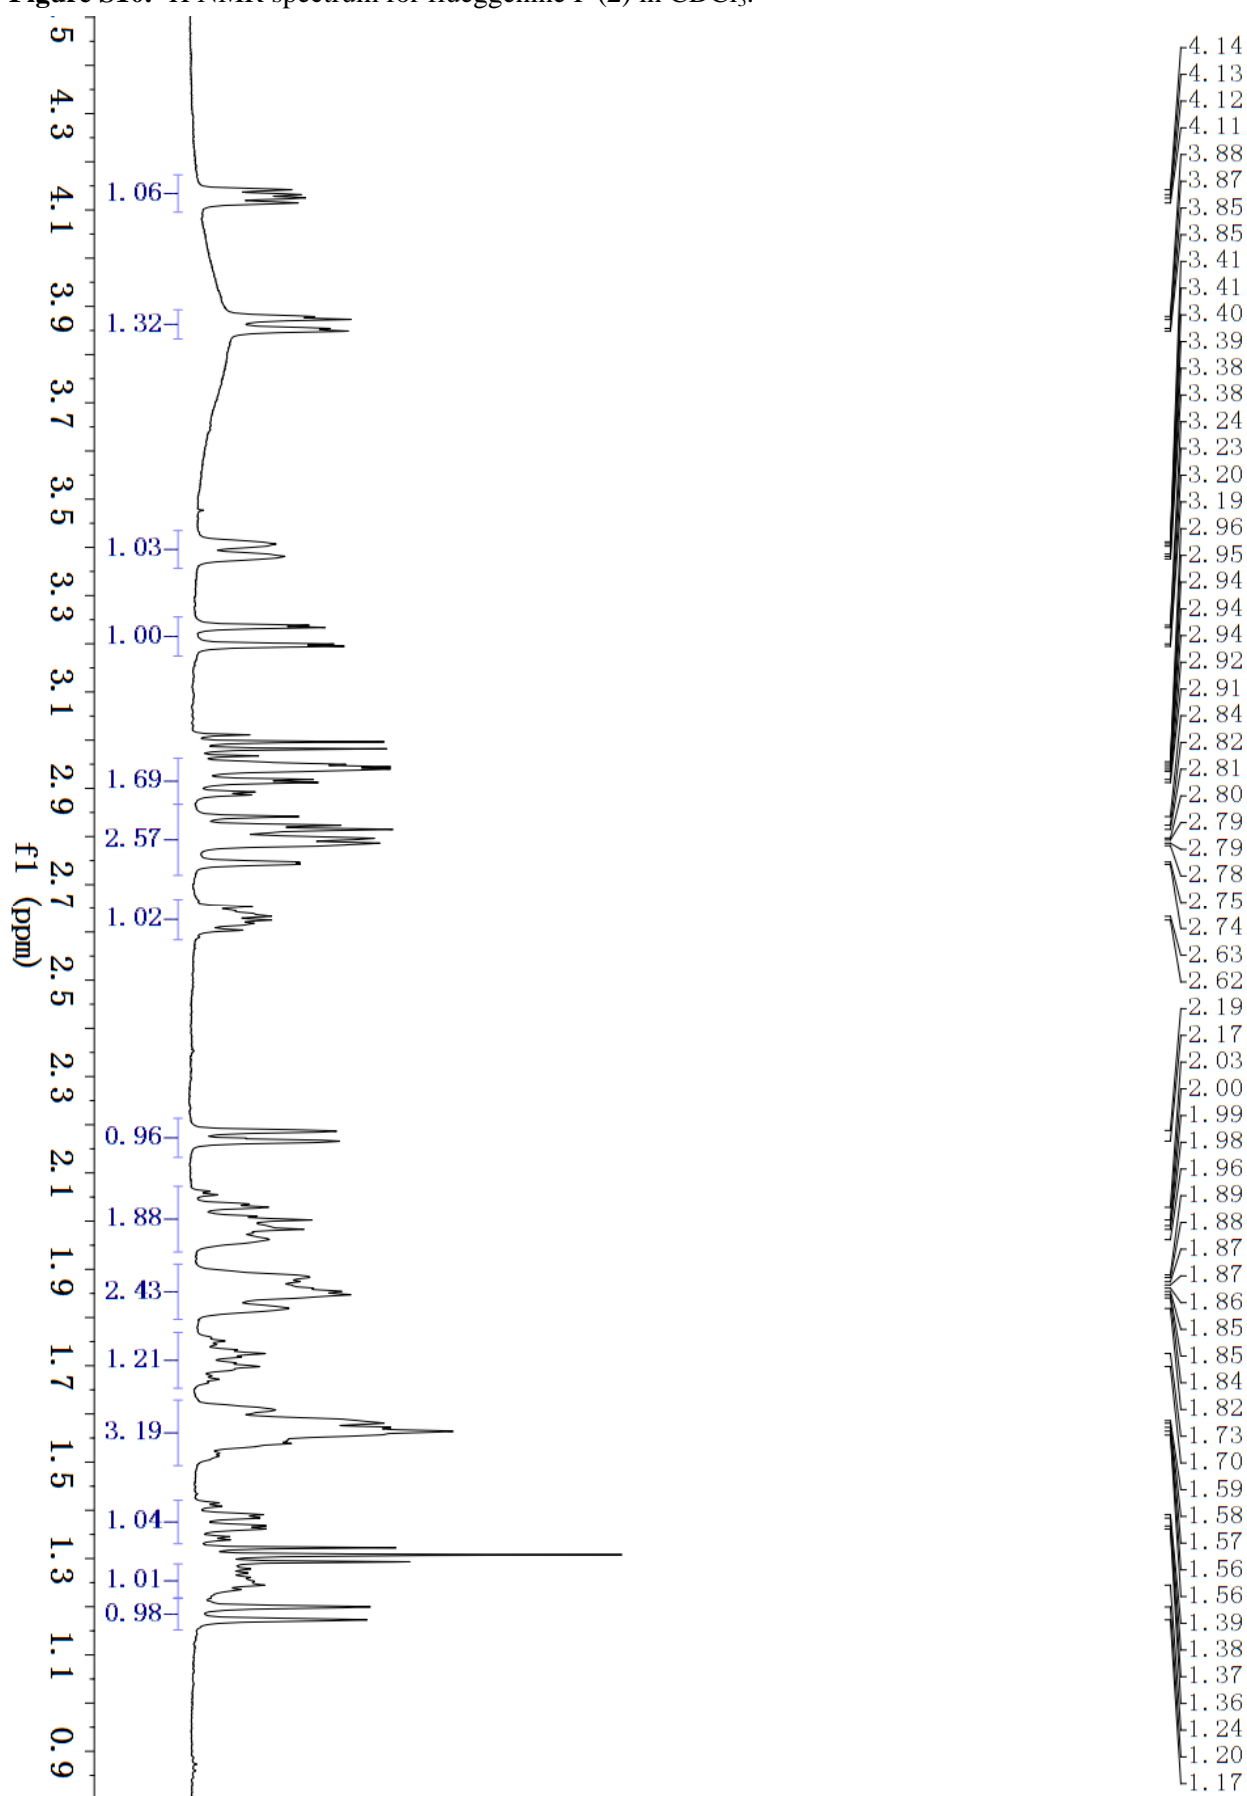

Figure S11.  $^{13}\text{C}$  NMR spectrum for flueggeine F (2) in  $\text{CDCl}_3$ .

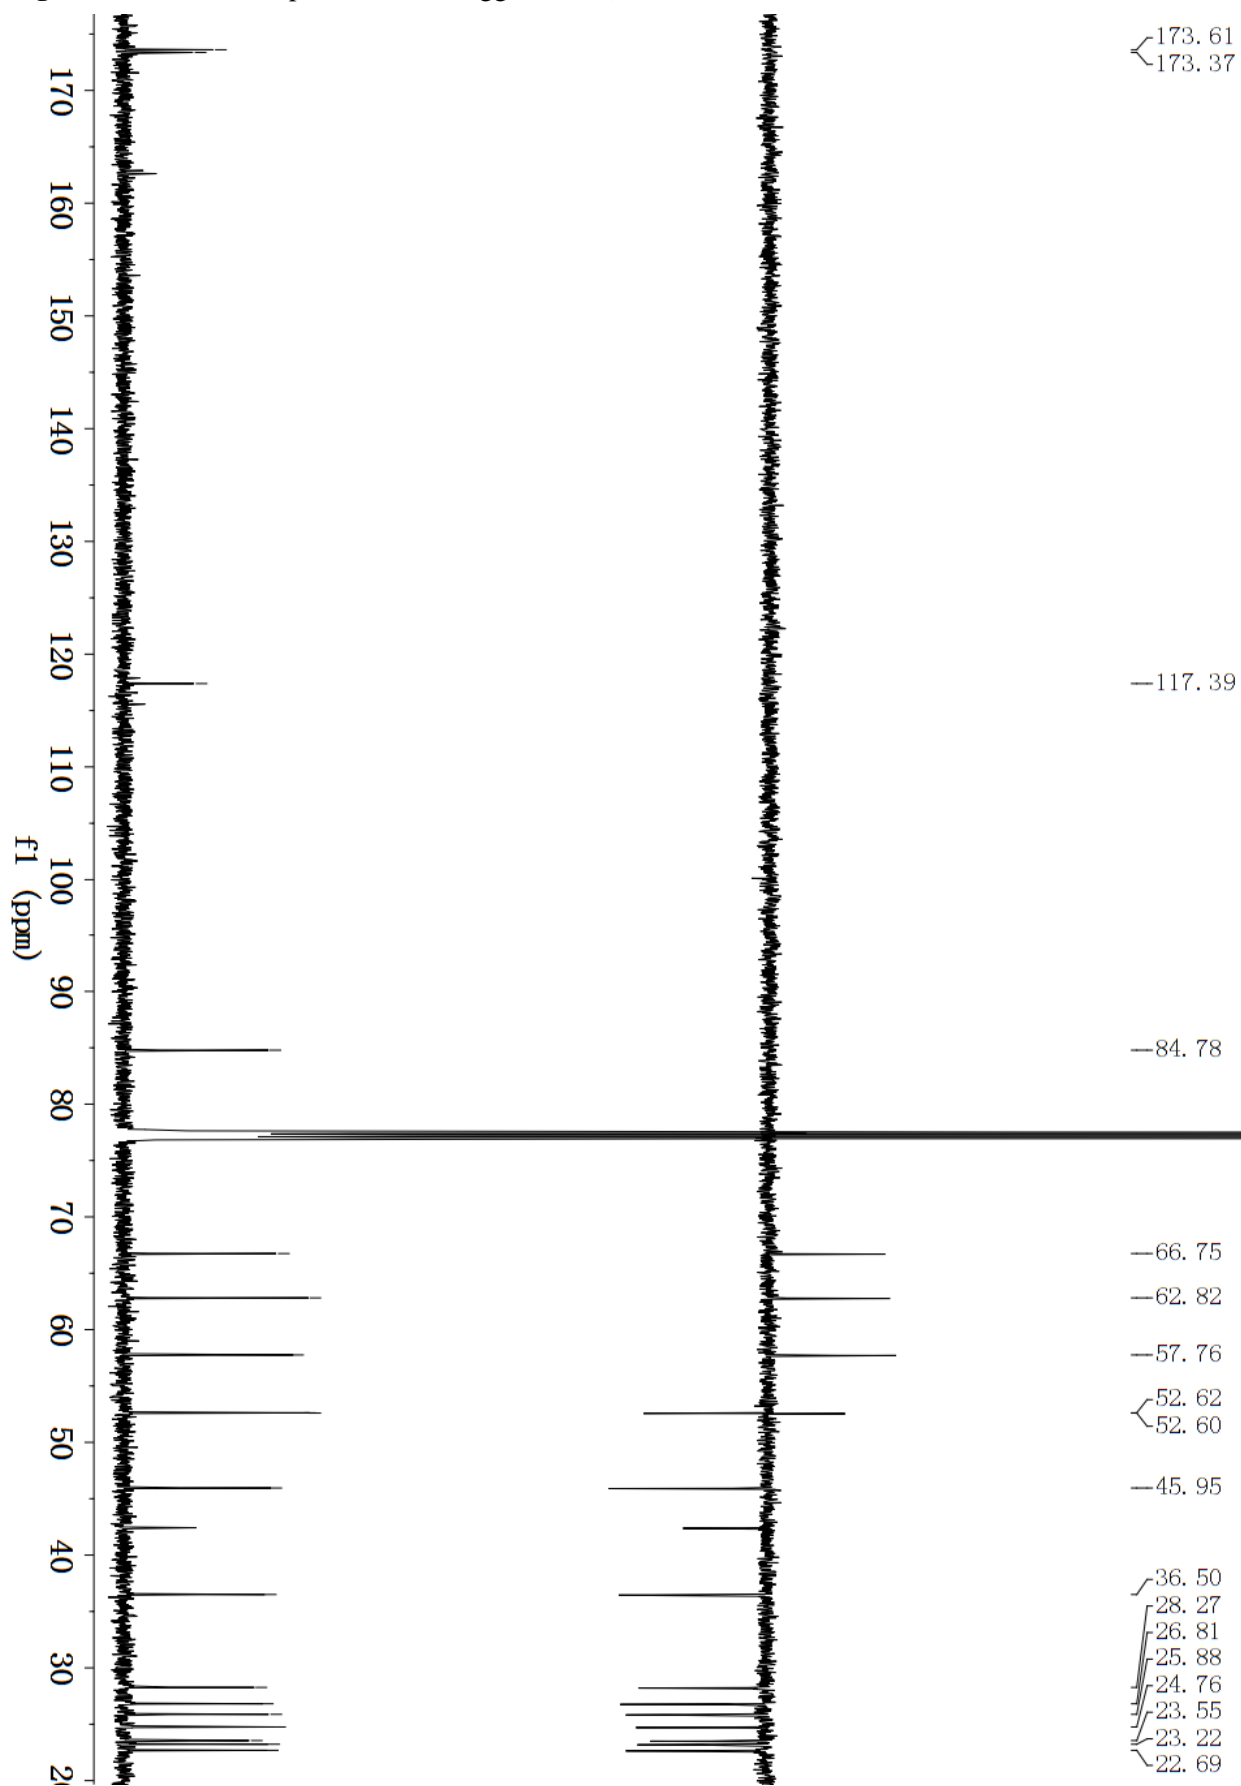

Figure S12.  $^1\text{H}$ - $^1\text{H}$  COSY spectrum for flueggeanine F (**2**) in  $\text{CDCl}_3$ .

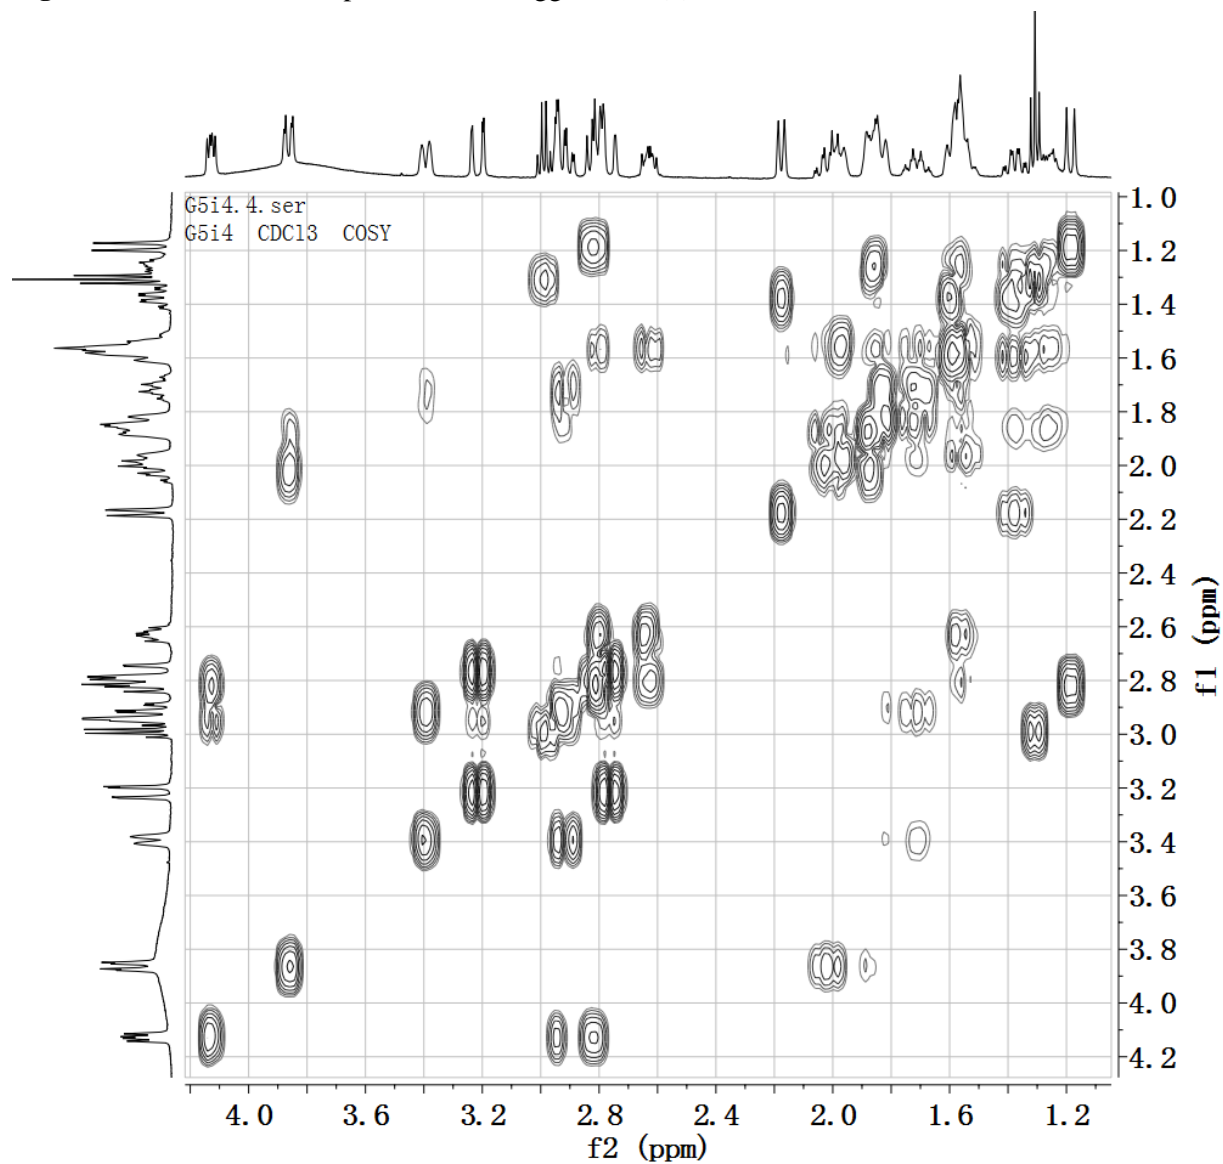

Figure S13. HSQC spectrum for flueggeine F (2) in CDCl<sub>3</sub>.

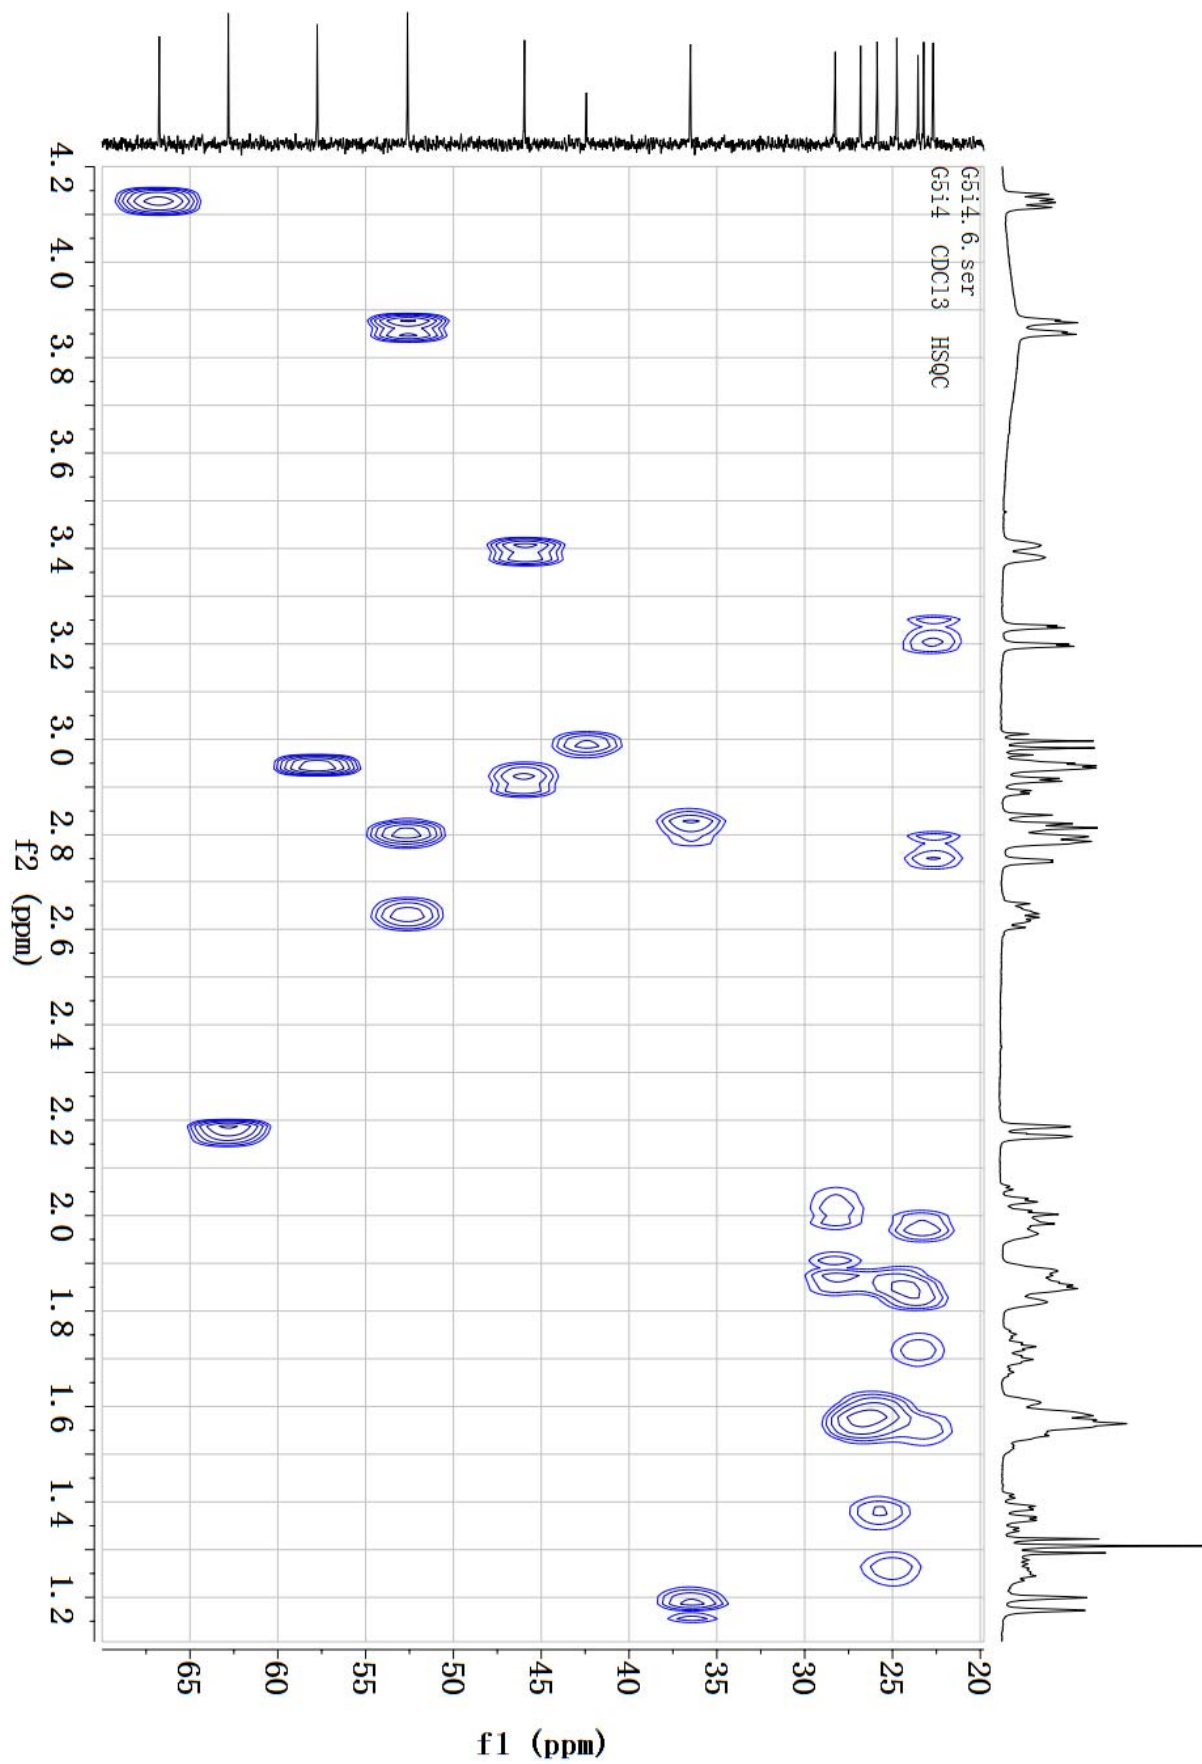



Figure S14. HMBC spectrum for flueggeanine F (2) in CDCl<sub>3</sub>.

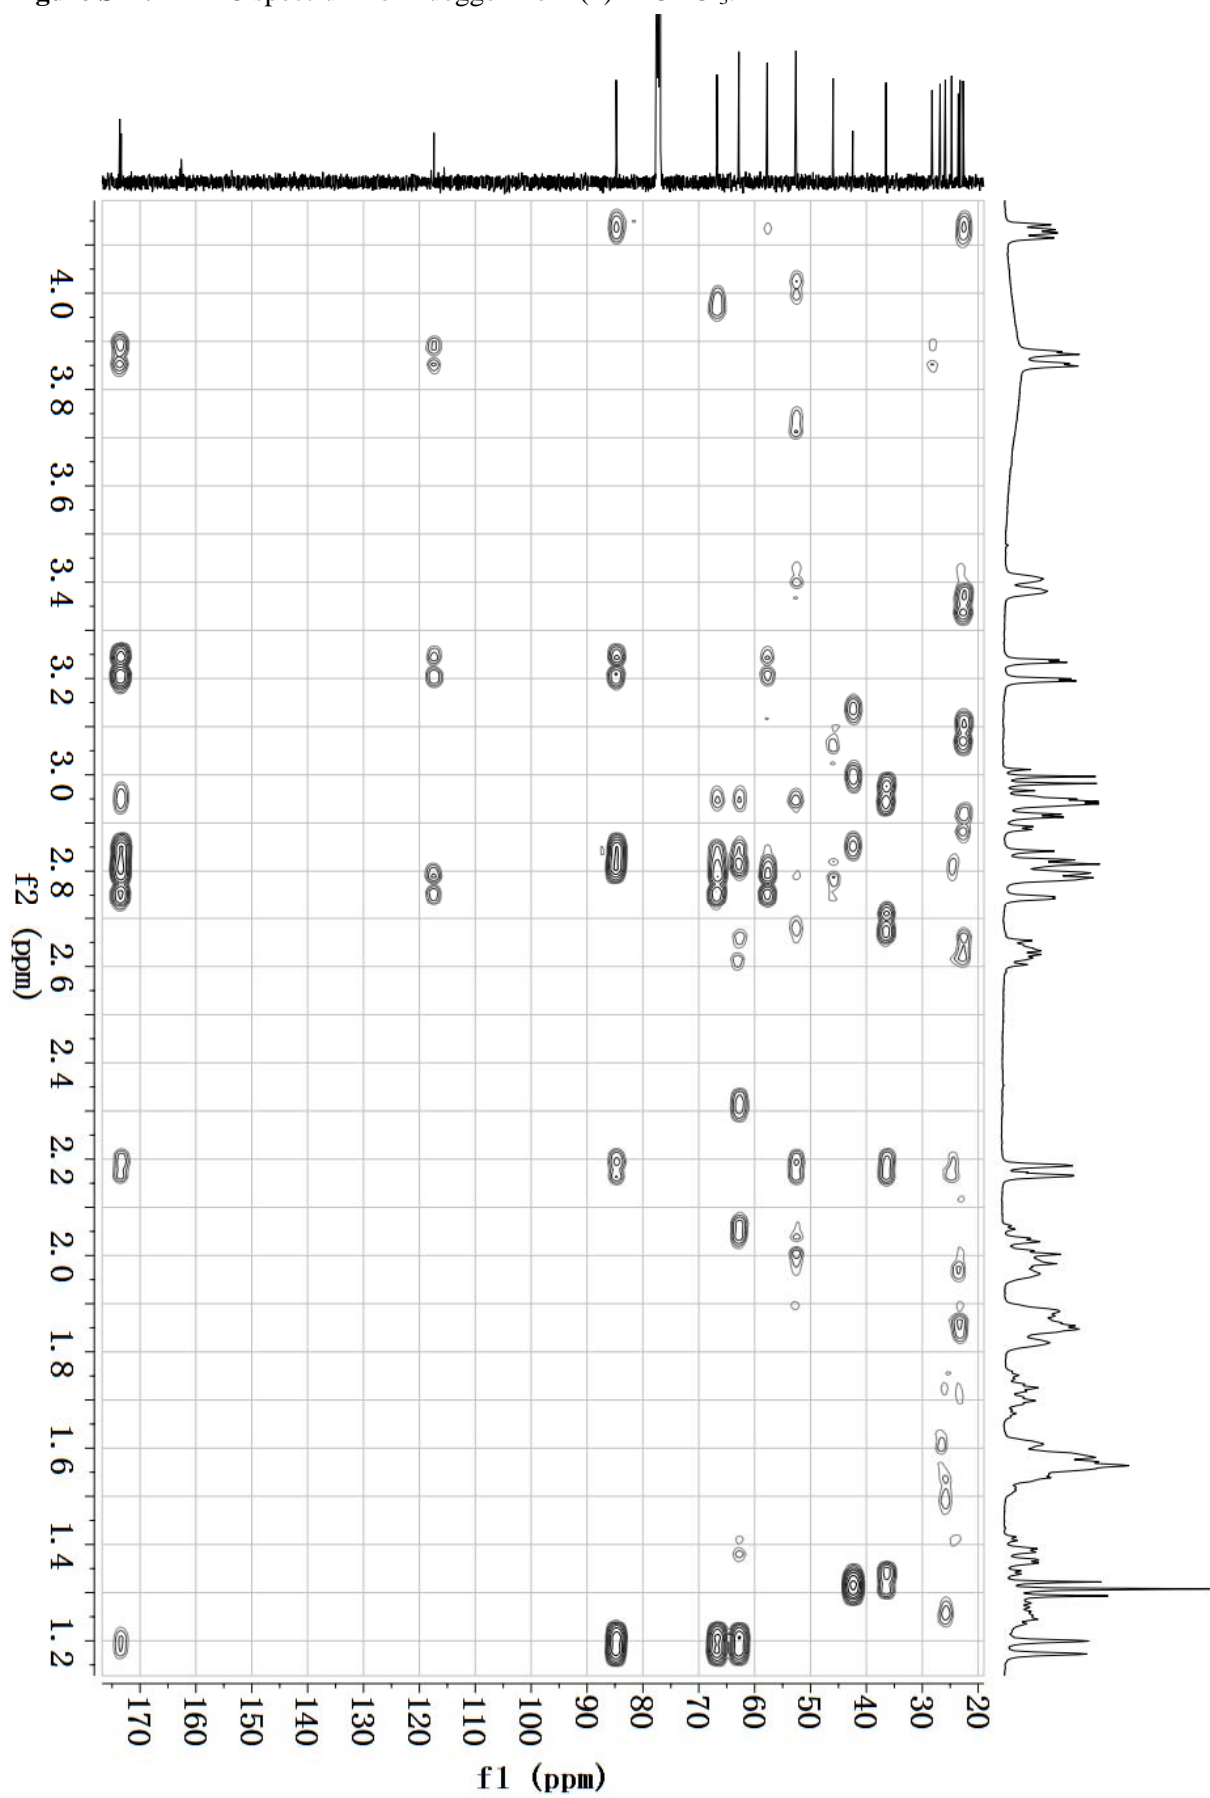

Figure S15. ROESY spectrum for flueggenine F (2) in CDCl<sub>3</sub>.

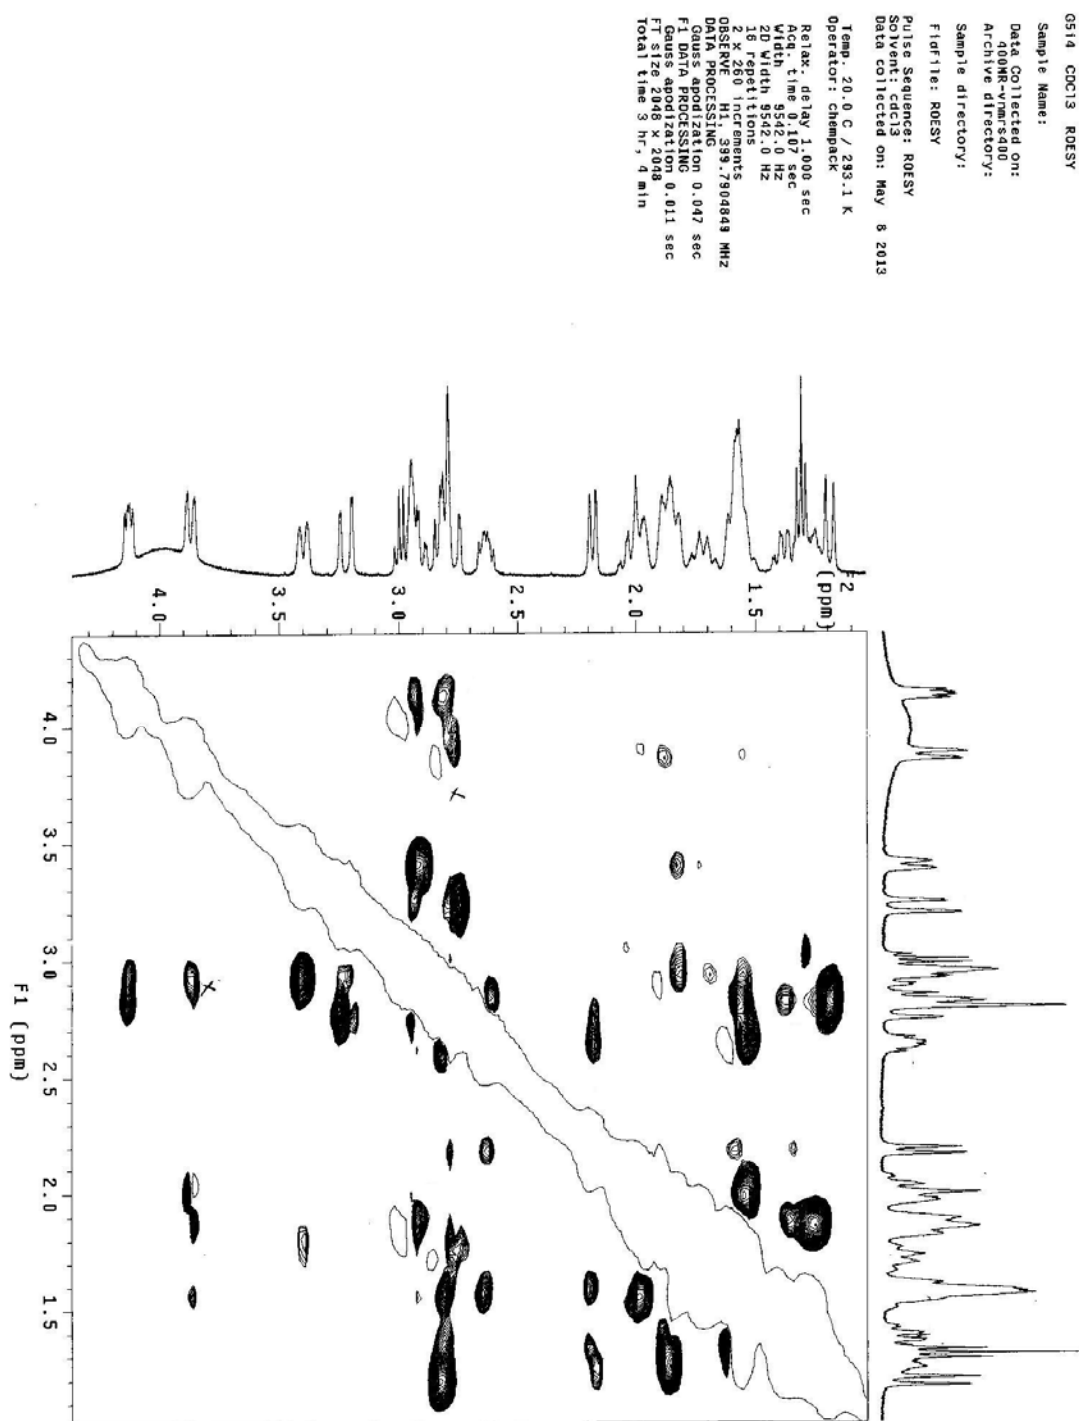

Figure S16. IR spectrum for flueggeine F (2).

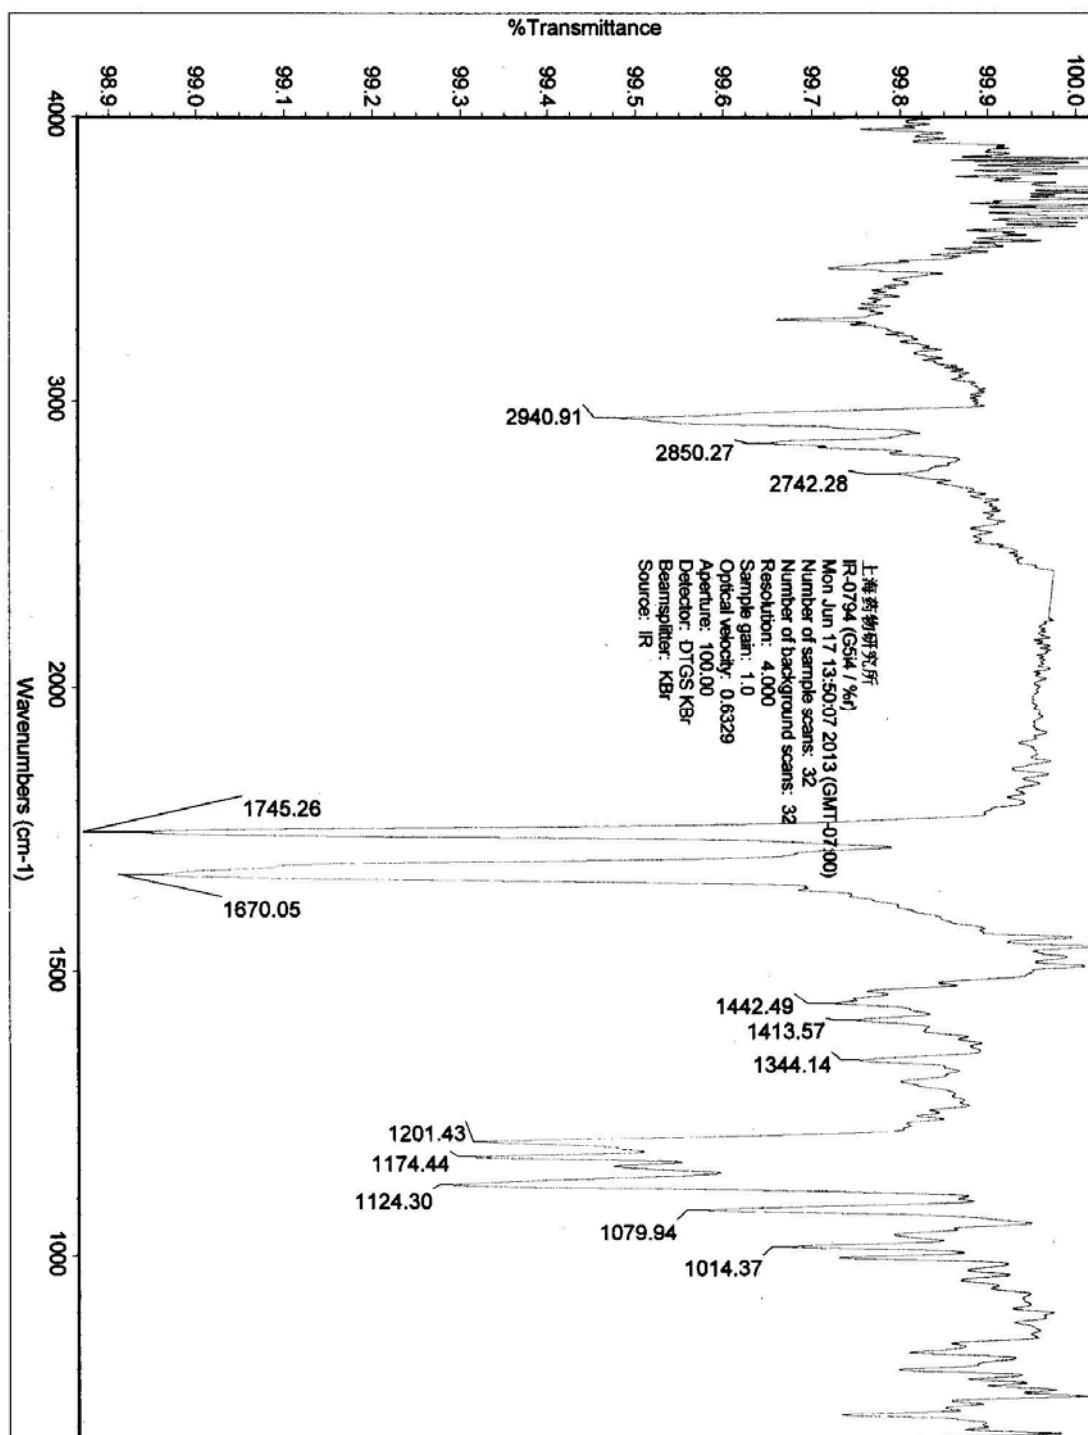

Figure S17. (+)-ESIMS spectrum for flueggeanine F (2).

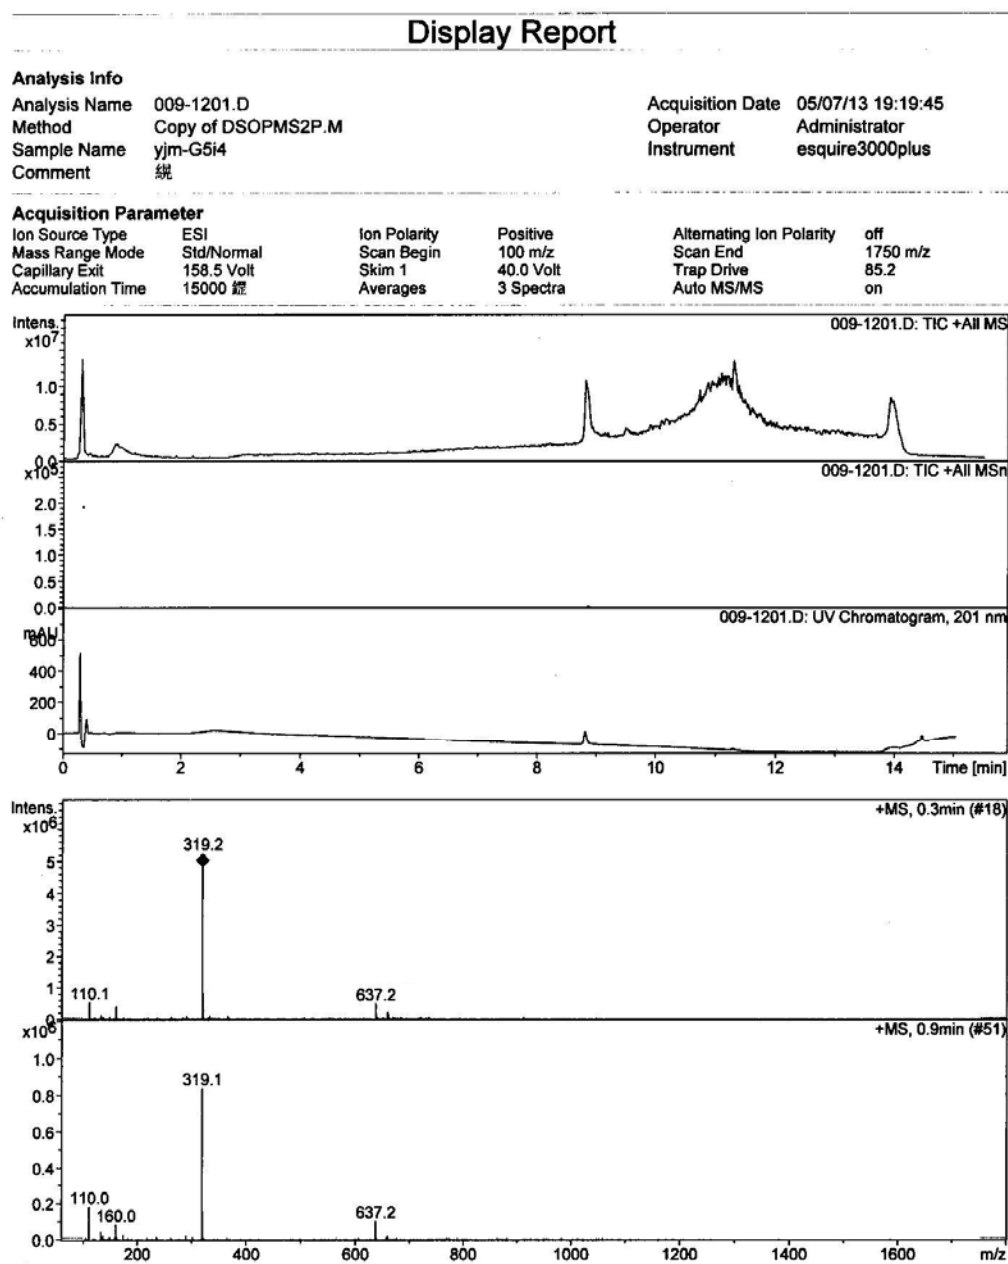

Figure S18. (+)-HRESIMS spectrum for flueggeine F (2).

Elemental Composition Report

Single Mass Analysis

Tolerance = 5.0 PPM / DBE: min = -1.5, max = 50.0

Element prediction: Off

Number of isotope peaks used for i-FIT = 3

Monoisotopic Mass, Even Electron Ions

150 formula(e) evaluated with 1 results within limits (up to 50 closest results for each mass)

Elements Used:

C: 6-80 H: 2-120 N: 0-2 O: 0-20

G5i4

LCT PXE KE324

09-May-2013

15:04:51

1: TOF MS ES+

1.65e+004

G5i4\_0509 21 (0.460) AM2 (Ar,10000.0,0.00,1.00); ABS; Cm (21:36)

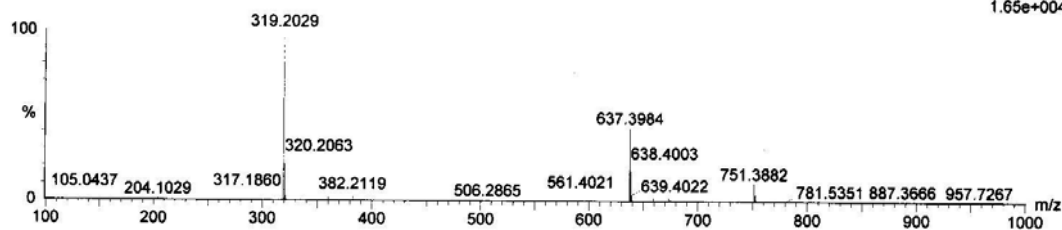

Minimum:

Maximum: 3.0 5.0 -1.5 50.0

| Mass     | Calc. Mass | mDa | PPM | DBE | i-FIT | i-FIT (Norm) | Formula       |
|----------|------------|-----|-----|-----|-------|--------------|---------------|
| 319.2029 | 319.2022   | 0.7 | 2.2 | 6.5 | 105.1 | 0.0          | C18 H27 N2 O3 |

Figure S19.  $^1\text{H}$  NMR spectrum for flueggeine G (**3**) in  $\text{CDCl}_3$ .

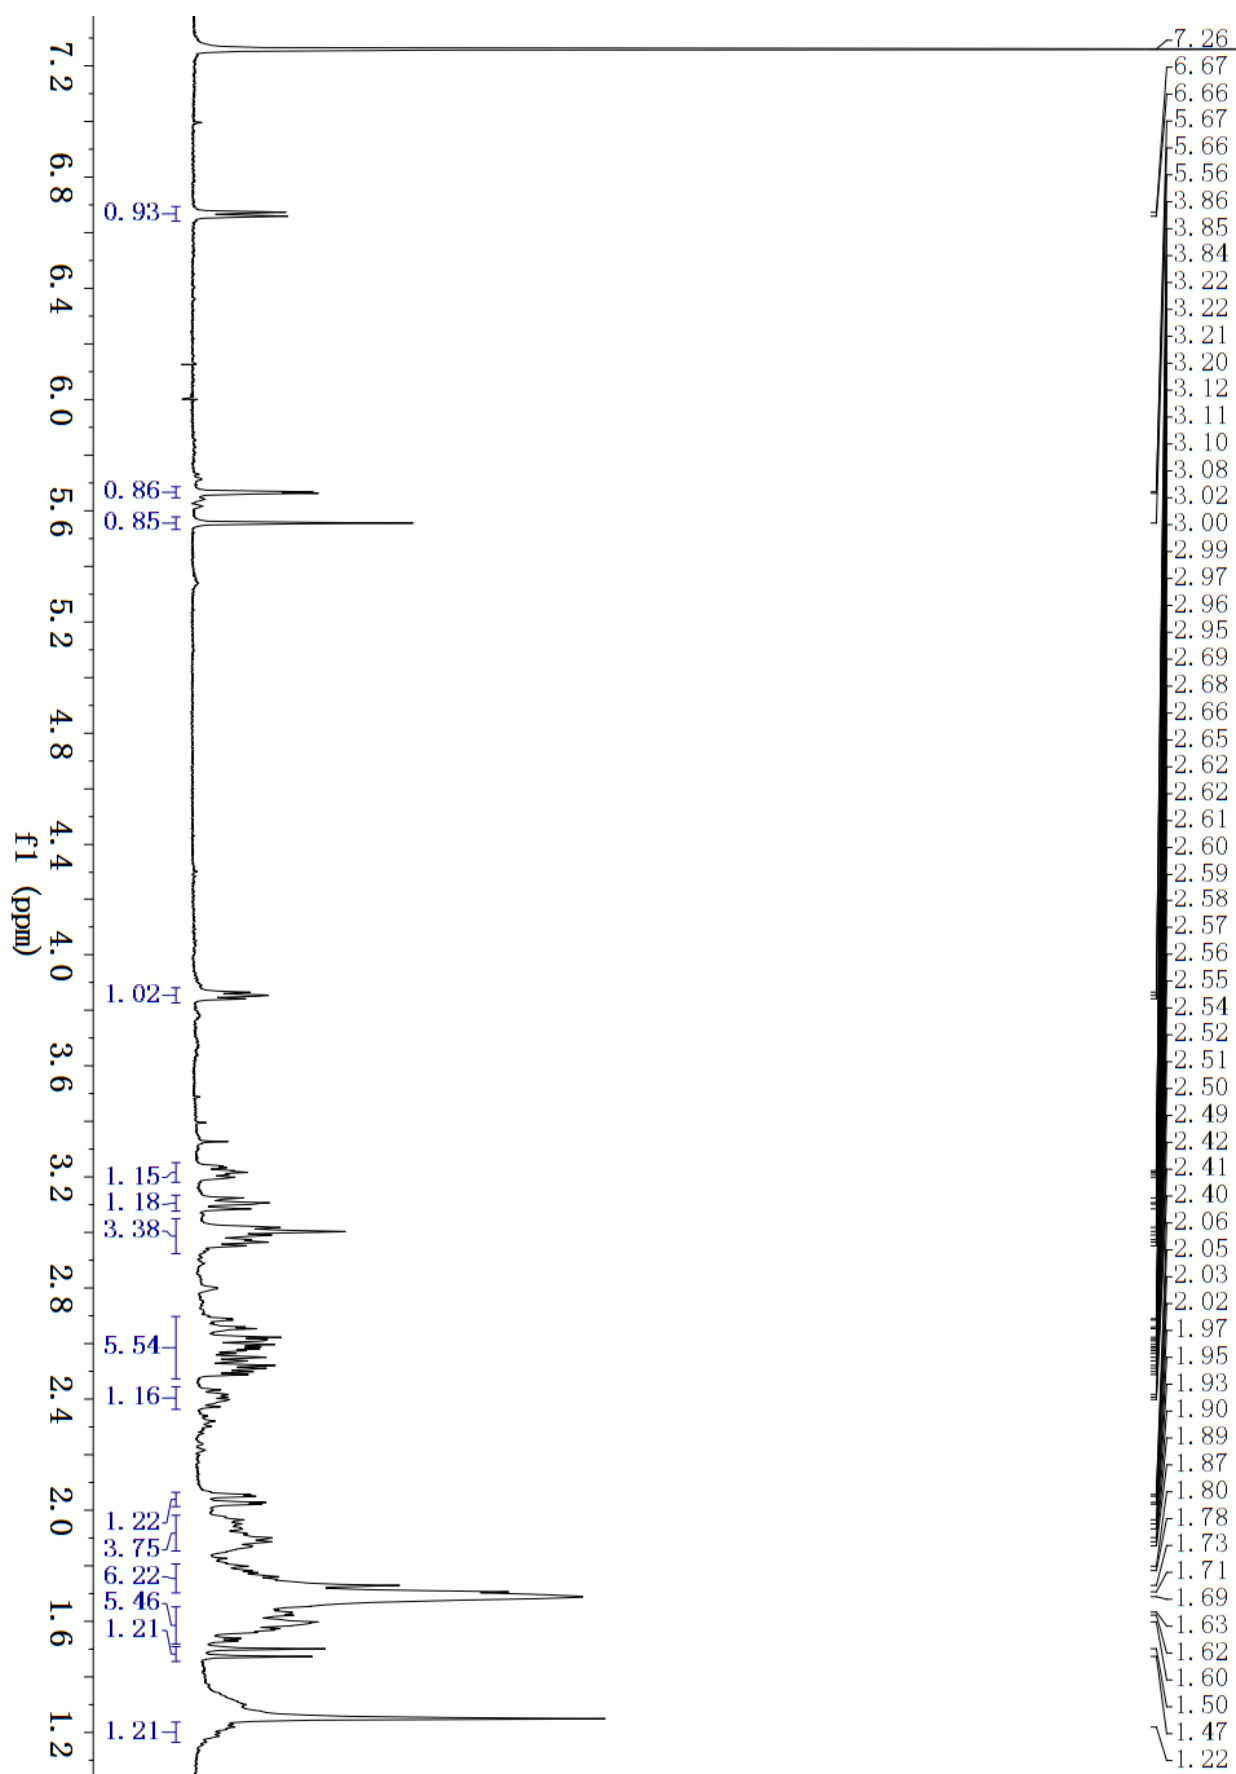

Figure S20.  $^{13}\text{C}$  NMR spectrum for flueggenine G (3) in  $\text{CDCl}_3$ .

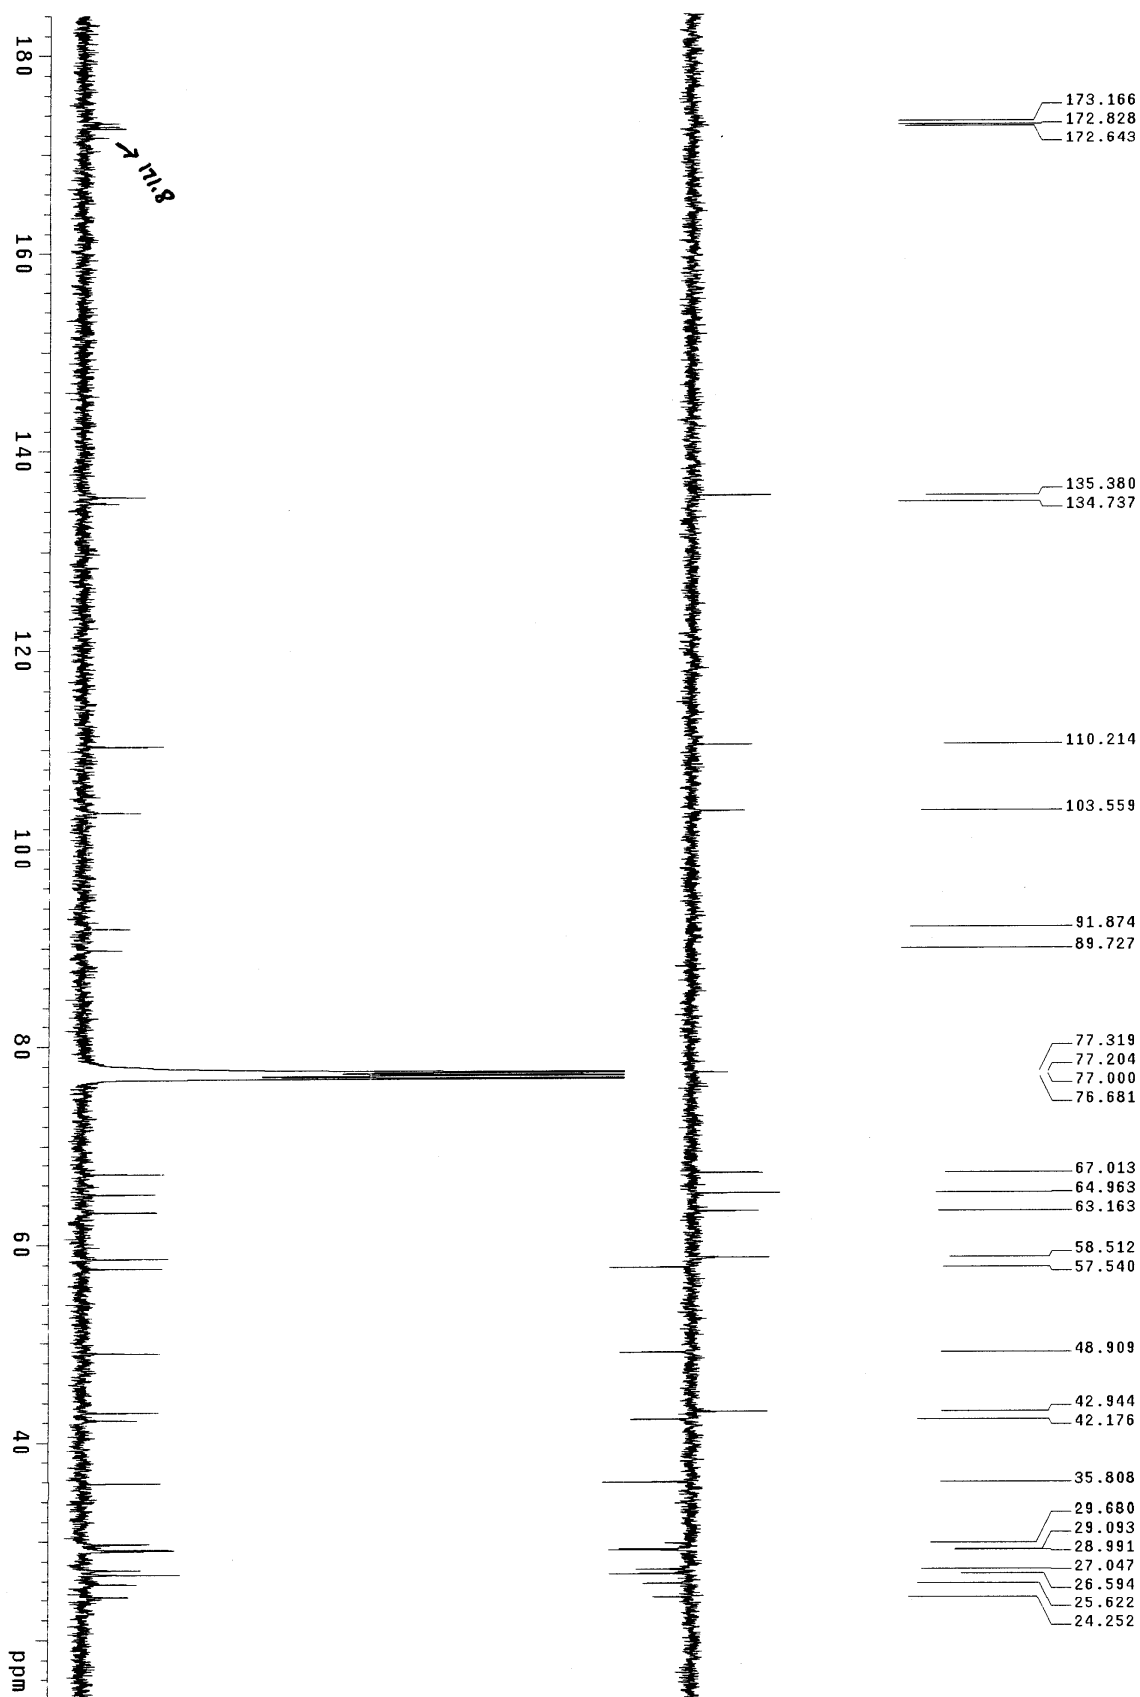

Figure S21.  $^1\text{H}$ - $^1\text{H}$  COSY spectrum for flueggeine G (**3**) in  $\text{CDCl}_3$ .

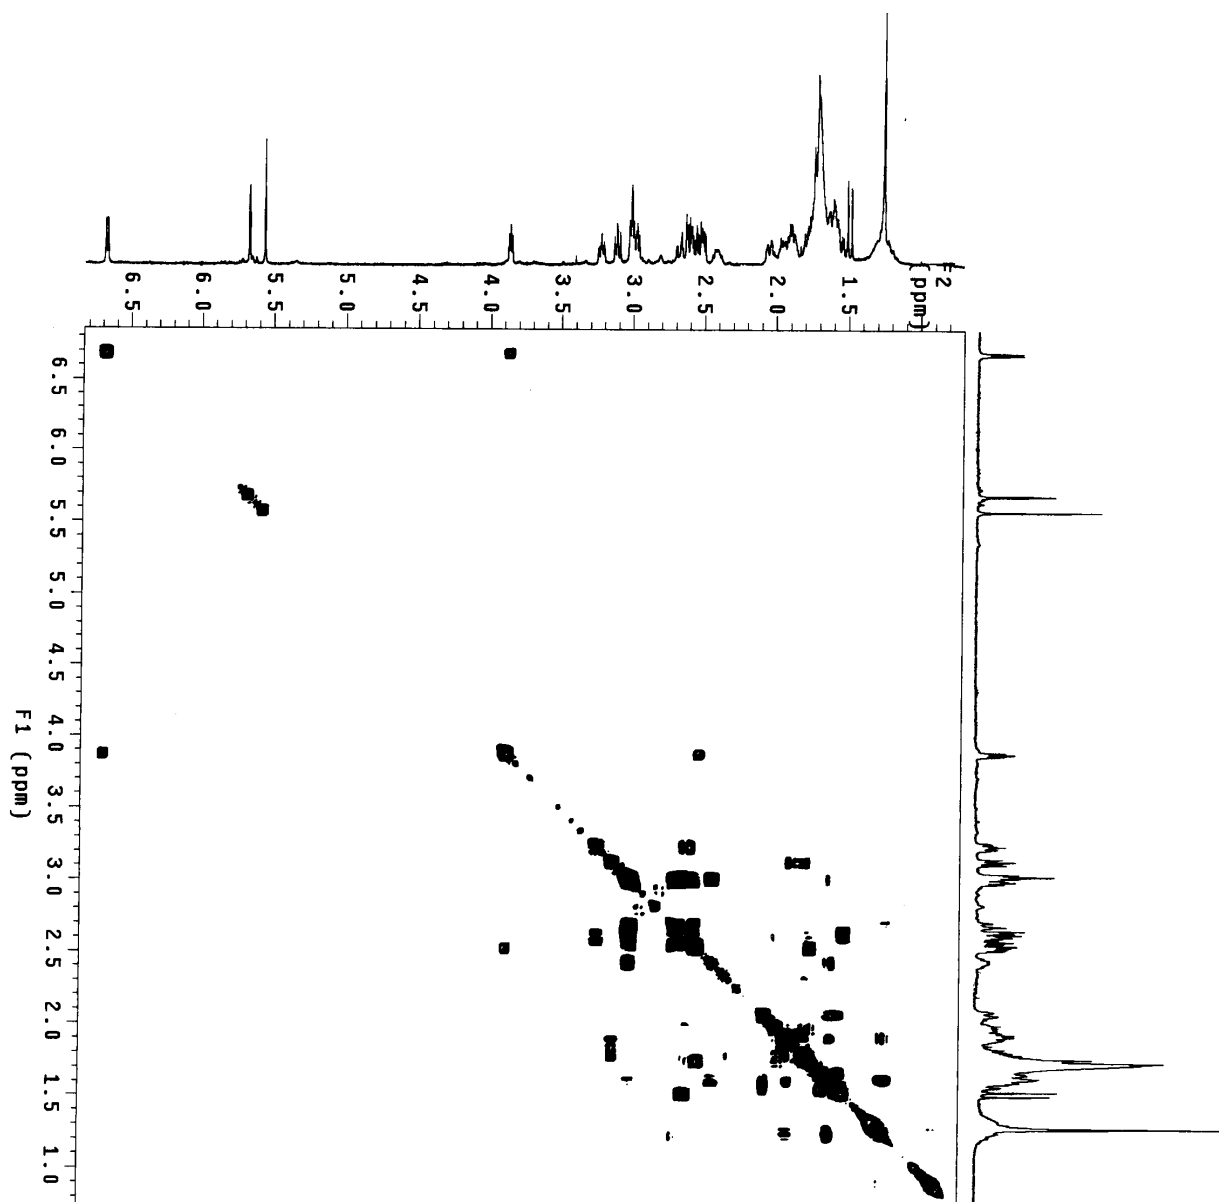



Figure S22. HSQC spectrum for flueggenine G (3) in CDCl<sub>3</sub>.

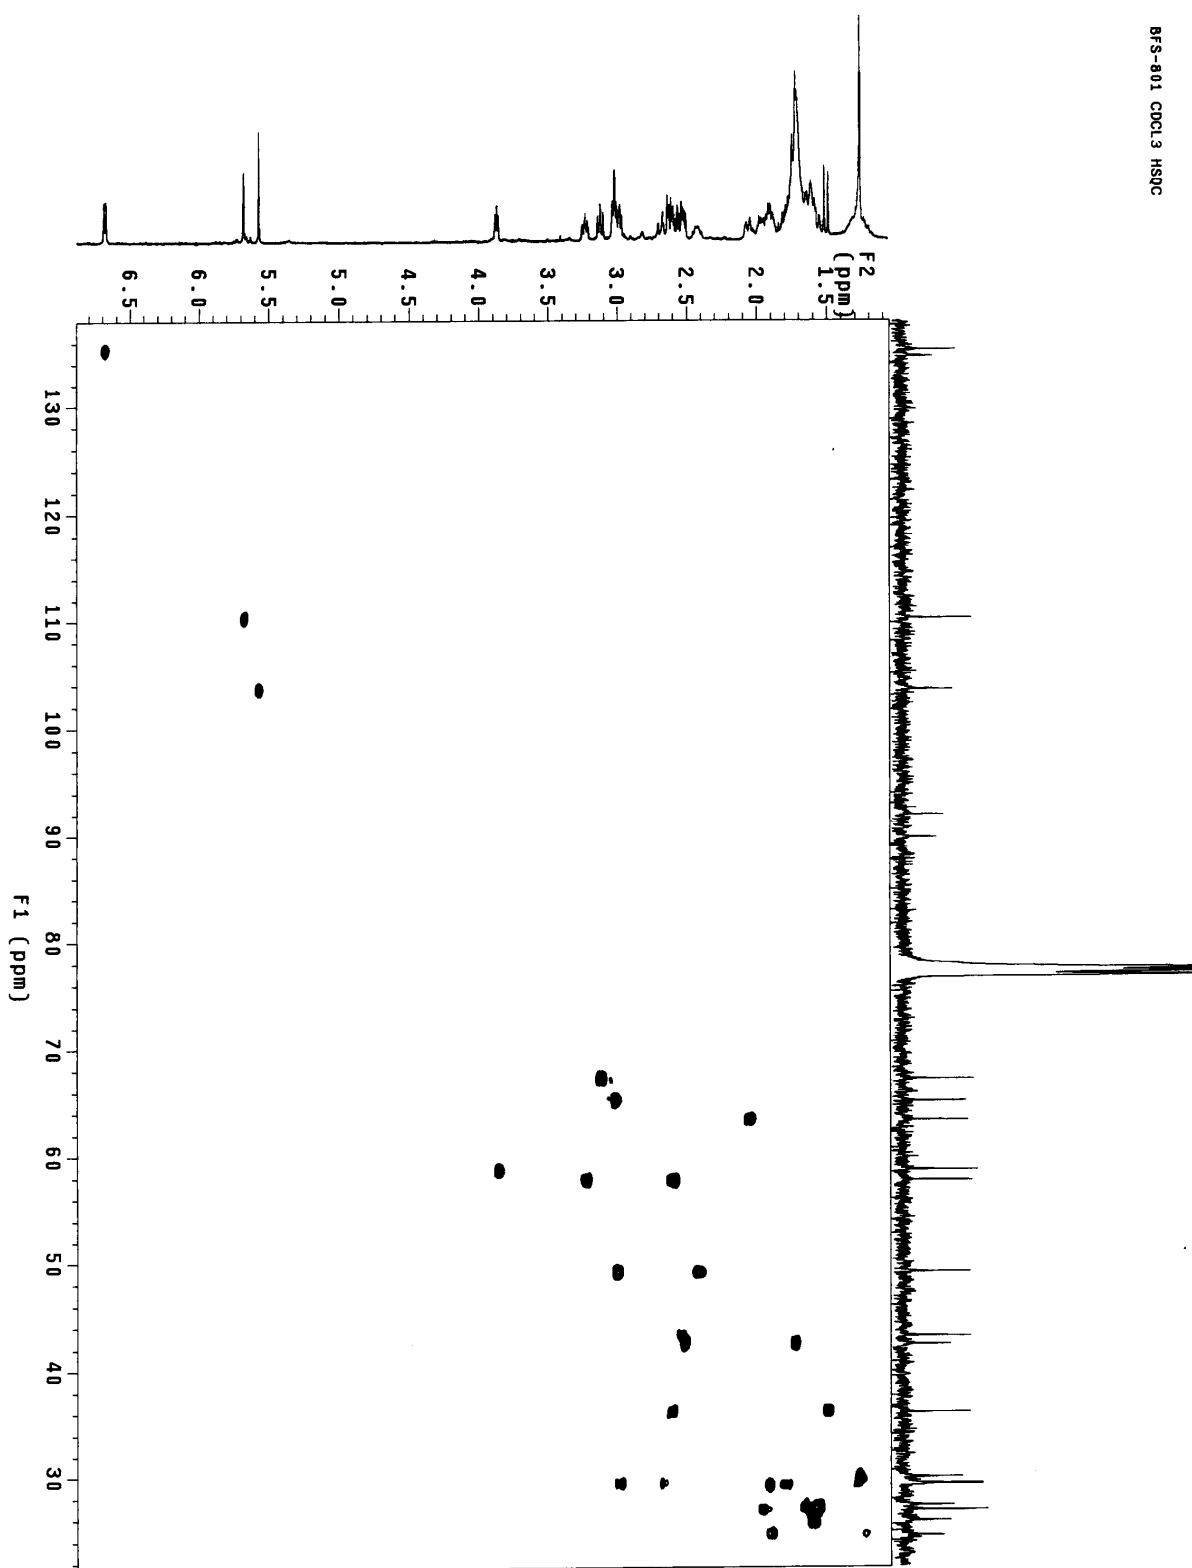

BFS-801 CDCL3 HSQC

Figure S23. HMBC spectrum for flueggein G (3) in CDCl<sub>3</sub>.

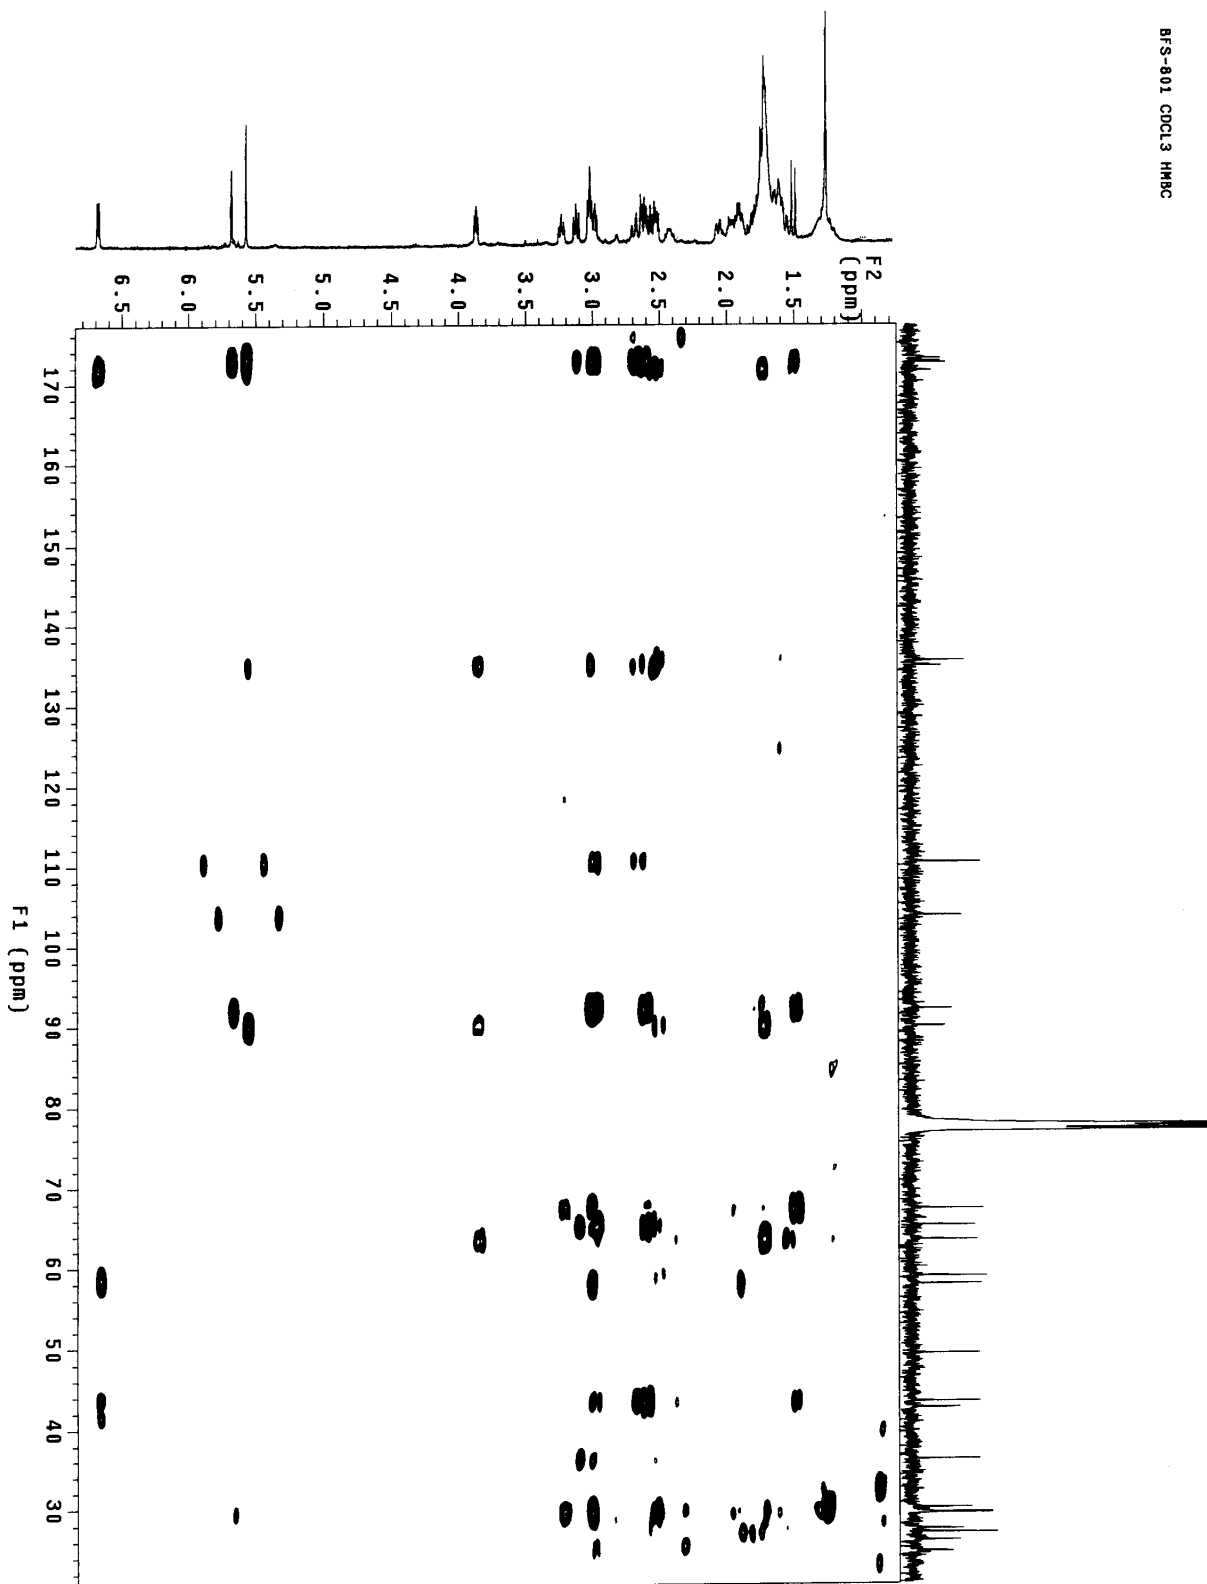

BFS-801 CDCl3 HMBC

Figure S24. ROESY spectrum for flueggenine G (3) in CDCl<sub>3</sub>

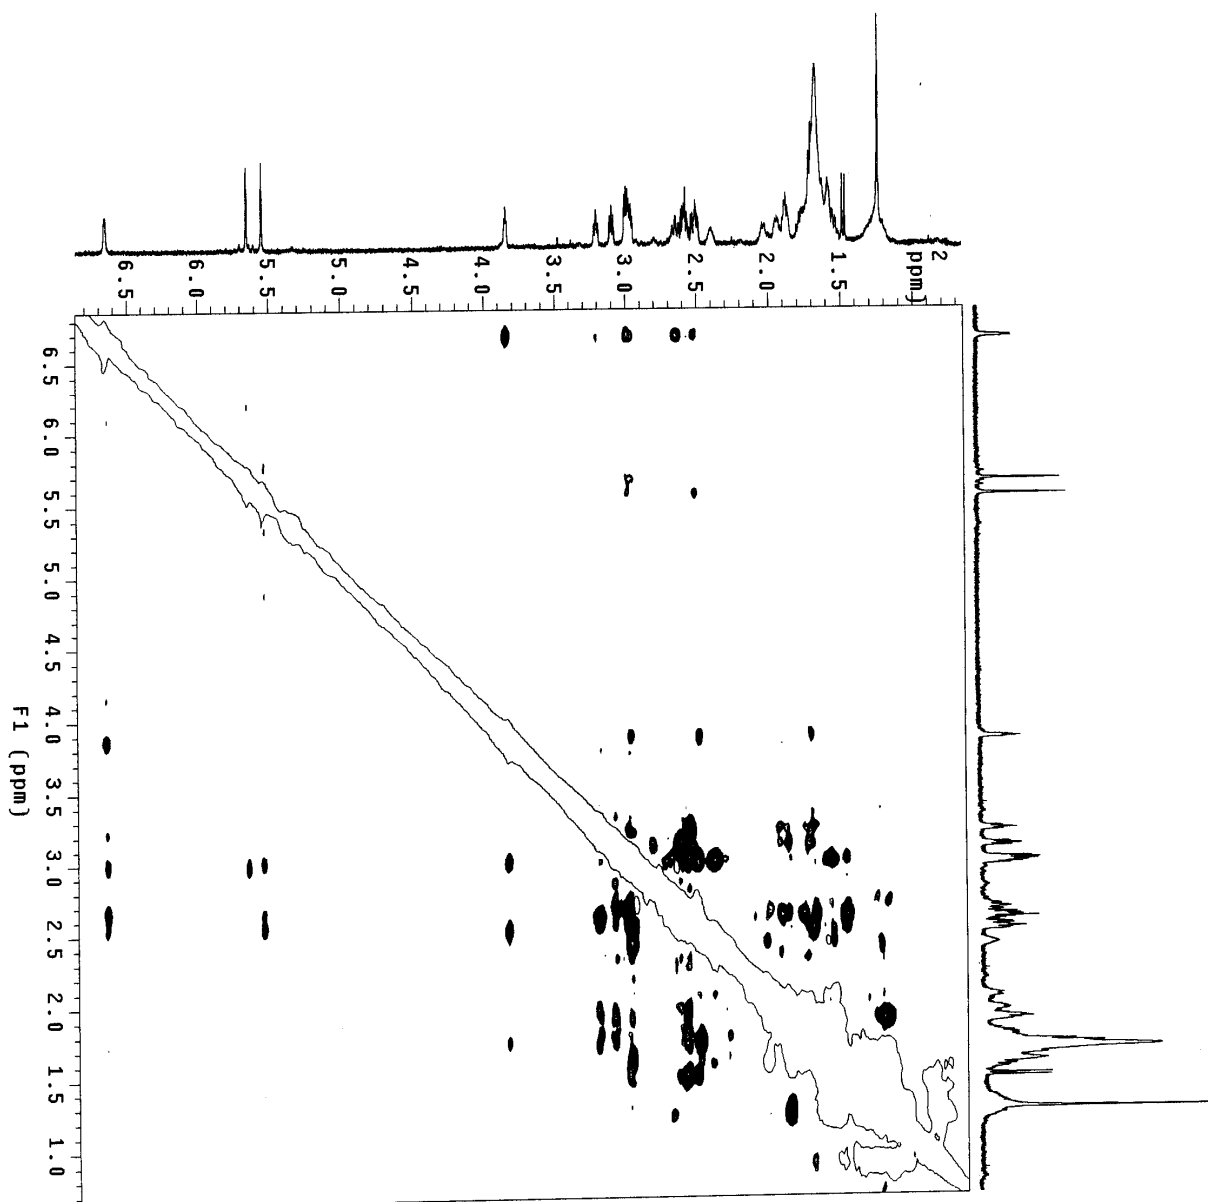

Figure S25. IR spectrum for flueggeine G (3).

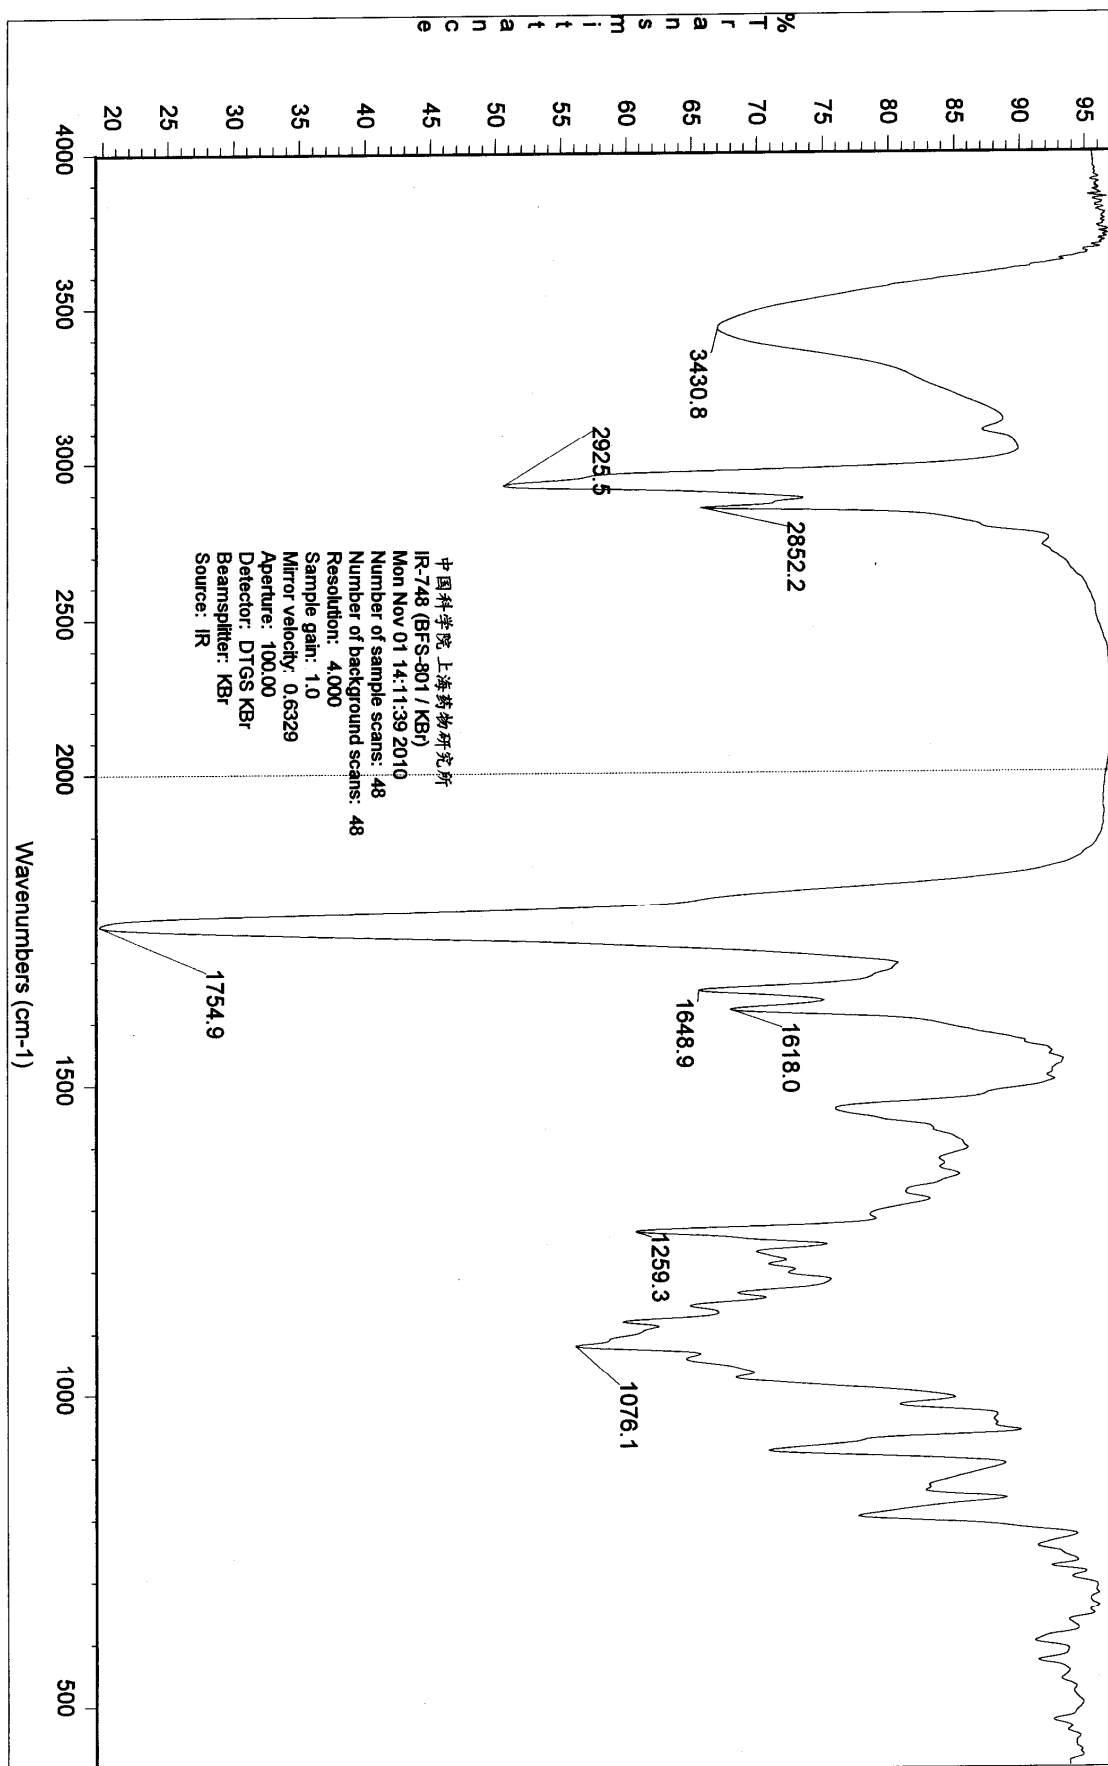

Figure S26. EIMS spectrum for flueggeine G (3).

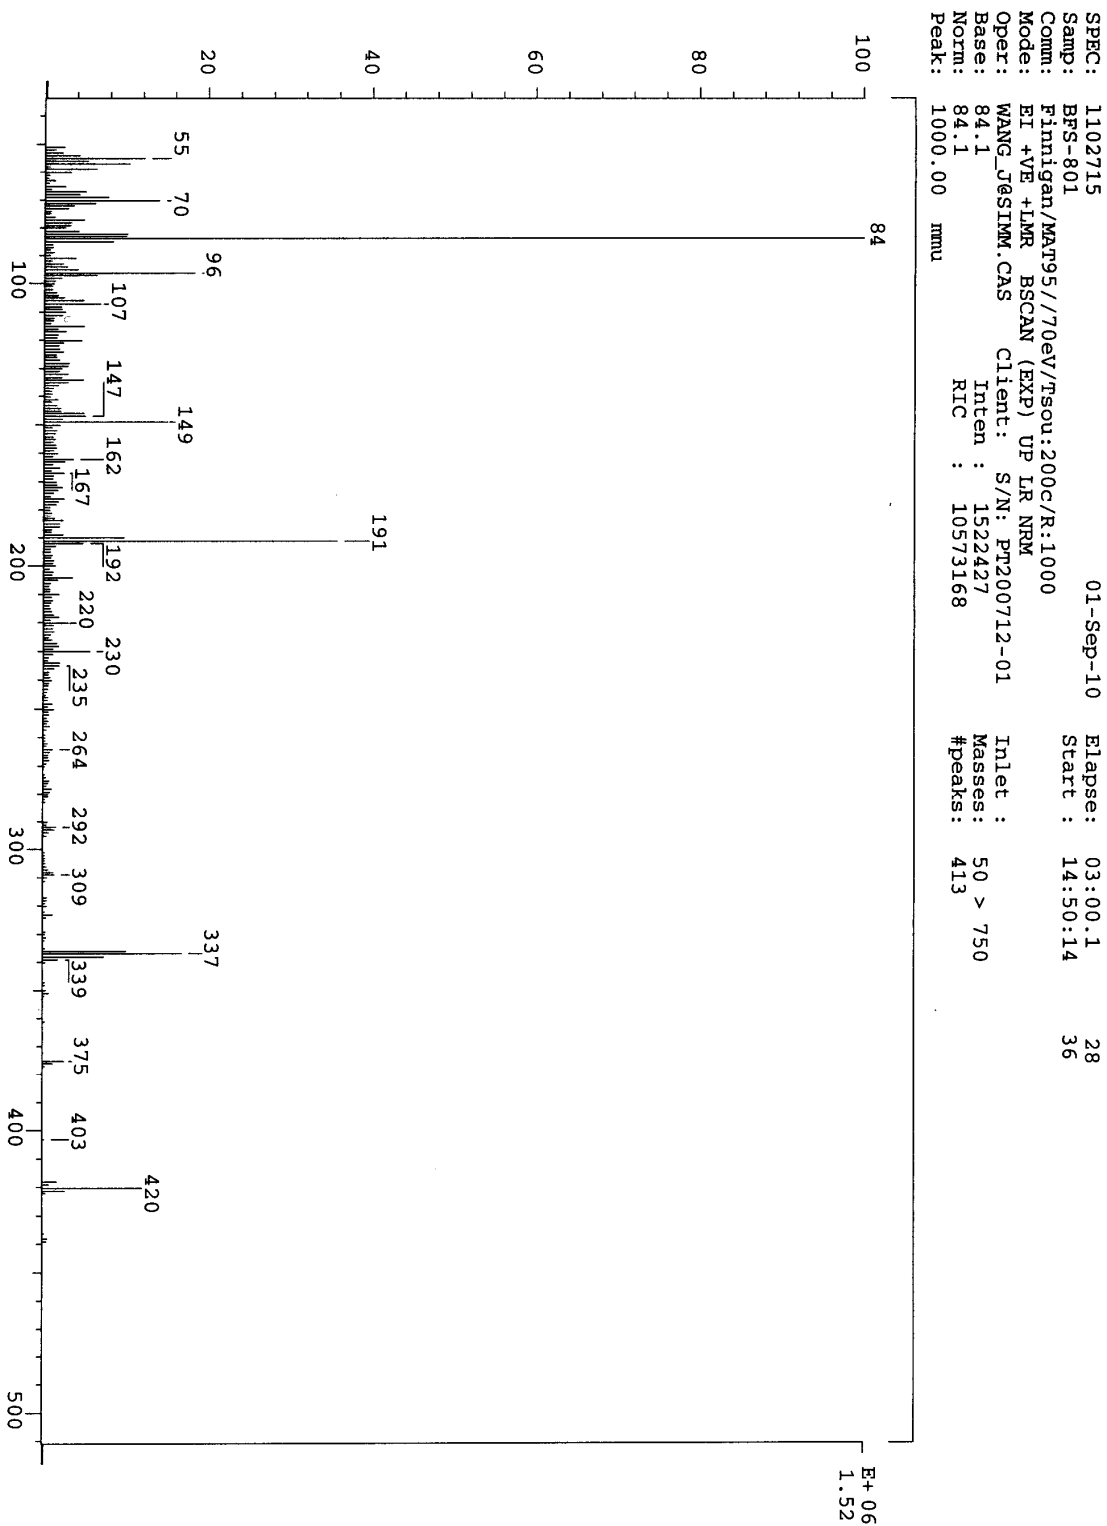

Figure S27. HREIMS spectrum for flueggeine G (3).

LIST: h102860-c1 Elapse: 03:52.8 18  
 Samp: BFS-801 Start : 15:06:33 29  
 Comm: Finnigan/MAT95//70eV/Tsou:200c/R:10000  
 Mode: EI +VE +LMR BSCAN (EXP) UP HR NRM  
 Oper: WANG\_J@SIMM.CAS Client: S/N: PT200712-01 Inlet :  
 Limt: ( 0 )  
 : ( 533 ) C27.H100.N2.O5  
 Peak: 1000.00 mmu R+D: -2.0 > 60.0  
 Data: CMASS : converted

| Mass     | Intensity | %RA    | %RIC | Delta | R+D  | Composition       |
|----------|-----------|--------|------|-------|------|-------------------|
| 70.06583 | * 37171   | 15.64  | 0.15 | -0.2  | 1.5  | C4.H8.N           |
| 71.08595 | * 12883   | 5.42   | 0.05 | 0.1   | 0.5  | C5.H11            |
| 77.03990 | * 9041    | 3.80   | 0.04 | -0.8  | 4.5  | C6.H5             |
| 78.04795 | * 9455    | 3.98   | 0.04 | -1.0  | 4.0  | C6.H6             |
| 82.06525 | * 19679   | 8.28   | 0.08 | 0.4   | 2.5  | C5.H8.N           |
|          |           |        |      |       | -2.3 | -2.0 C2.H10.O3    |
| 83.07255 | * 12469   | 5.25   | 0.05 | 0.9   | 2.0  | C5.H9.N           |
| 83.08556 | * 9219    | 3.88   | 0.04 | 0.5   | 1.5  | C6.H11            |
| 84.08089 | * 237627  | 100.00 | 0.98 | 0.4   | 1.5  | C5.H10.N          |
| 85.08450 | * 9041    | 3.80   | 0.04 |       |      |                   |
| 91.05436 | * 8037    | 3.38   | 0.03 | 0.4   | 4.5  | C7.H7             |
| 96.08174 | * 40126   | 16.89  | 0.17 | -0.4  | 2.5  | C6.H10.N          |
| 106.0397 | * 9100    | 3.83   | 0.04 | -1.9  | 1.0  | C2.H6.N2.O3       |
|          |           |        |      |       | 2.1  | 5.0 C7.H6.O       |
| 107.0719 | * 11582   | 4.87   | 0.05 | -1.1  | -0.5 | C4.H11.O3         |
|          |           |        |      |       | 1.6  | 4.0 C7.H9.N       |
| 115.0545 | * 9573    | 4.03   | 0.04 | 0.3   | 6.5  | C9.H7             |
| 146.0970 | * 8096    | 3.41   | 0.03 | 0.0   | 5.5  | C10.H12.N         |
|          |           |        |      |       | -2.7 | 1.0 C7.H14.O3     |
| 147.1043 | * 7741    | 3.26   | 0.03 | 0.5   | 5.0  | C10.H13.N         |
|          |           |        |      |       | -2.1 | 0.5 C7.H15.O3     |
| 149.0231 | * 21452   | 9.03   | 0.09 | 0.8   | 6.5  | C8.H5.O3          |
| 162.0912 | * 7446    | 3.13   | 0.03 | 0.7   | 5.5  | C10.H12.N.O       |
|          |           |        |      |       | -2.0 | 1.0 C7.H14.O4     |
| 190.0874 | * 26593   | 11.19  | 0.11 | -0.6  | 6.5  | C11.H12.N.O2      |
| 191.0949 | * 85985   | 36.18  | 0.36 | -0.3  | 6.0  | C11.H13.N.O2      |
|          |           |        |      |       | -2.9 | 1.5 C8.H15.O5     |
| 192.0991 | * 8982    | 3.78   | 0.04 | 0.6   | 1.0  | C8.H16.O5         |
| 230.1187 | * 11110   | 4.68   | 0.05 | -0.6  | 7.5  | C14.H16.N.O2      |
| 258.9797 | * 11346   | 4.77   | 0.05 |       |      |                   |
| 308.9754 | * 11760   | 4.95   | 0.05 |       |      |                   |
| 336.1247 | * 19679   | 8.28   | 0.08 | -1.2  | 12.5 | C20.H18.N.O4      |
|          |           |        |      |       | 1.5  | 17.0 C23.H16.N2.O |
| 337.1310 | * 45858   | 19.30  | 0.19 | 0.5   | 12.0 | C20.H19.N.O4      |
| 338.1350 | * 18851   | 7.93   | 0.08 |       |      |                   |
| 358.9720 | * 11110   | 4.68   | 0.05 |       |      |                   |
| 359.9829 | * 7446    | 3.13   | 0.03 | 1.9   | 27.0 | C26.O3            |
|          |           |        |      |       | -2.1 | 23.0 C21.N2.O5    |
| 367.9784 | * 8037    | 3.38   | 0.03 |       |      |                   |
| 405.9799 | * 12114   | 5.10   | 0.05 | -2.2  | 27.5 | C26.N.O5          |
| 420.2049 | * 27716   | 11.66  | 0.11 | 0.0   | 13.0 | C25.H28.N2.O4     |
| 420.9689 | * 8273    | 3.48   | 0.03 |       |      |                   |



Figure S29.  $^{13}\text{C}$  NMR spectrum for flueggein H (**4**) in  $\text{CDCl}_3$  (5%  $\text{CD}_3\text{OD}$ ).

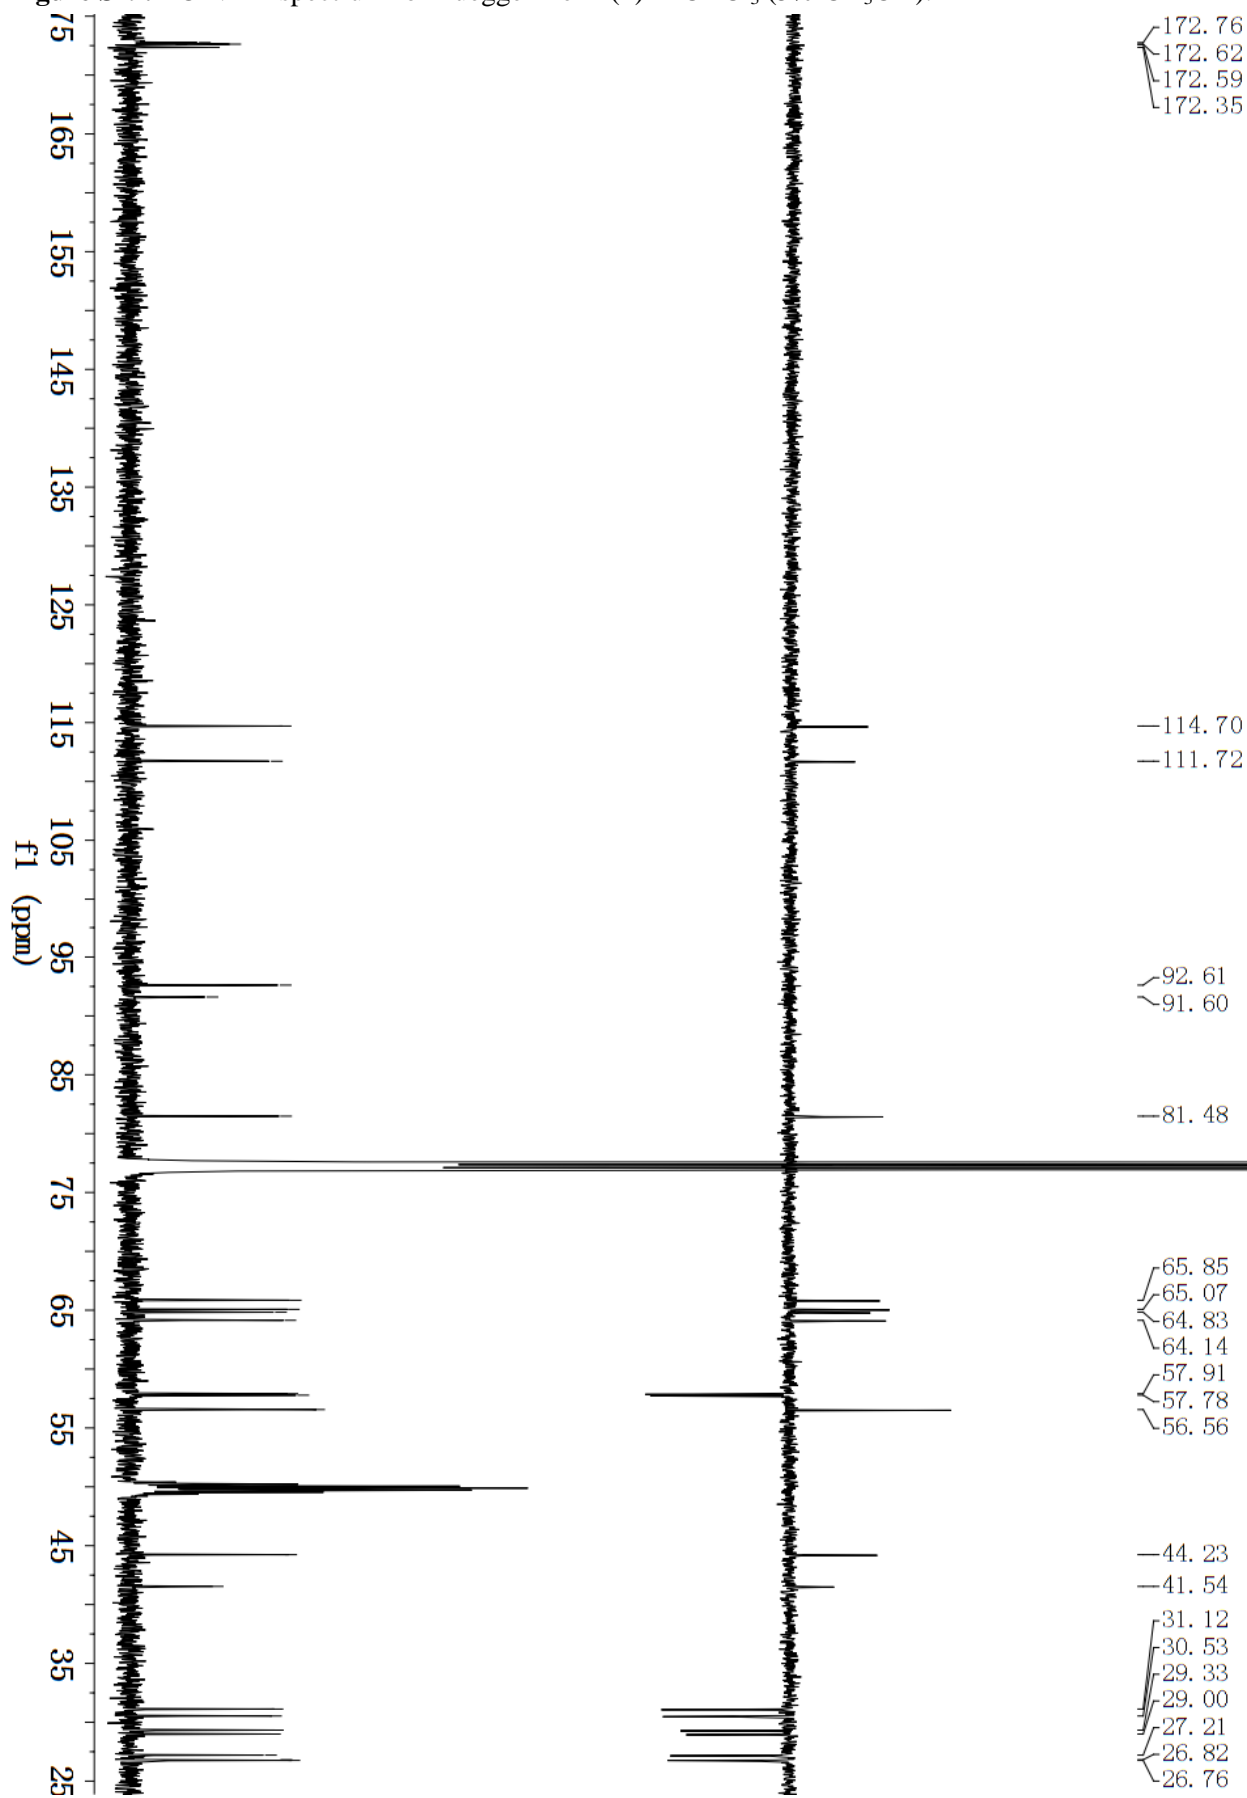



**Figure S30.**  $^1\text{H}$ - $^1\text{H}$  COSY spectrum for flueggeine H (**4**) in  $\text{CDCl}_3$  (5%  $\text{CD}_3\text{OD}$ ).

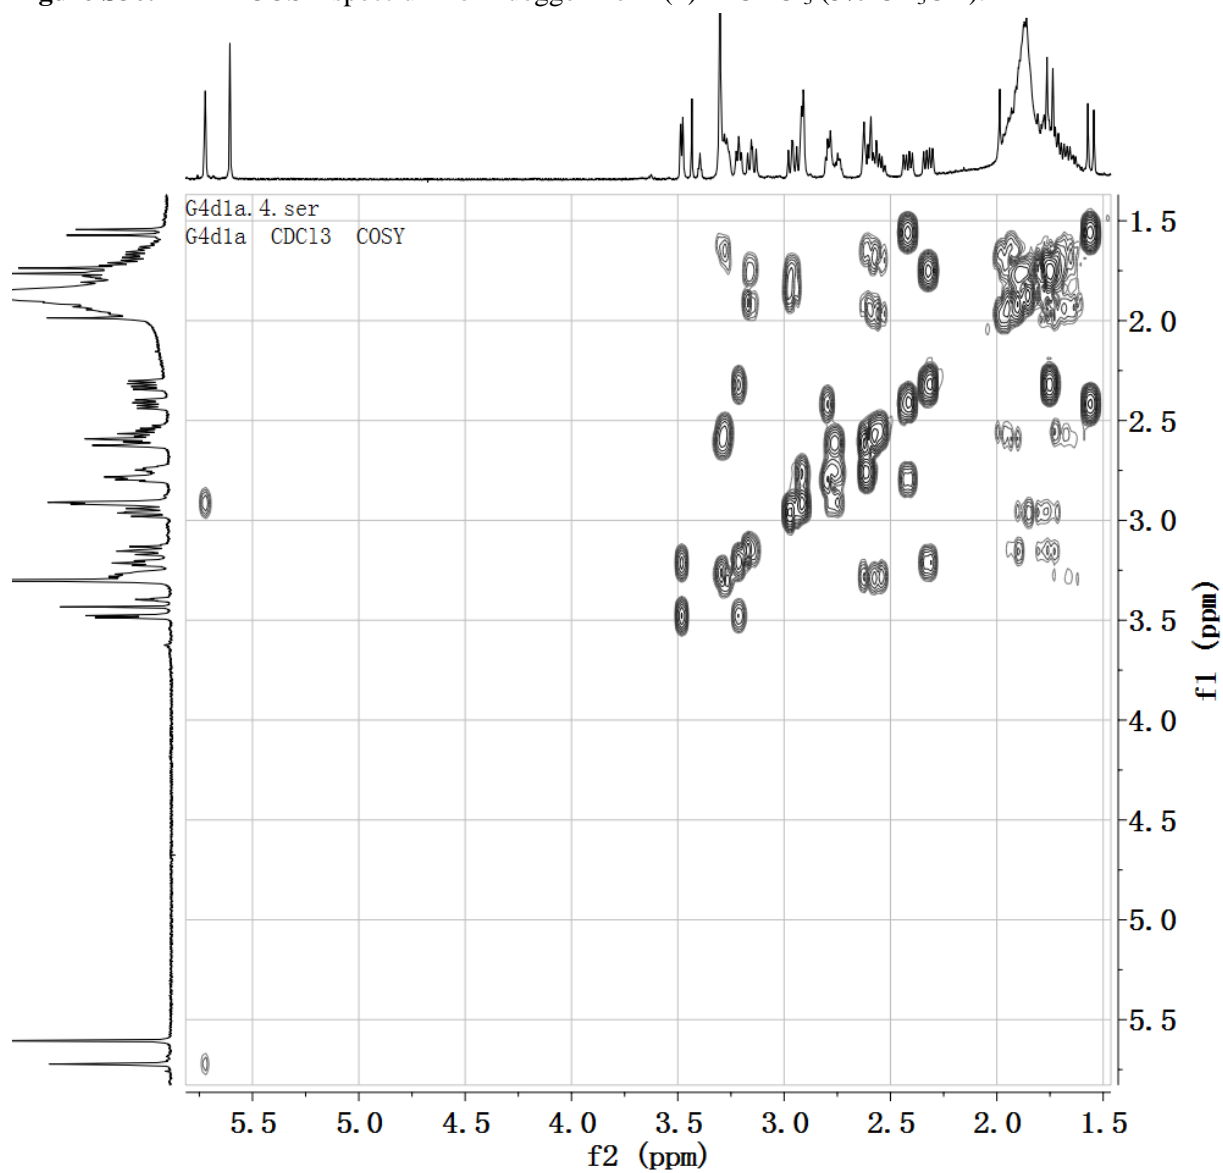

Figure S31. HSQC spectrum for flueggeine H (4) in CDCl<sub>3</sub> (5% CD<sub>3</sub>OD).

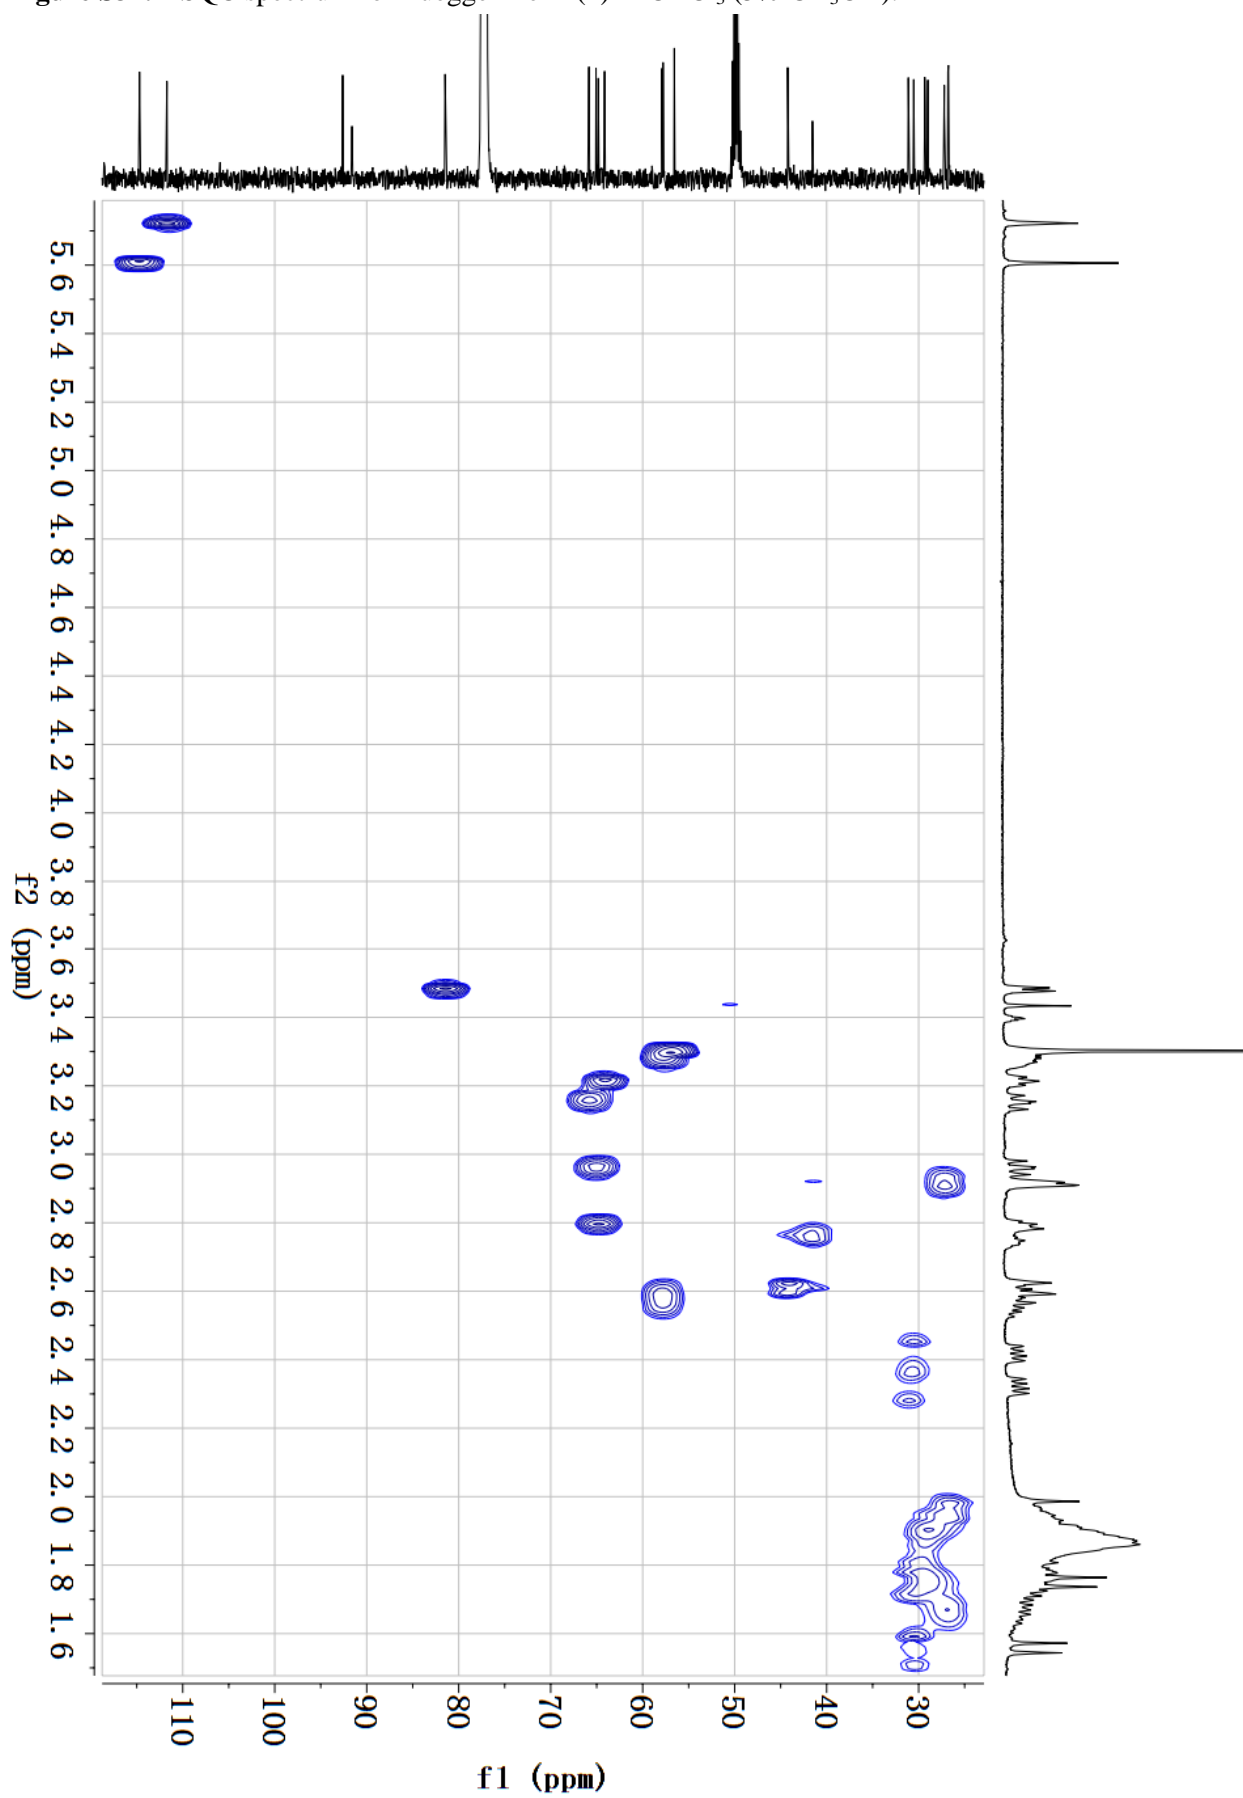

Figure S32. HMBC spectrum for flueggeine H (4) in CDCl<sub>3</sub> (5% CD<sub>3</sub>OD).

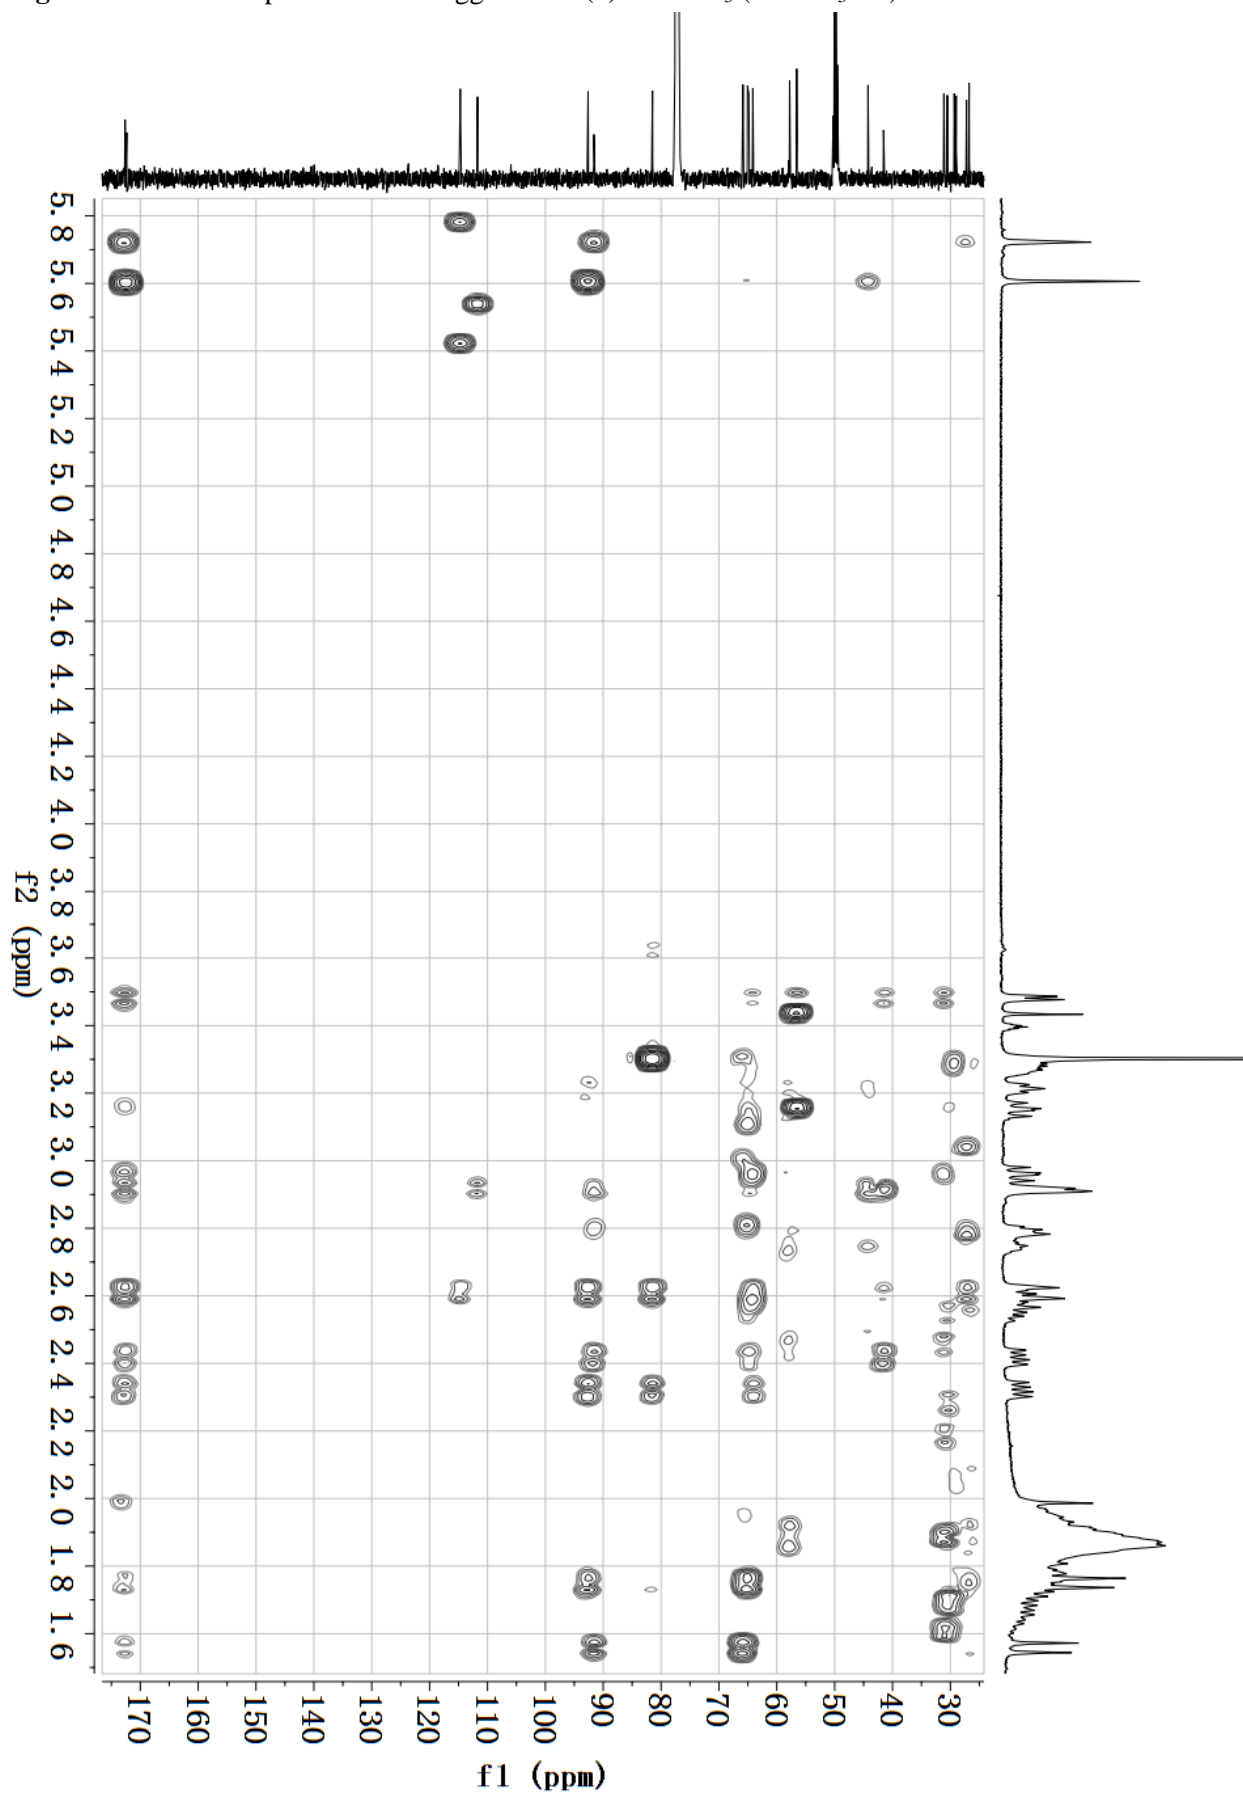

Figure S33. ROESY spectrum for flueggeine H (4) in CDCl<sub>3</sub> (5% CD<sub>3</sub>OD).

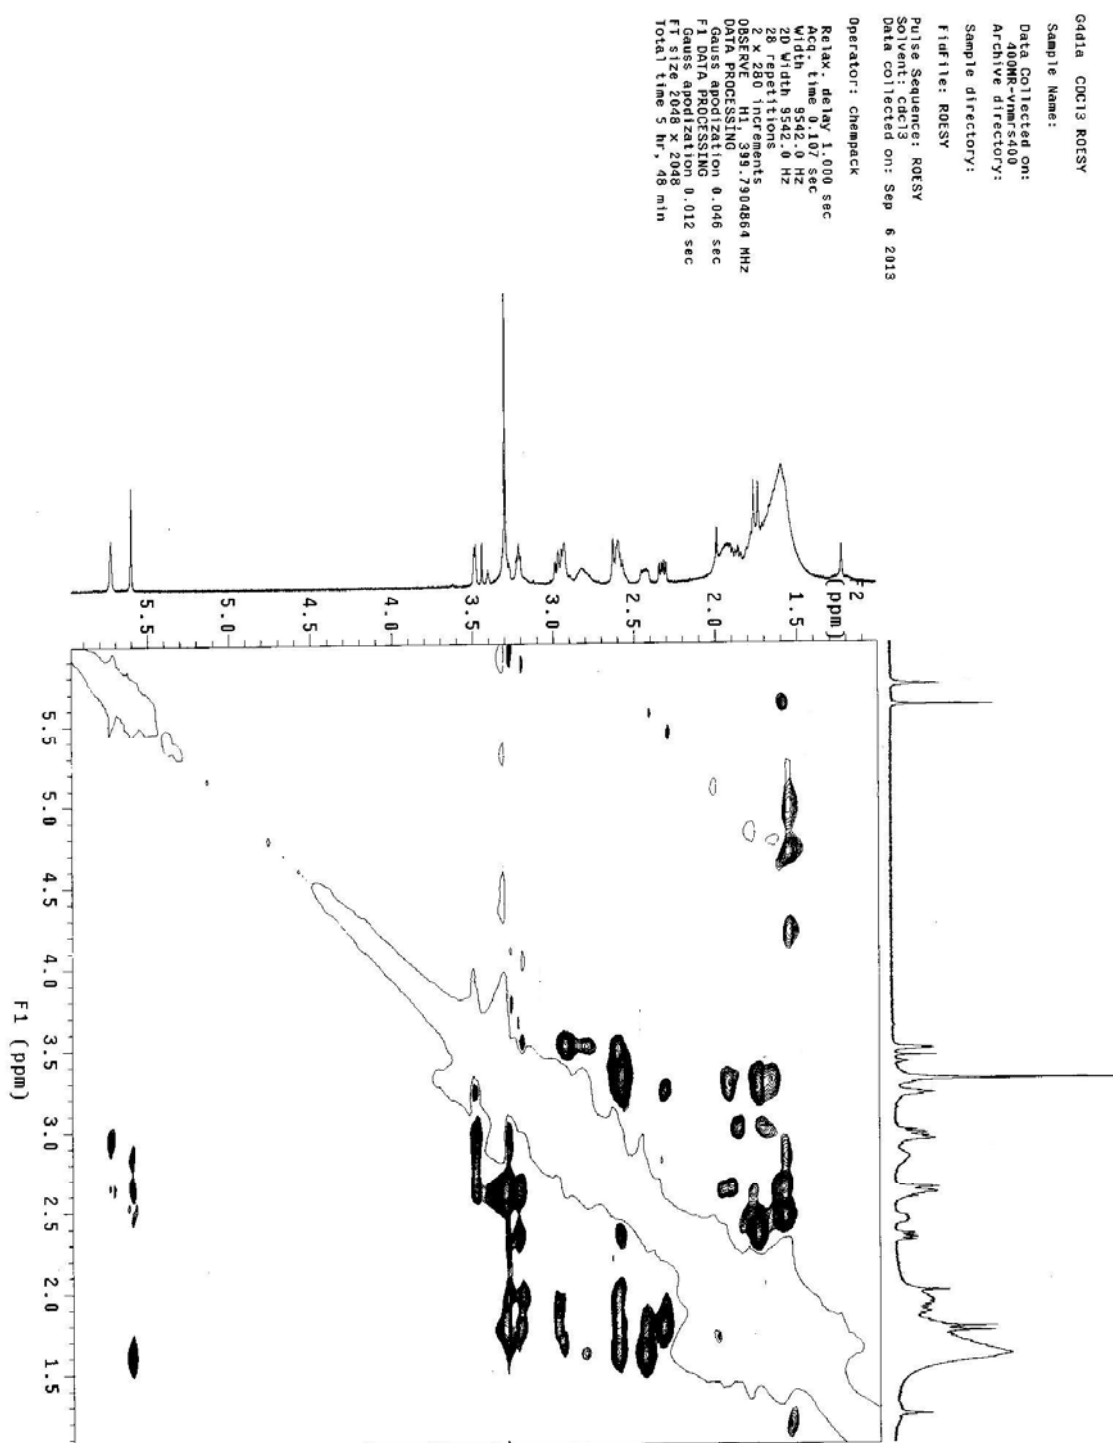

Figure S34. IR spectrum for flueggenine H (4).

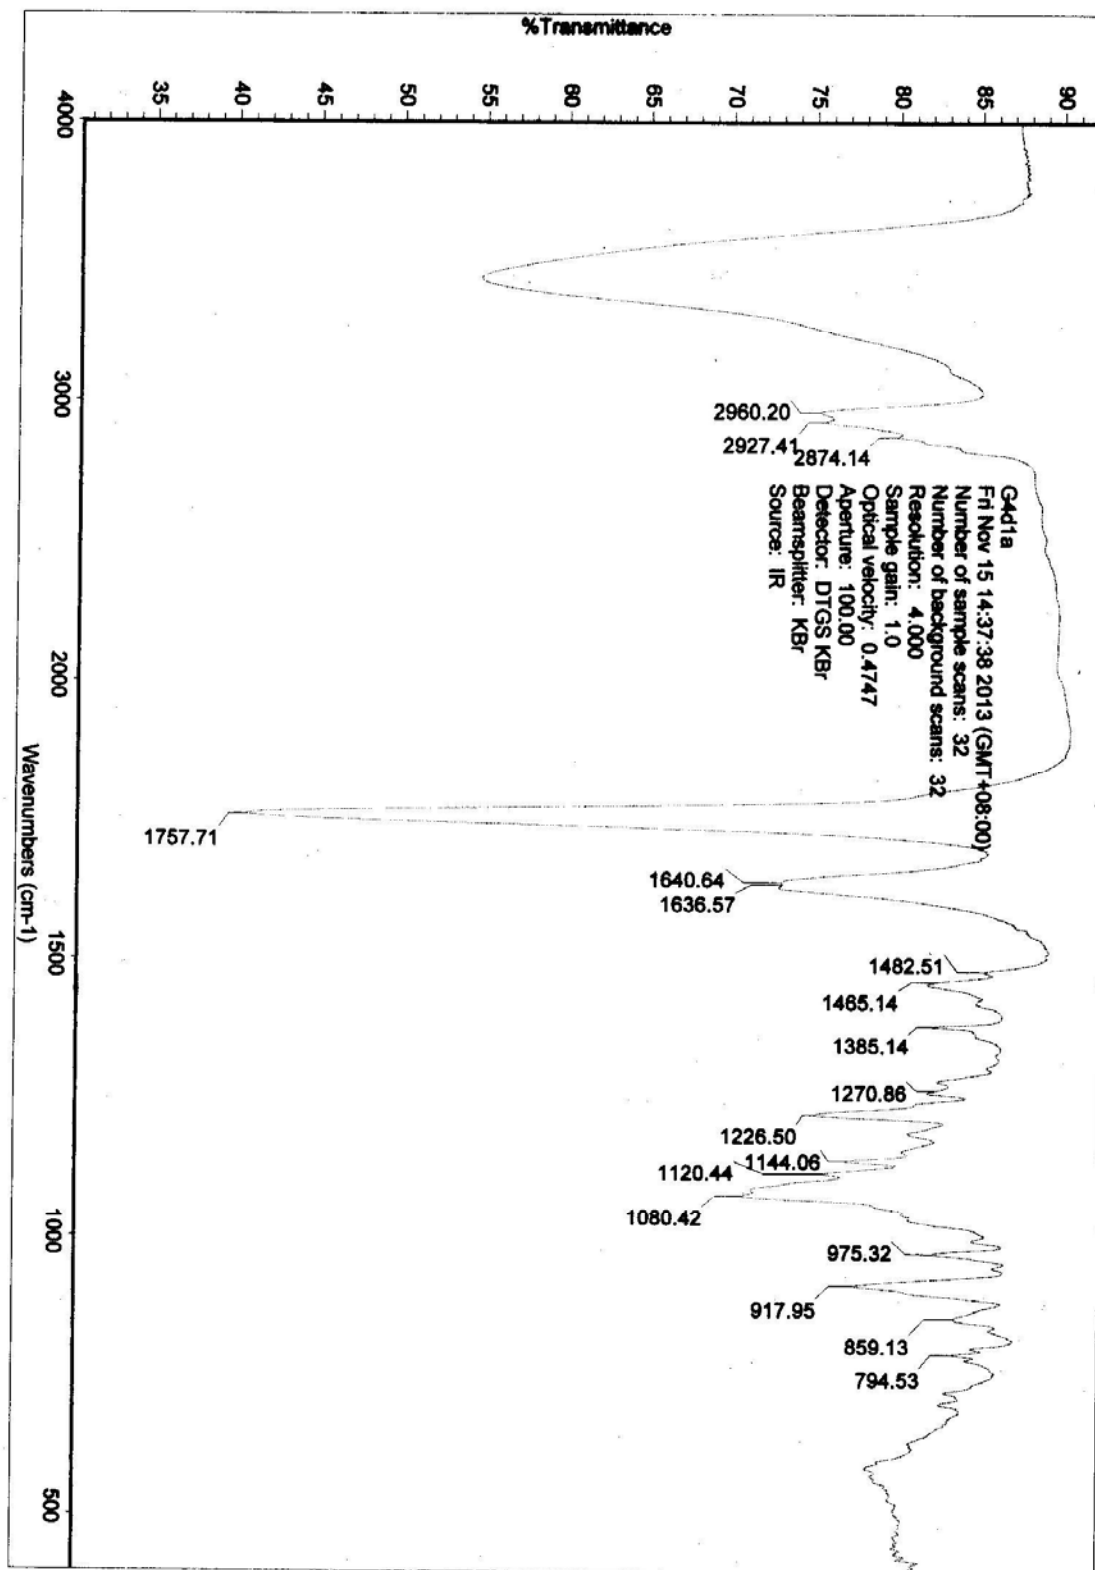

Figure S35. (+)-ESIMS spectrum for flueggeanine H (4).

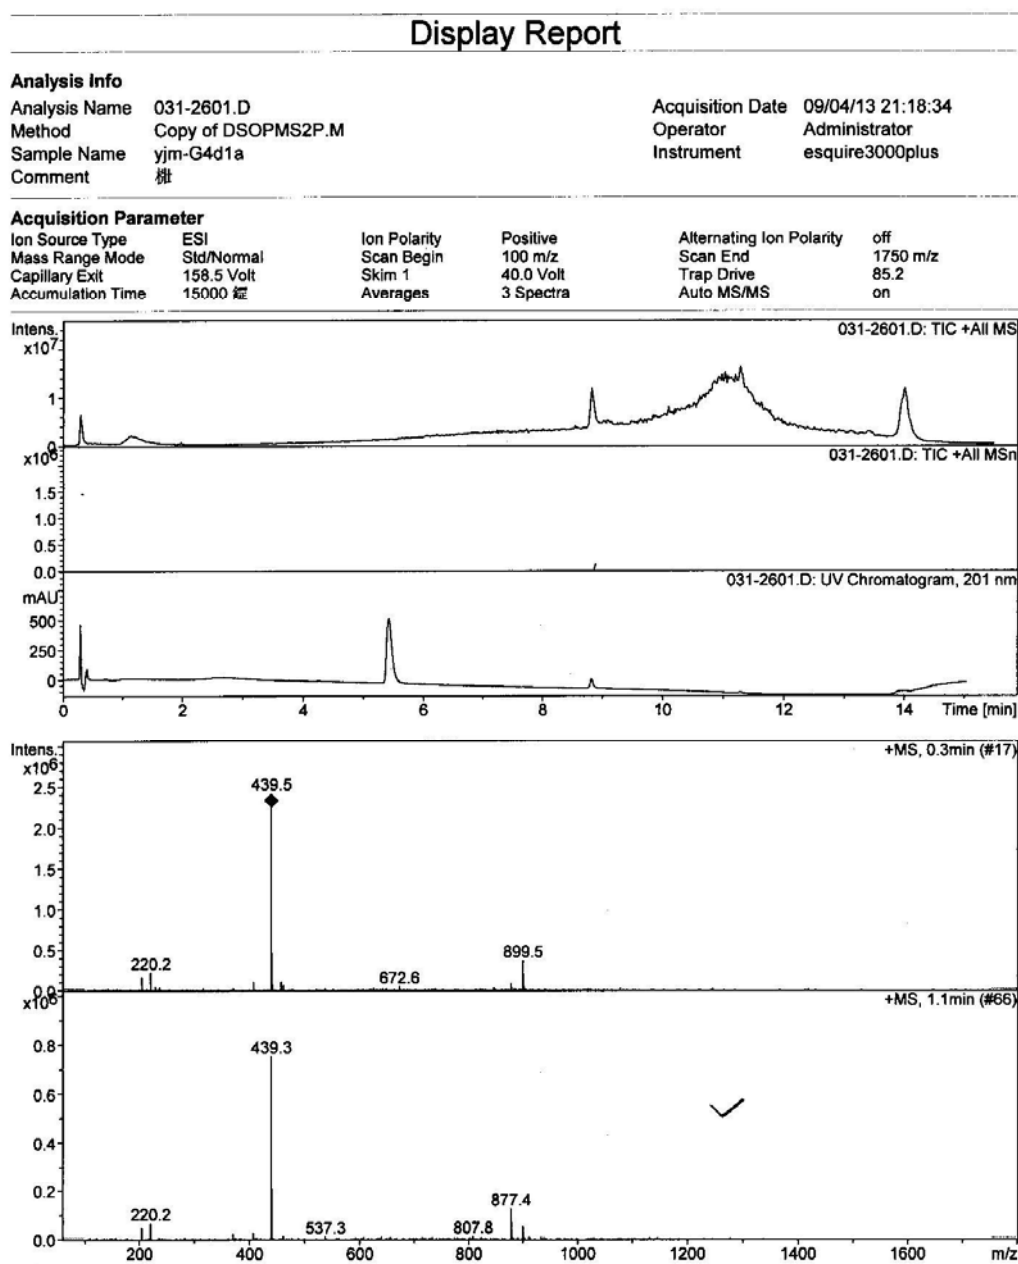

Figure S36. (+)-HRESIMS spectrum for flueggeine H (4).

Elemental Composition Report

Single Mass Analysis

Tolerance = 5.0 PPM / DBE: min = -1.5, max = 50.0

Element prediction: Off

Number of isotope peaks used for i-FIT = 3

Monoisotopic Mass, Even Electron Ions

249 formula(e) evaluated with 1 results within limits (up to 50 closest results for each mass)

Elements Used:

C: 5-80 H: 2-120 N: 0-2 O: 0-20

G4d1a

LCT PXE KE324

13-Sep-2013

15:12:40

G4d1a\_0913 5 (0.107) AM2 (Ar,10000.0,0.00,1.00); ABS; Cm (5.21)

1: TOF MS ES+

1.13e+004

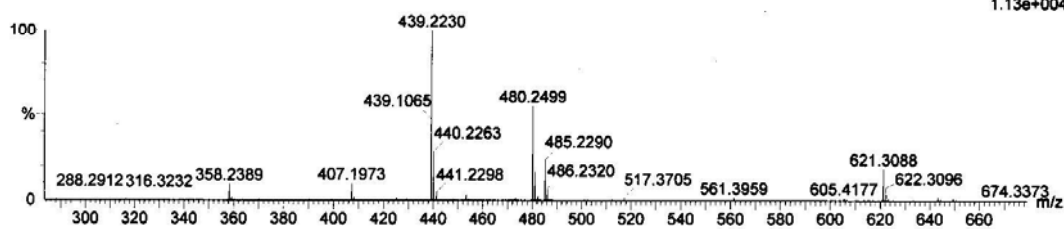

Minimum:

Maximum: 3.0 5.0 -1.5

Maximum: 50.0

| Mass     | Calc. Mass | mDa  | PPM  | DBE  | i-FIT | i-FIT (Norm) | Formula       |
|----------|------------|------|------|------|-------|--------------|---------------|
| 439.2230 | 439.2233   | -0.3 | -0.7 | 11.5 | 114.2 | 0.0          | C25 H31 N2 O5 |

Figure S37.  $^1\text{H}$  NMR spectrum for flueggeine I (**5**) in  $\text{CDCl}_3$ .

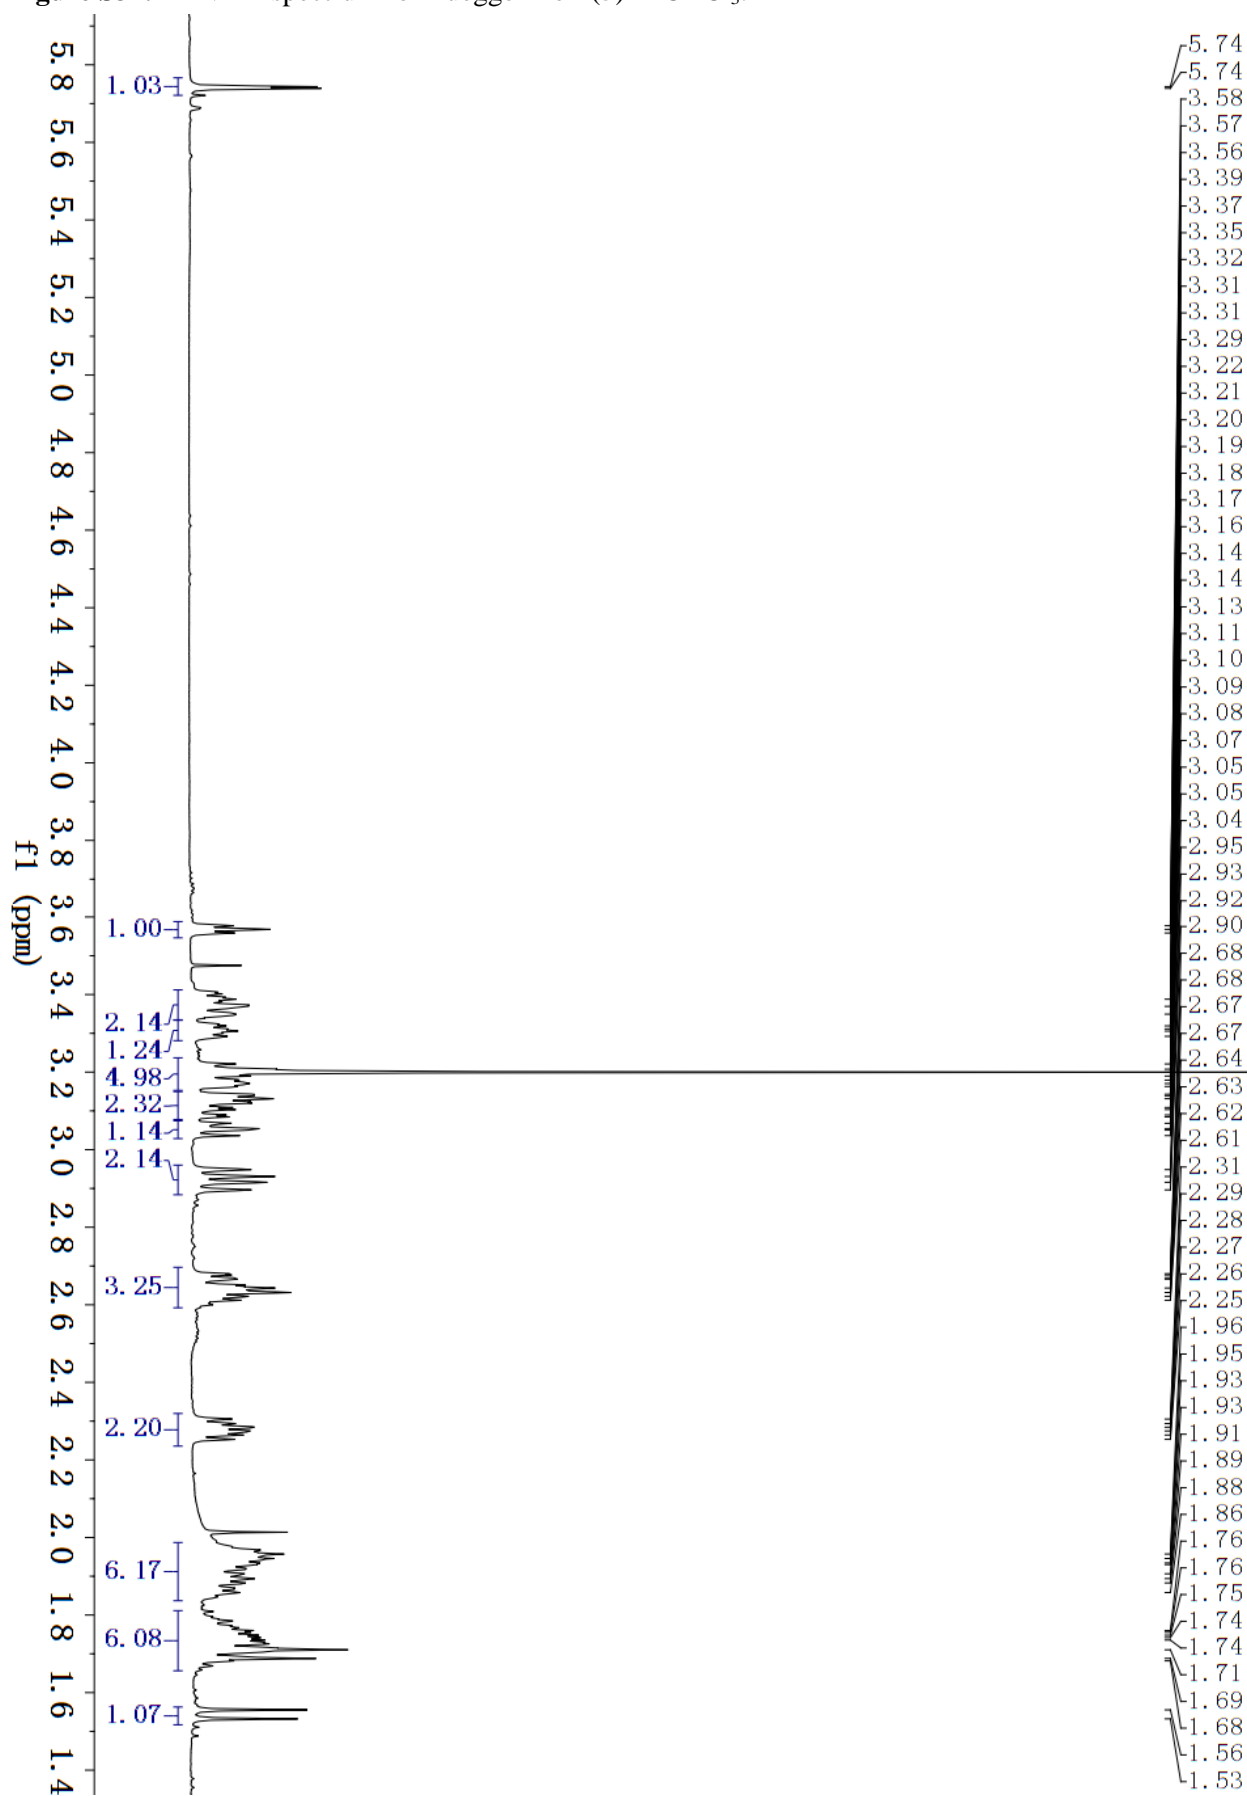



Figure S38.  $^{13}\text{C}$  NMR spectrum for flueggein I (5) in  $\text{CDCl}_3$ .

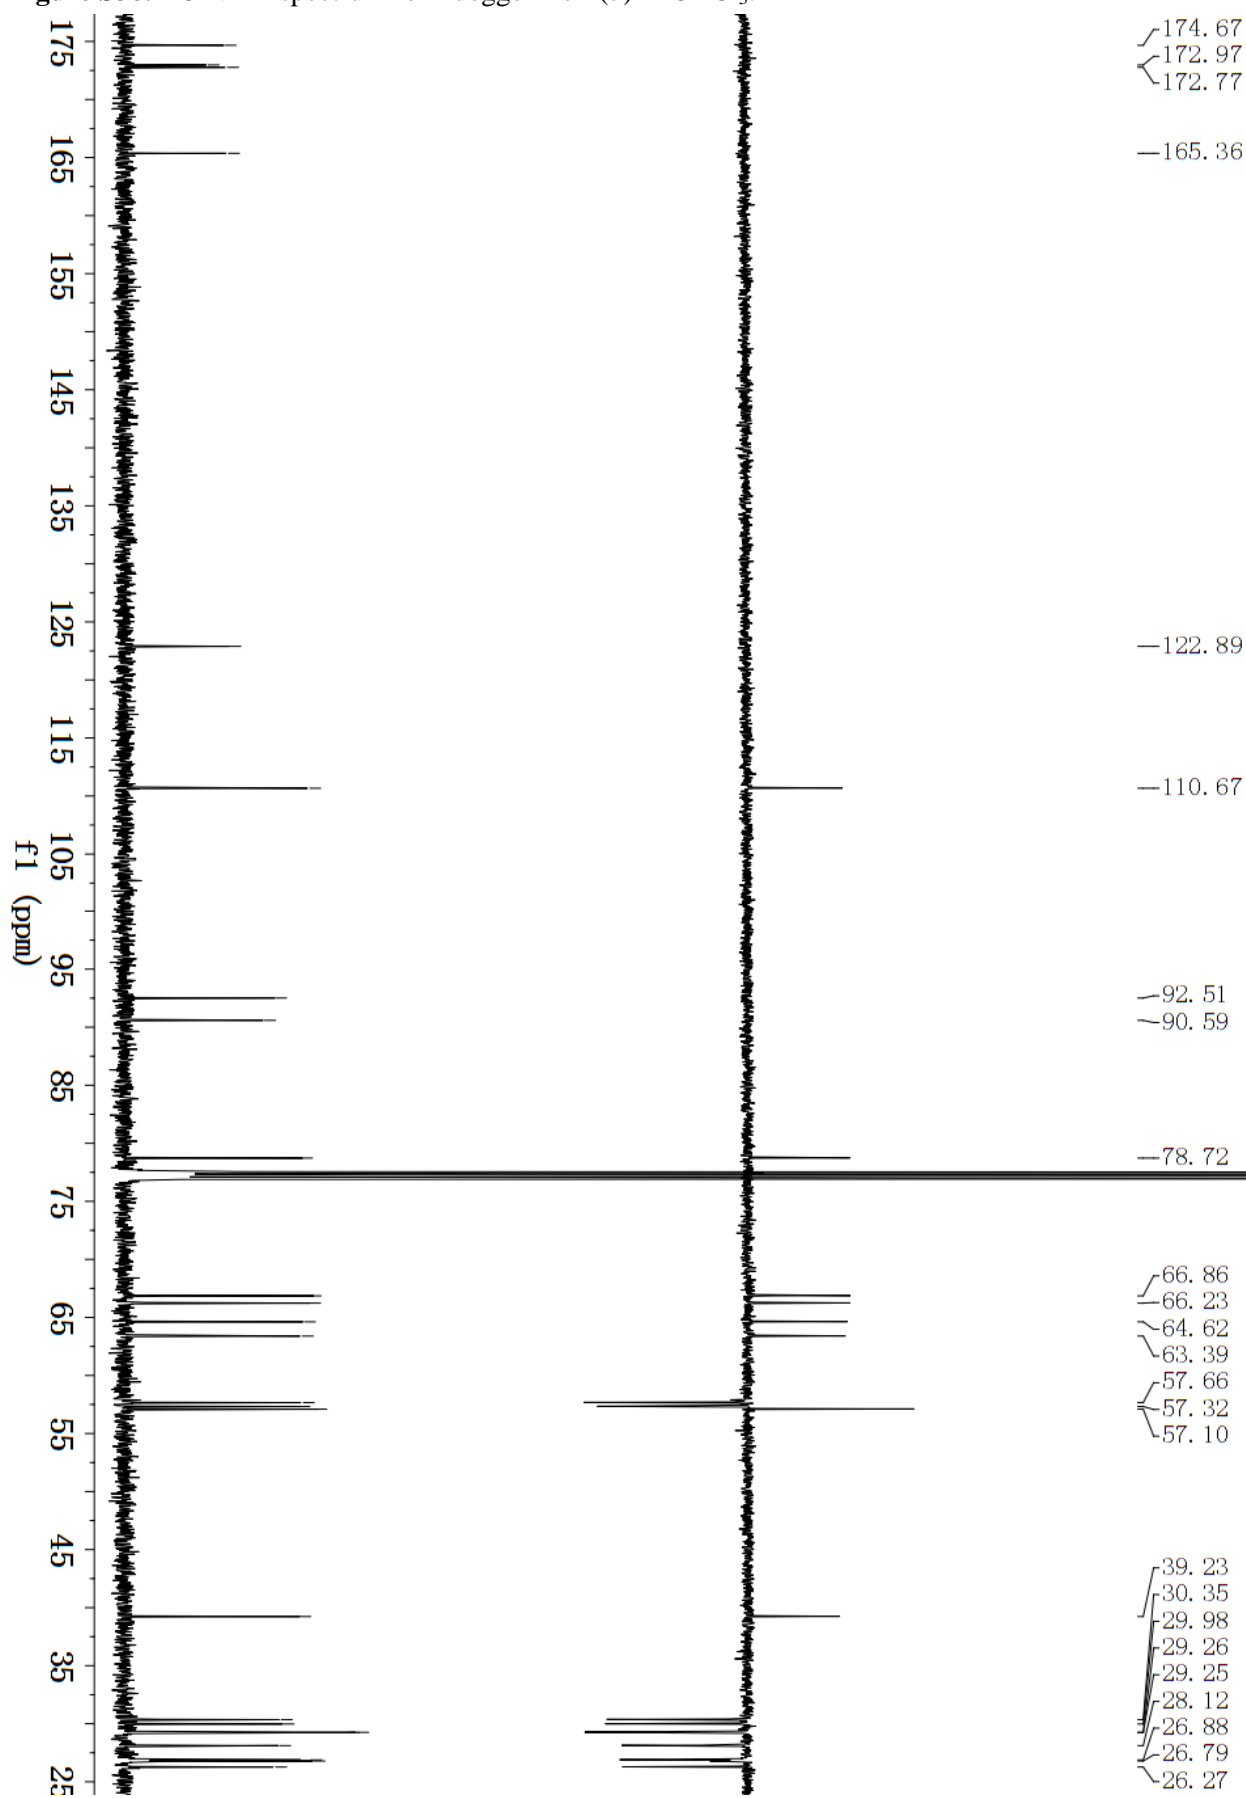

Figure S39.  $^1\text{H}$ - $^1\text{H}$  COSY spectrum for flueggeine I (5) in  $\text{CDCl}_3$ .

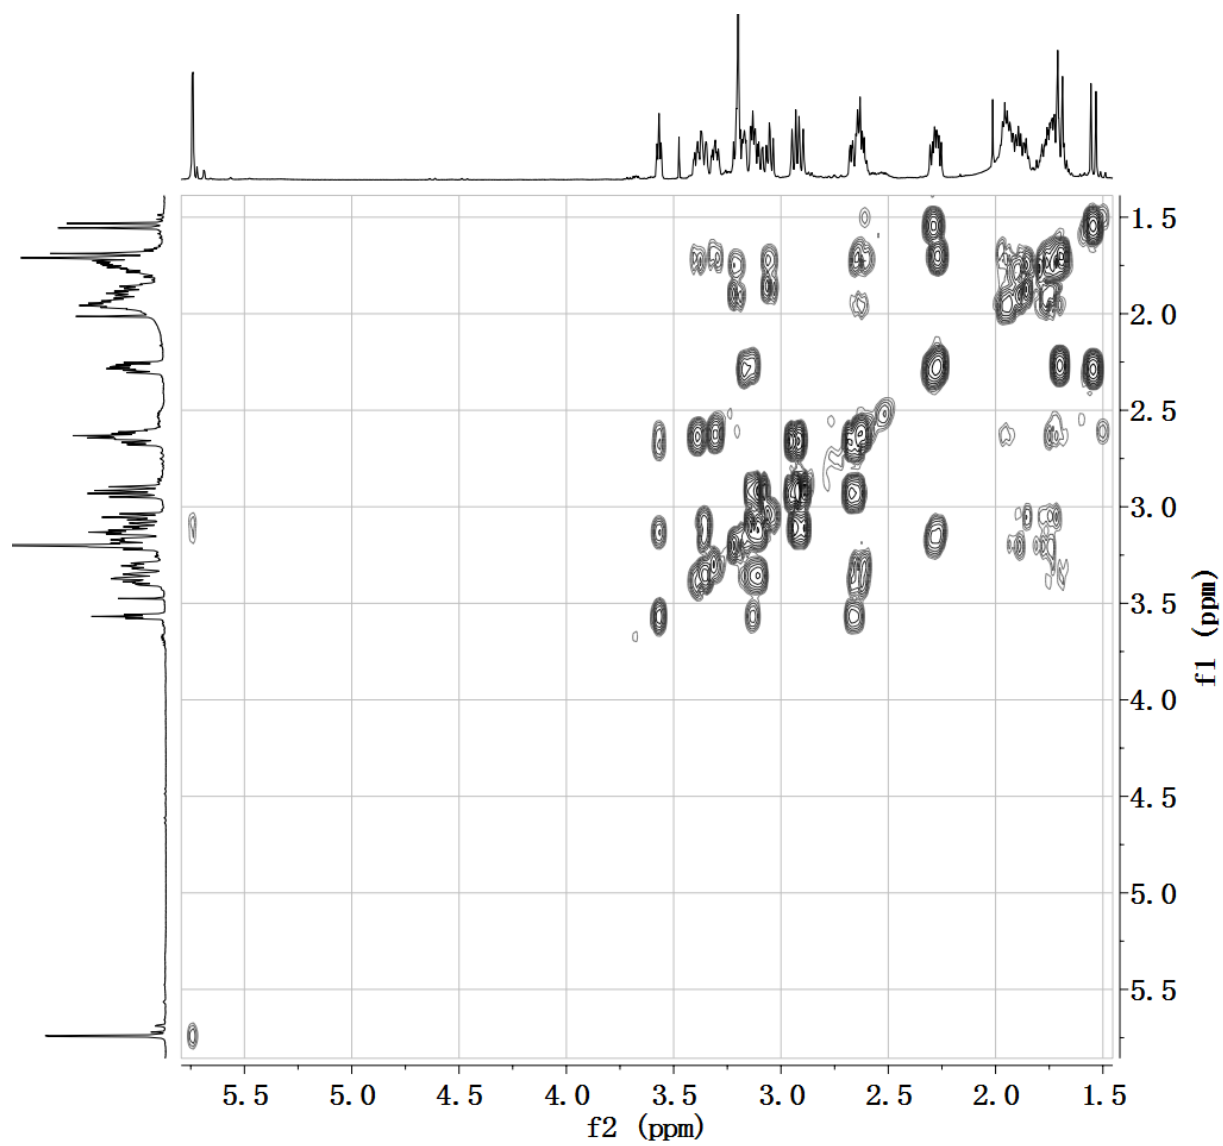

Figure S40. HSQC spectrum for flueggenine I (5) CDCl<sub>3</sub>.

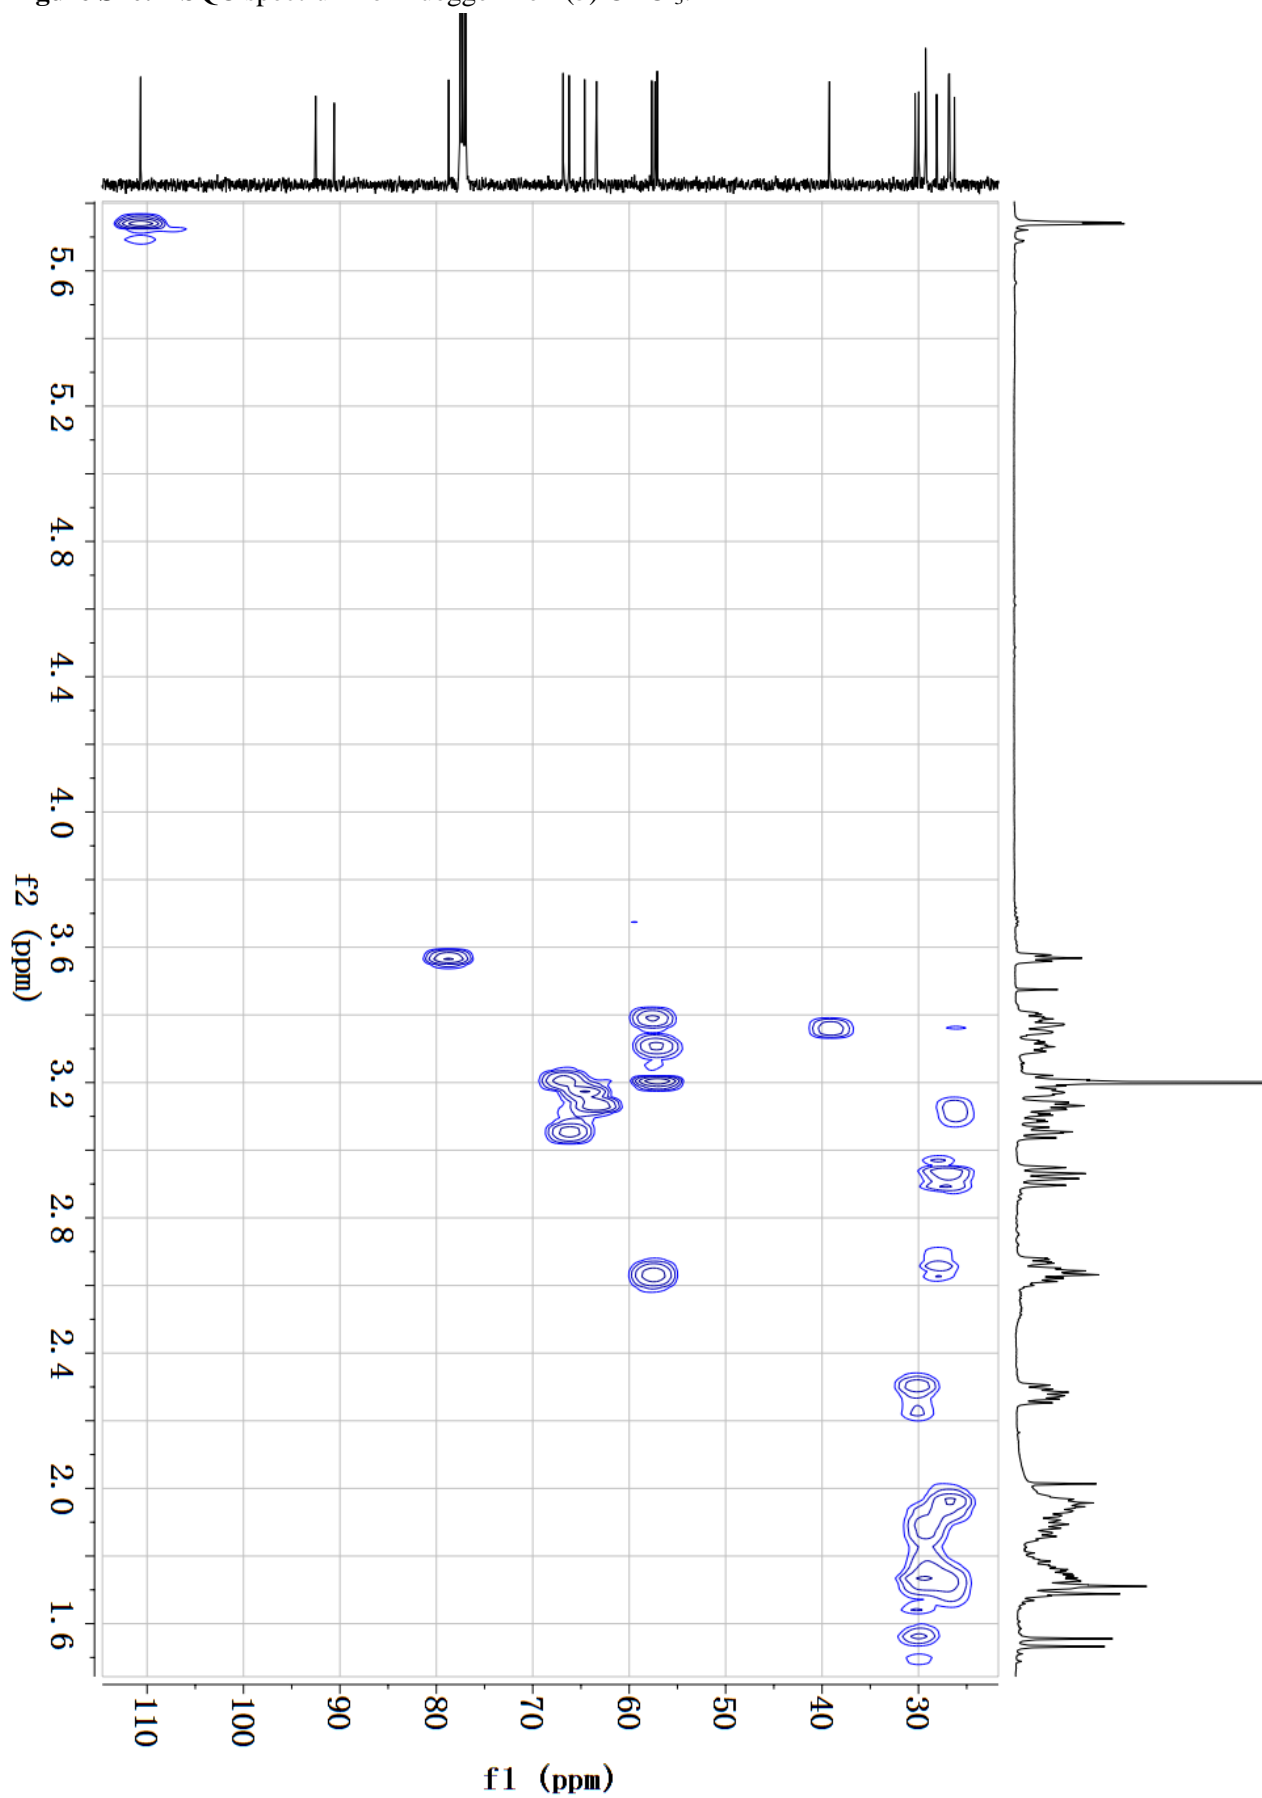

Figure S41. HMBC spectrum for flueggeine I (5) in CDCl<sub>3</sub>.

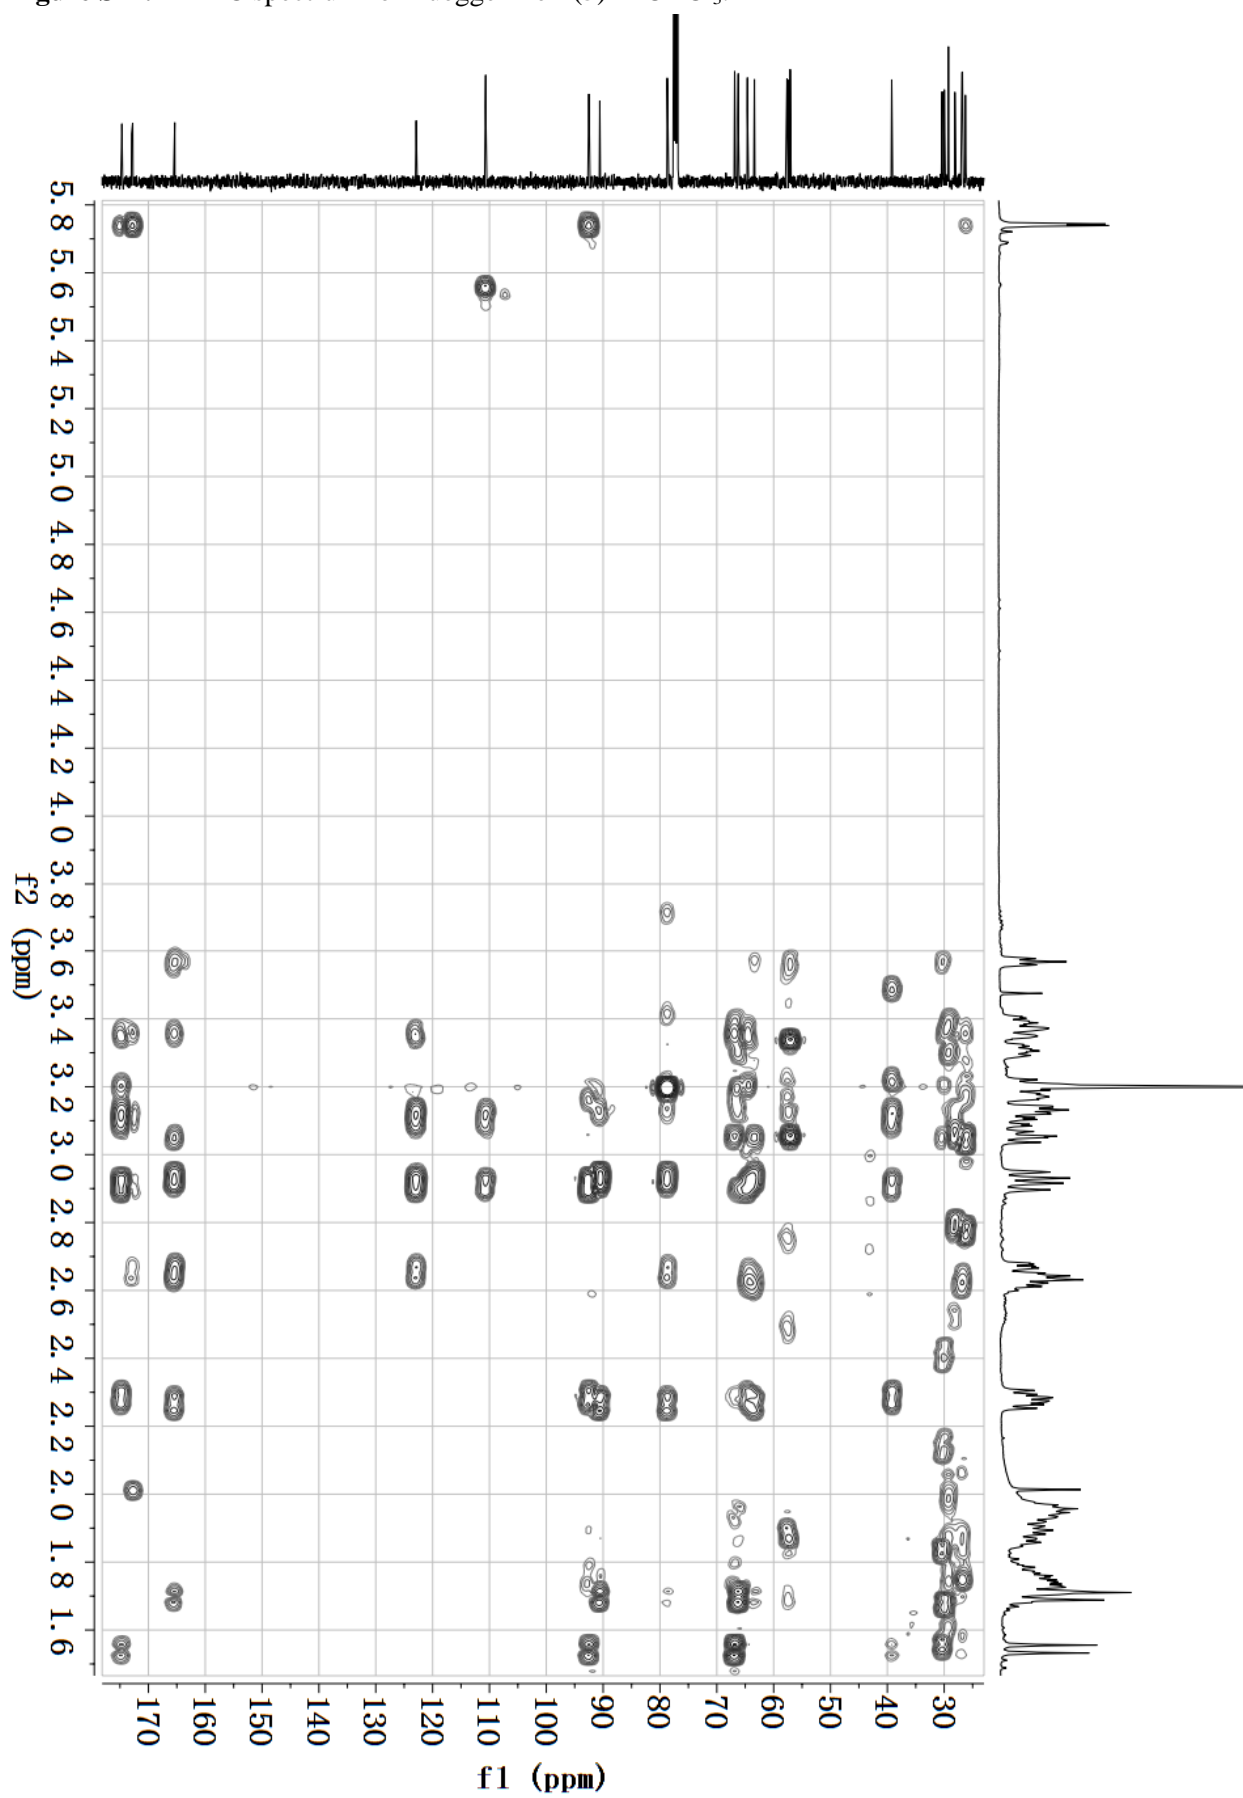

Figure S42. ROESY spectrum for flueggeine I (5) in CDCl<sub>3</sub>.

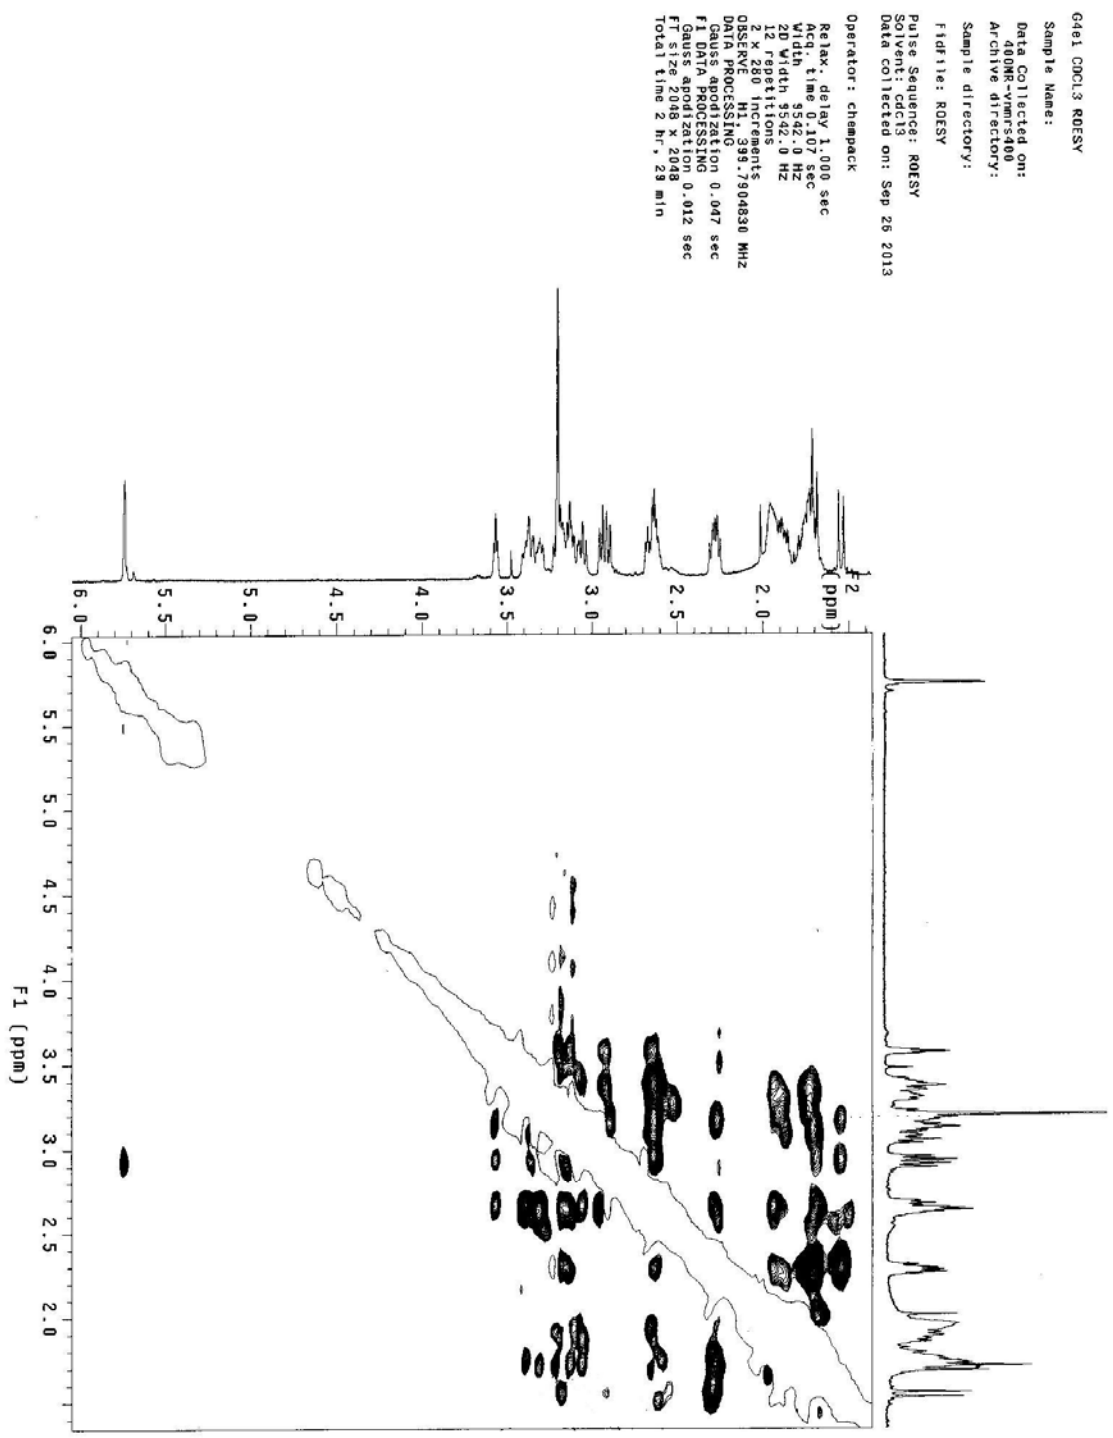

Figure S43. IR spectrum for flueggenine I (5).

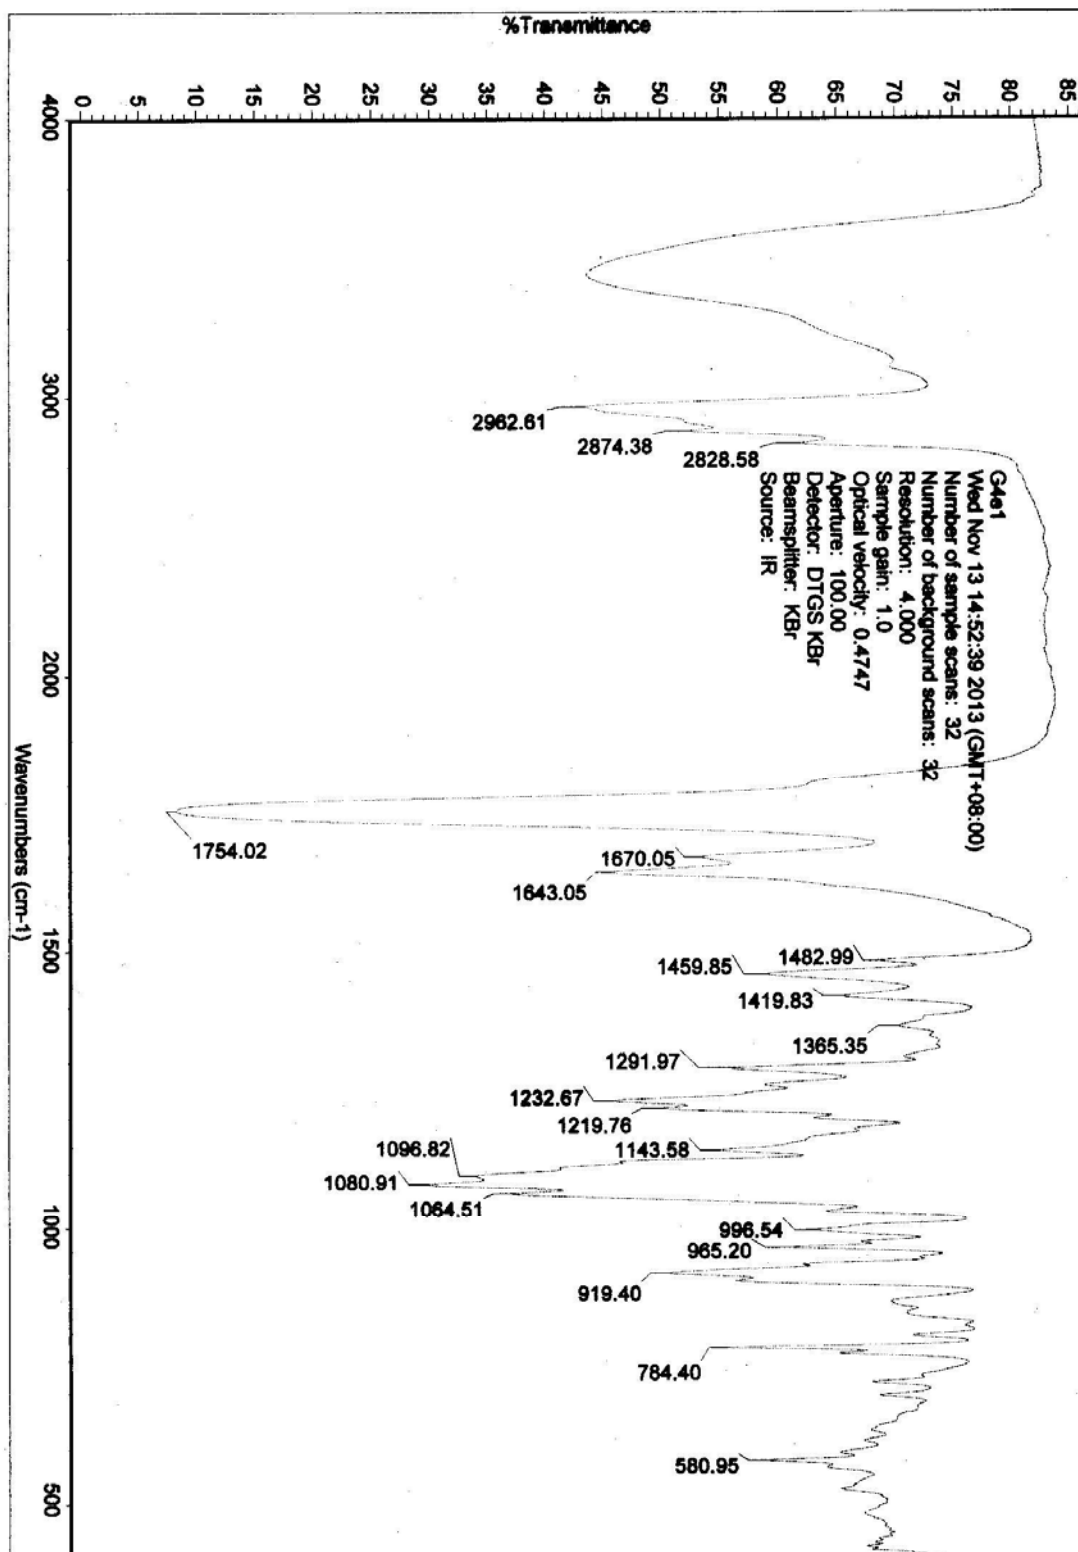

Figure S44. (+)-ESIMS spectrum for flueggeinone I (5).

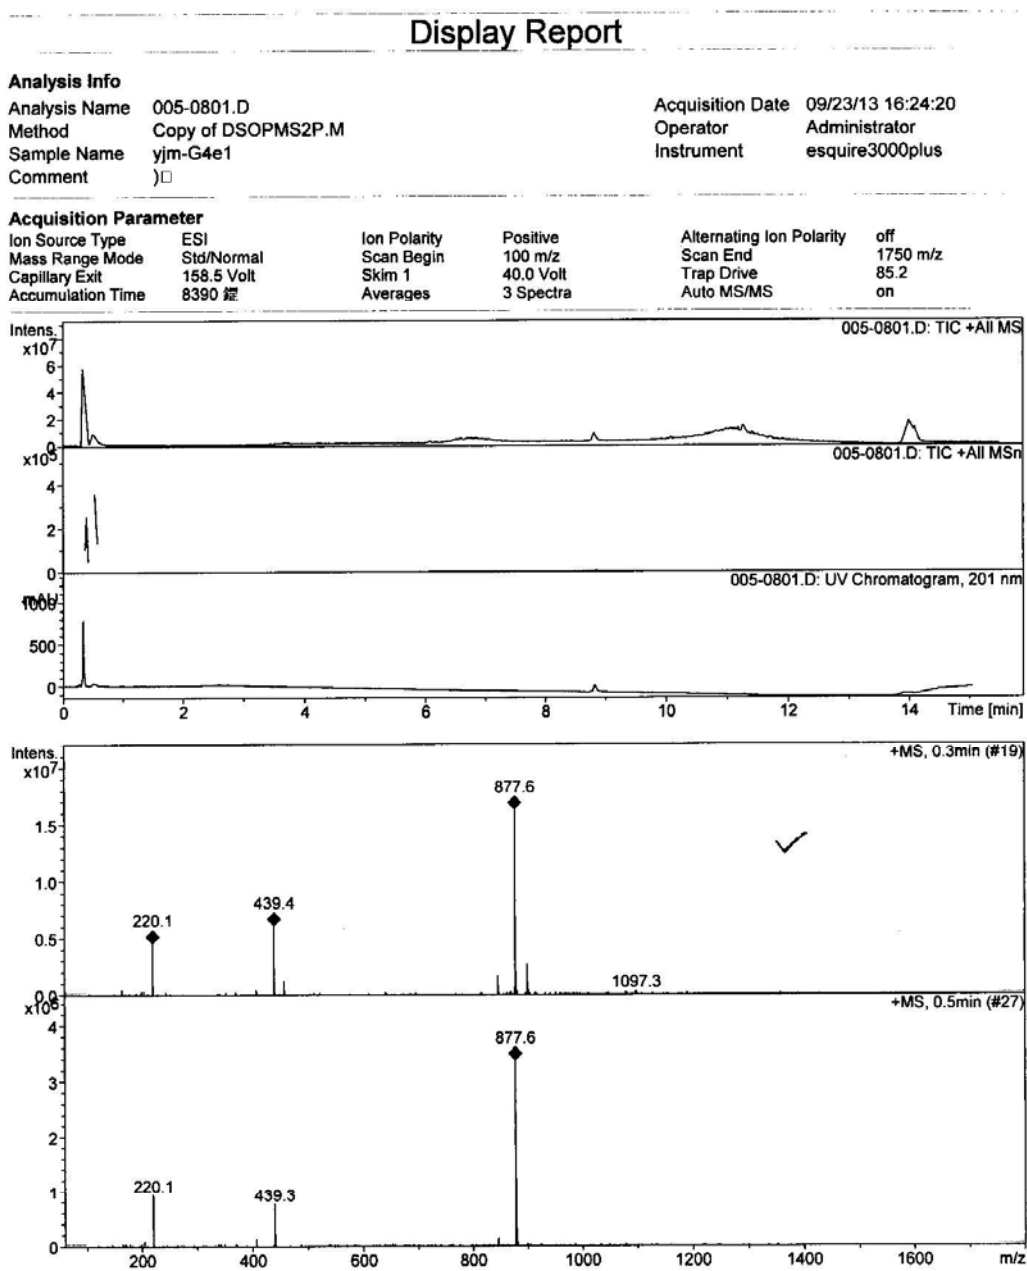

Figure S45. (+)-HRESIMS spectrum for flueggeine I (5).

Elemental Composition Report

Single Mass Analysis

Tolerance = 5.0 PPM / DBE: min = -1.5, max = 50.0

Element prediction: Off

Number of isotope peaks used for i-FIT = 3

Monoisotopic Mass, Even Electron Ions

403 formula(e) evaluated with 1 results within limits (up to 50 closest results for each mass)

Elements Used:

C: 5-80 H: 2-120 N: 0-4 O: 0-20

G4ge1

LCT PXE KE324

27-Sep-2013

10:22:18

1: TOF MS ES+

9.81e+003

G4e1\_0927 27 (0.583) AM2 (Ar,10000.0,0.00,1.00); ABS; Cm (11:27)

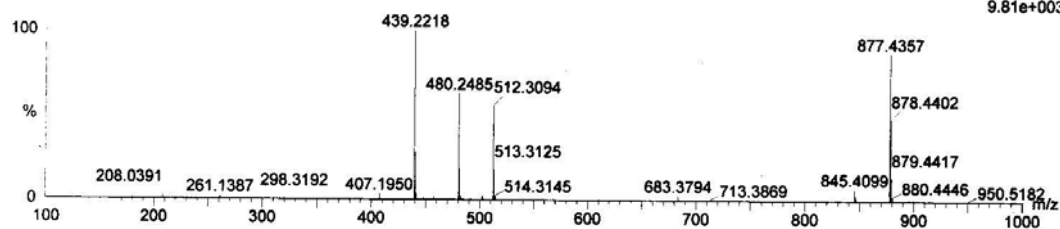

Minimum: -1.5  
Maximum: 3.0 5.0 50.0

| Mass     | Calc. Mass | mDa  | PPM  | DBE  | i-FIT | i-FIT (Norm) | Formula       |
|----------|------------|------|------|------|-------|--------------|---------------|
| 439.2218 | 439.2233   | -1.5 | -3.4 | 11.5 | 81.6  | 0.0          | C25 H31 N2 O5 |



Figure S46.  $^1\text{H}$  NMR spectrum for flueviroisine E (**6**) in  $\text{CDCl}_3$ .

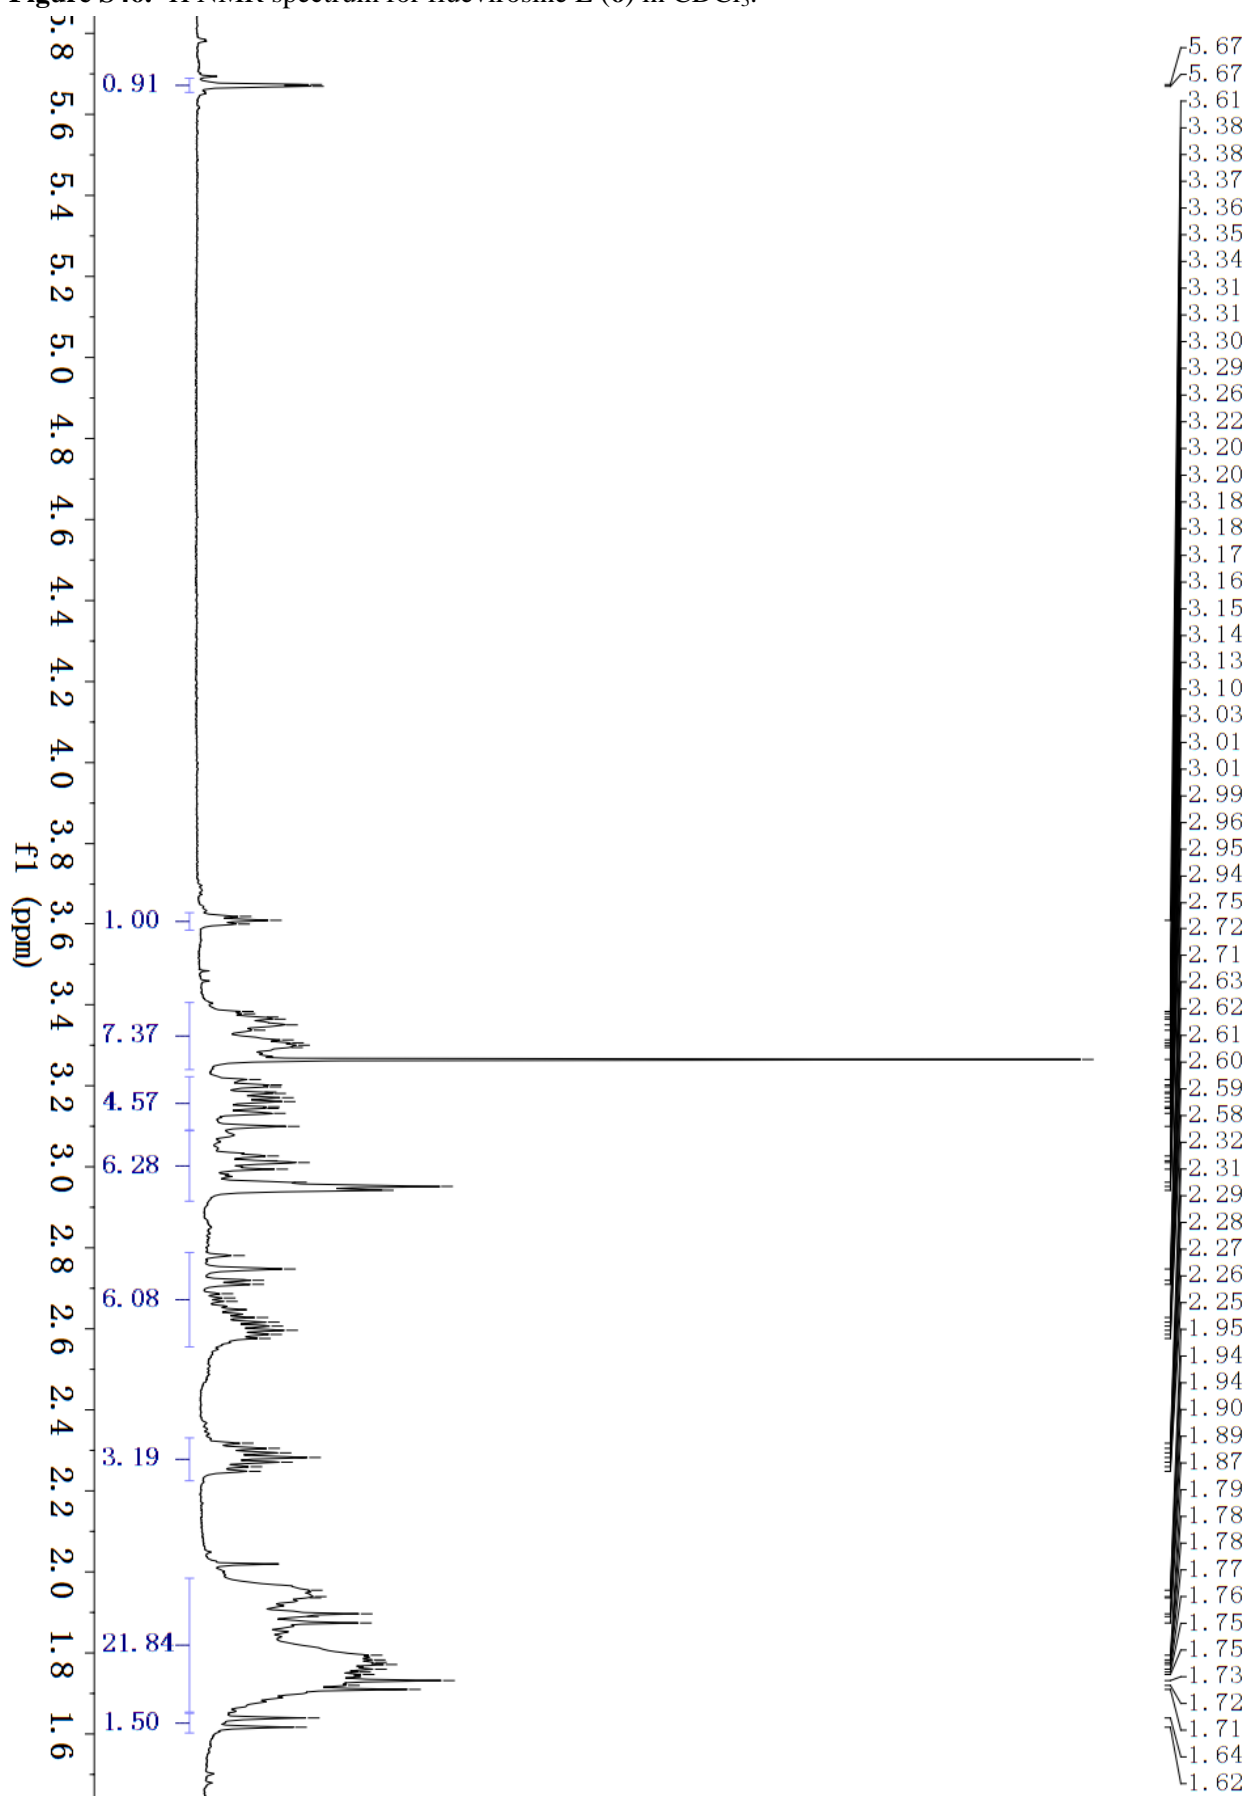

Figure S47.  $^{13}\text{C}$  NMR spectrum for flueggein E (**6**) in  $\text{CDCl}_3$ .

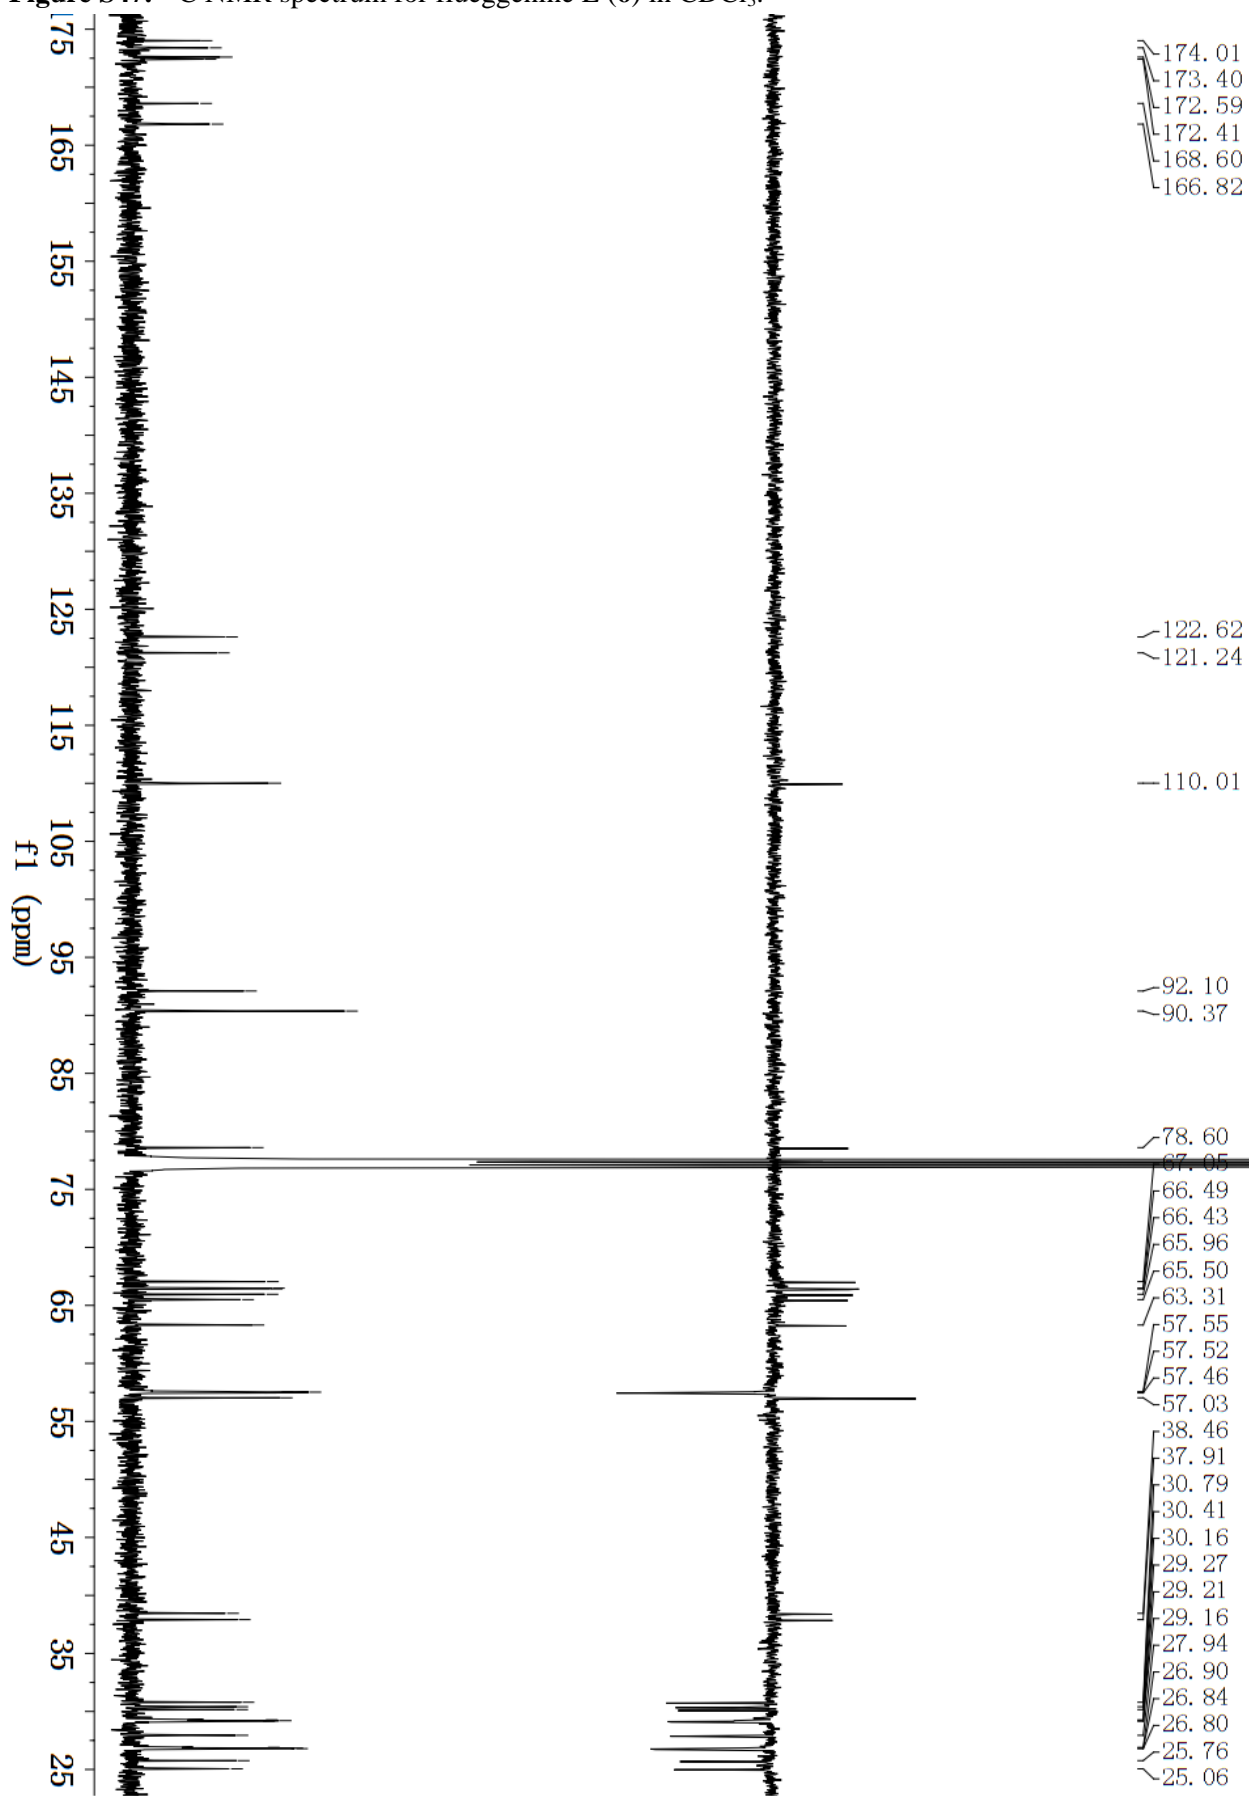

Figure S48.  $^1\text{H}$ - $^1\text{H}$  COSY spectrum for flueggeine E (**6**) in  $\text{CDCl}_3$ .

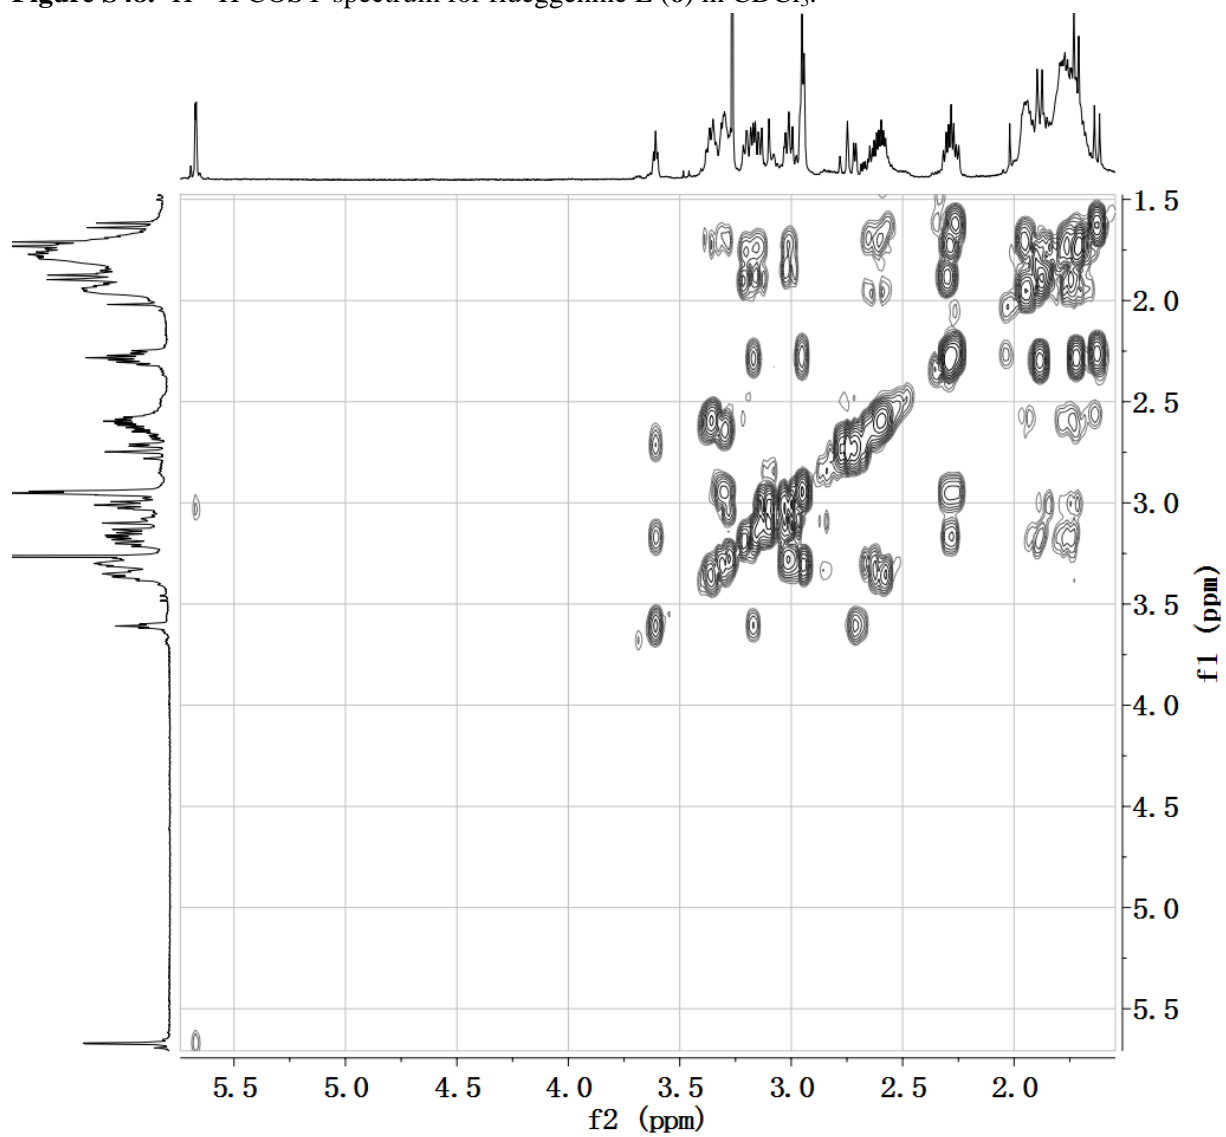

Figure S49. HSQC spectrum for flueggenine E (6) CDCl<sub>3</sub>.

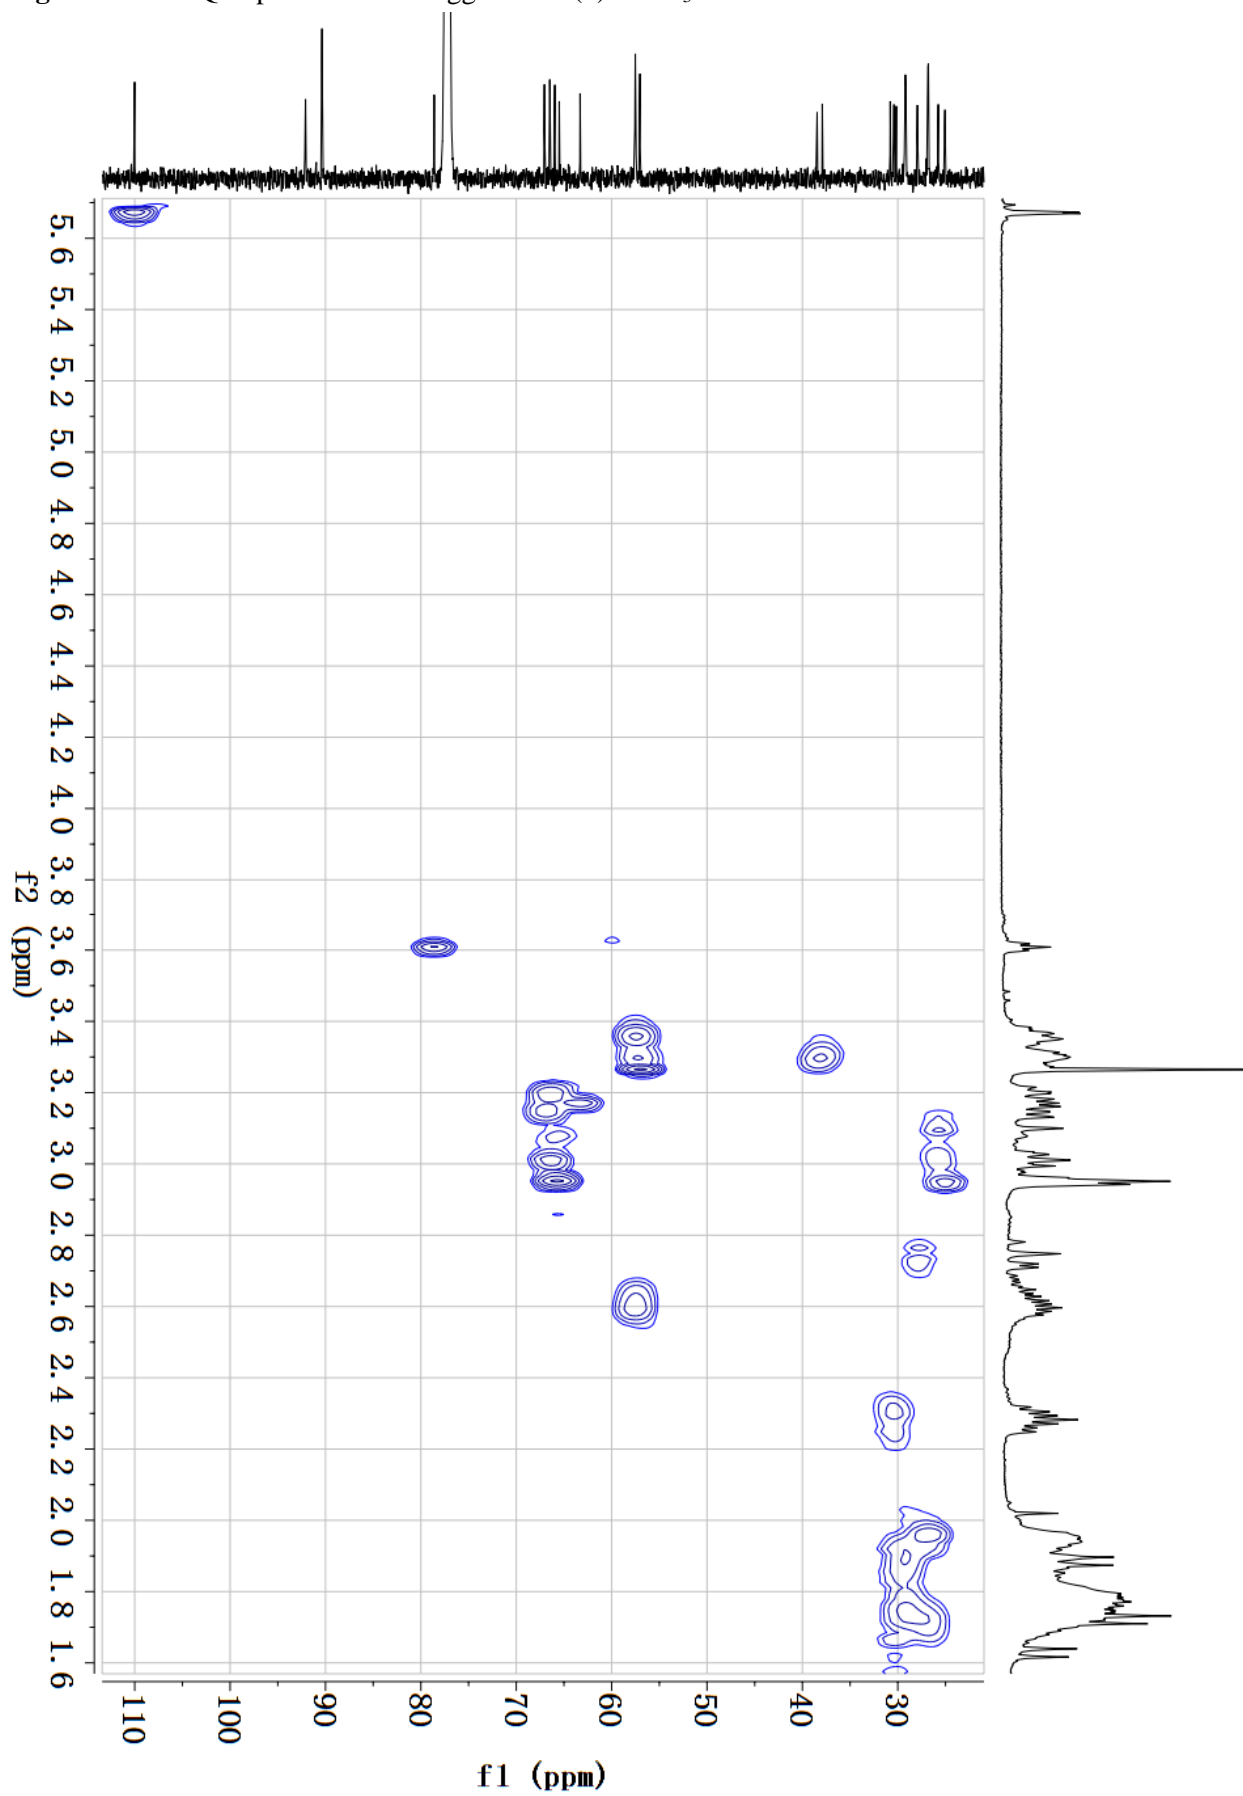

Figure S50. HMBC spectrum for flueggeine E (**6**) in CDCl<sub>3</sub>.

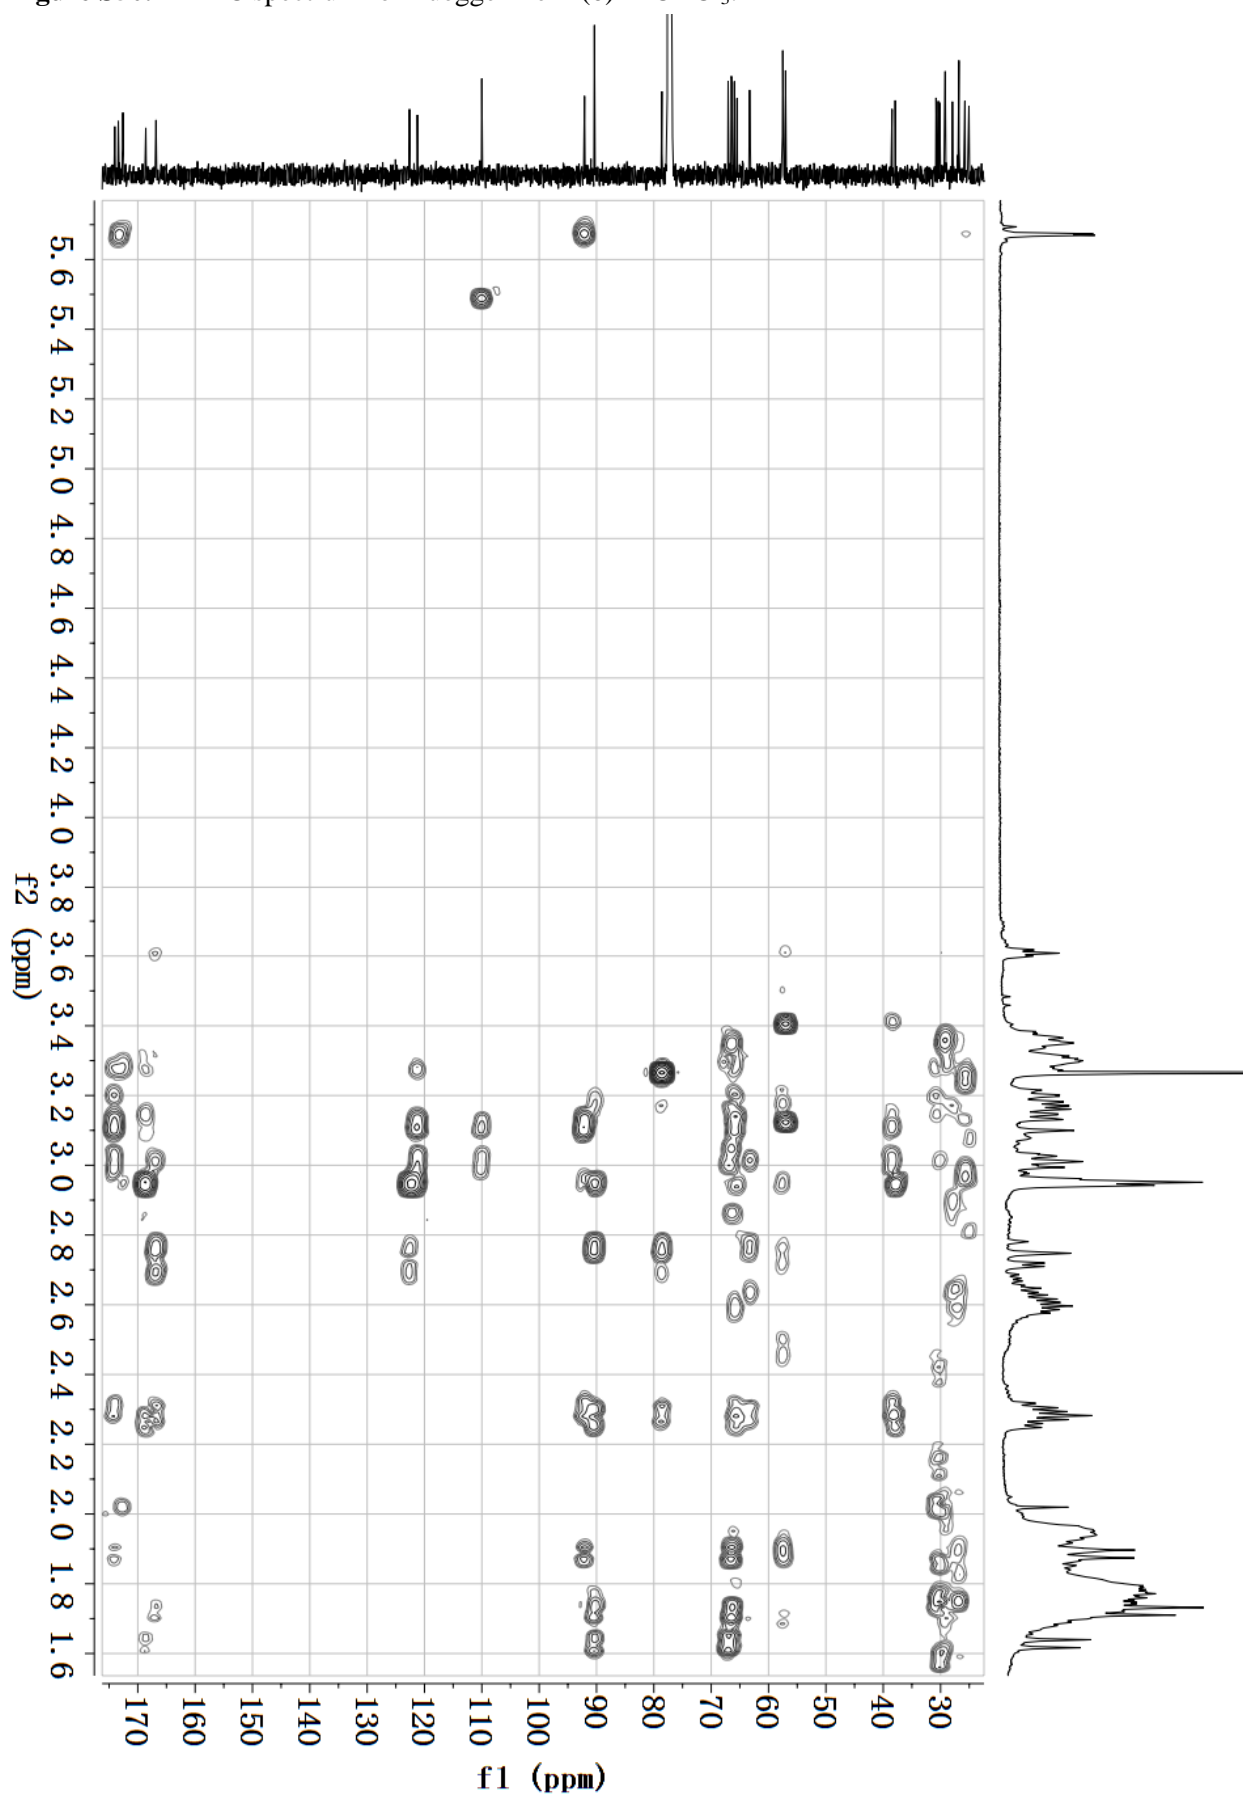

Figure S51. ROESY spectrum for flueggeine E (6) in CDCl<sub>3</sub>.

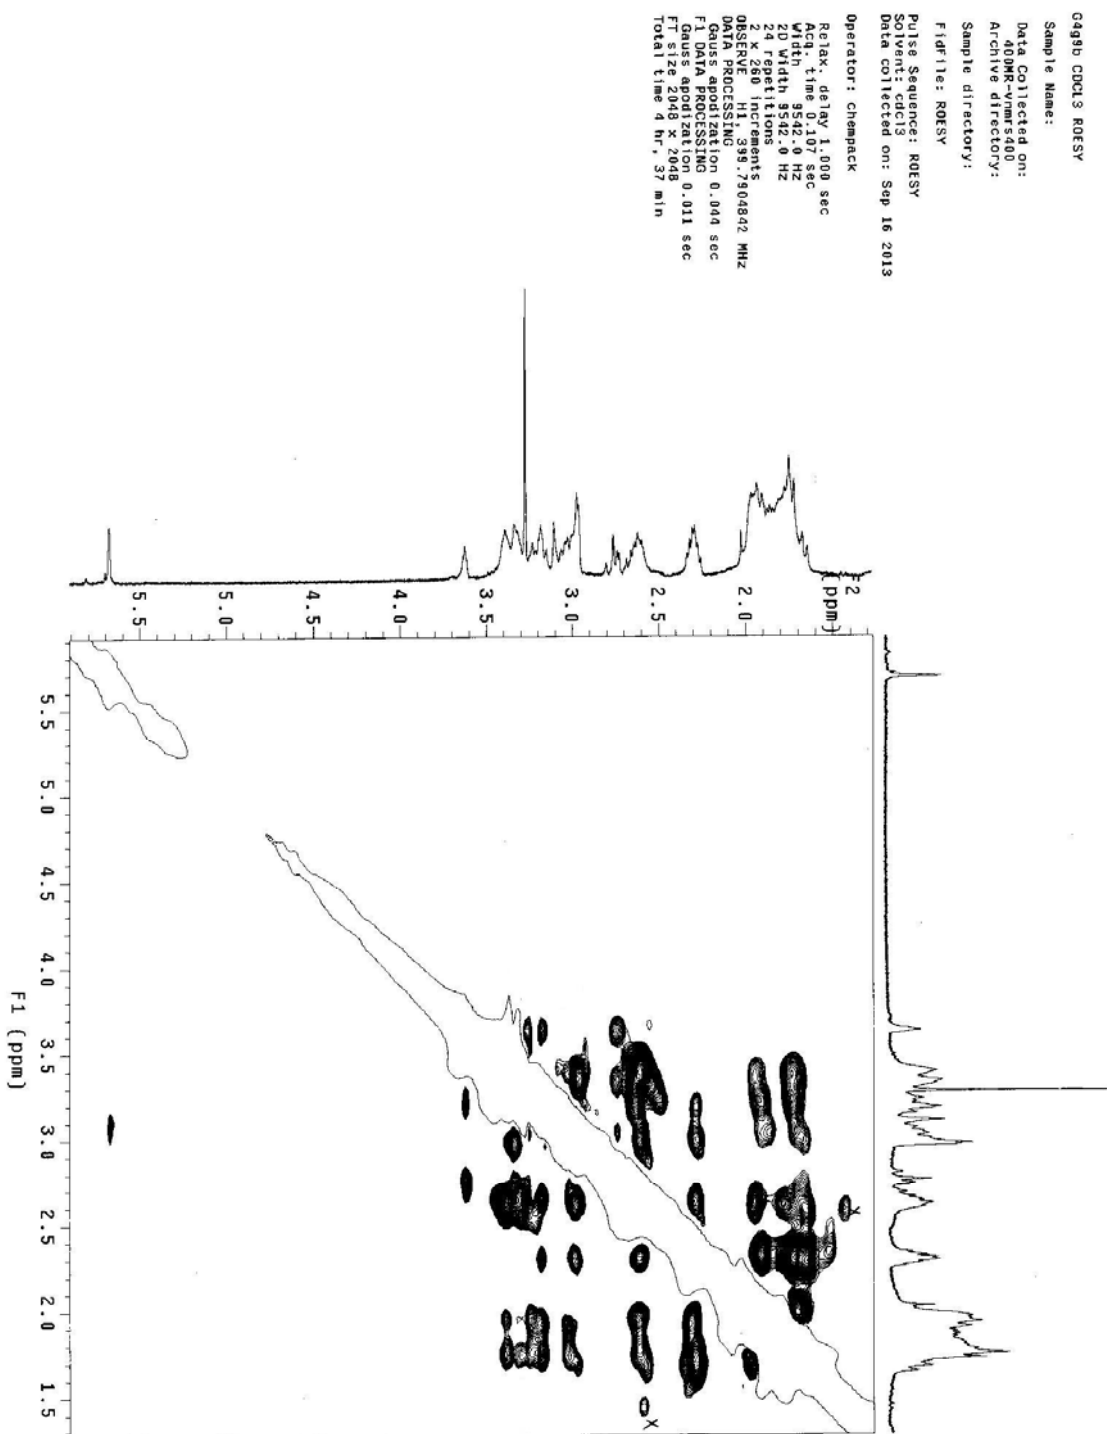

Figure S52. IR spectrum for flueggenine E (6).

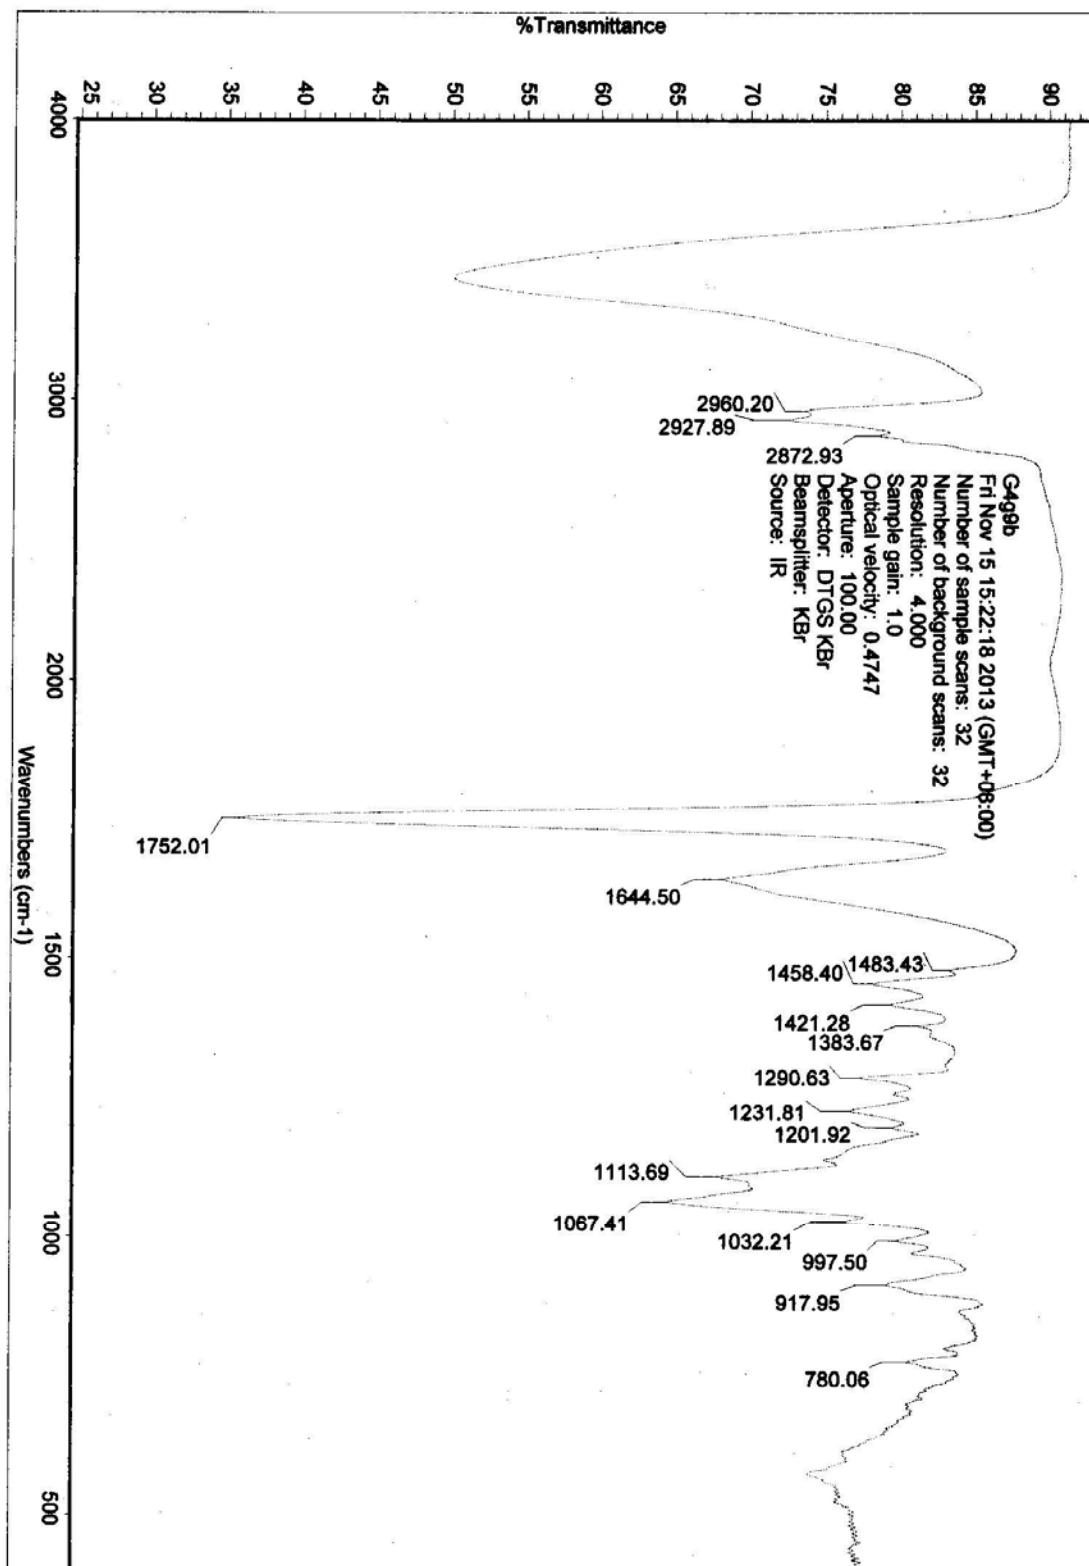

Figure S53. (+)-ESIMS spectrum for flueggeine E (6).

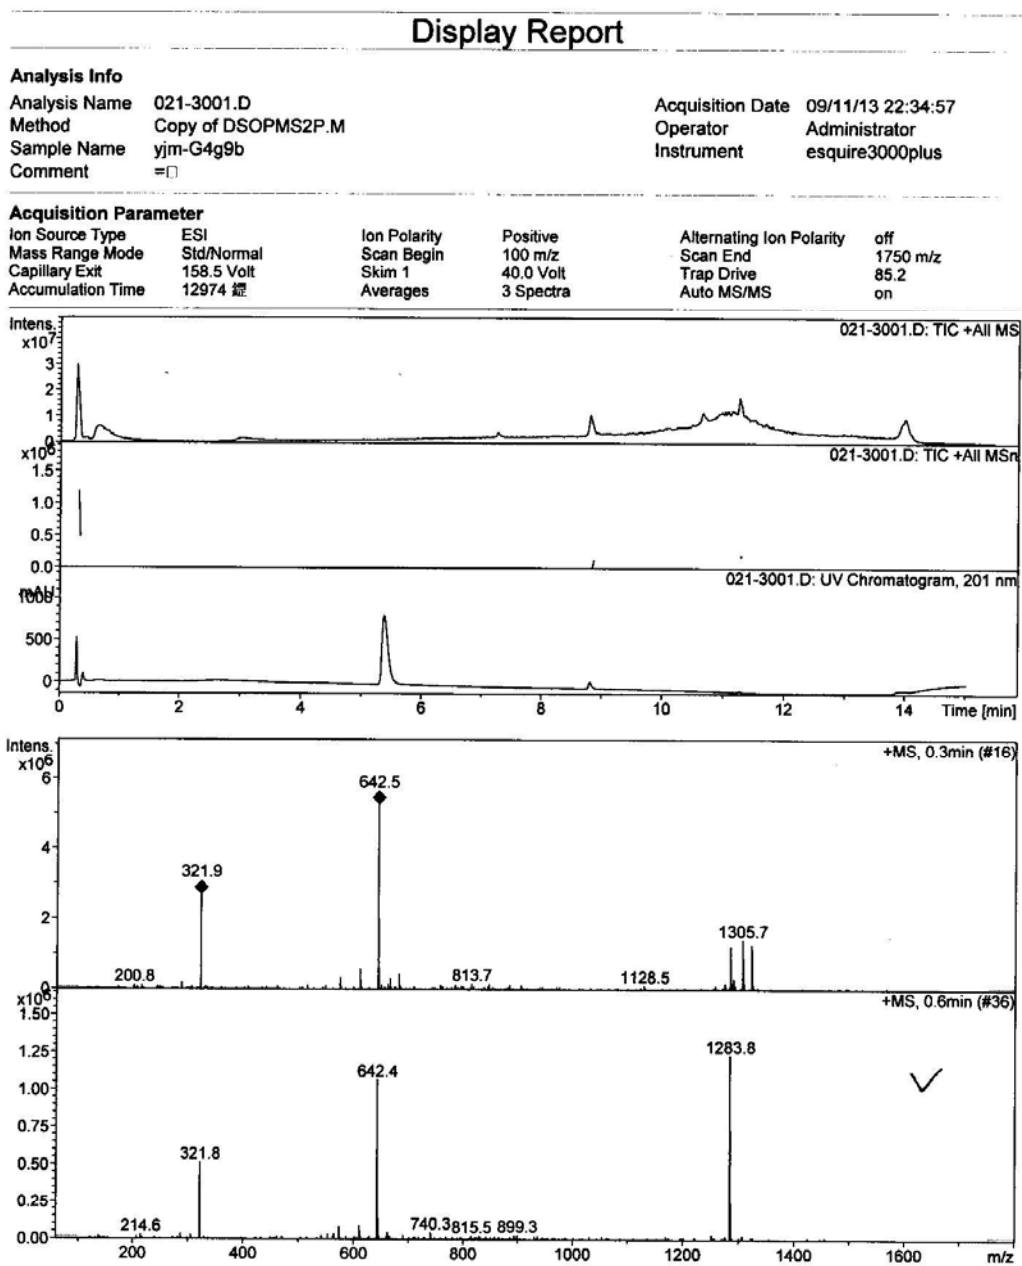



Figure S54. (+)-HRESIMS spectrum for flueggeine E (6).

Elemental Composition Report

Single Mass Analysis

Tolerance = 3.0 PPM / DBE: min = -1.5, max = 50.0

Element prediction: Off

Number of isotope peaks used for i-FIT = 3

Monoisotopic Mass, Even Electron Ions

793 formula(e) evaluated with 3 results within limits (up to 50 closest results for each mass)

Elements Used:

C: 5-80 H: 2-120 N: 0-5 O: 0-20

G4g9b

LCT PXE KE324

13-Sep-2013

15:18:05

G4g9b\_0913 27 (0.565) AM2 (Ar,10000.0,0.00,1.00); ABS; Cm (26.42)

1: TOF MS ES+

1.71e+004

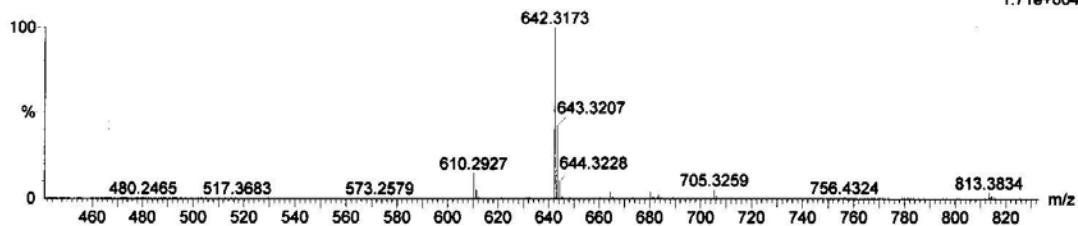

Minimum:

Maximum: 3.0 3.0 -1.5

50.0

| Mass     | Calc. Mass | mDa  | PPM  | DBE  | i-FIT | i-FIT (Norm) | Formula       |
|----------|------------|------|------|------|-------|--------------|---------------|
| 642.3173 | 642.3179   | -0.6 | -0.9 | 17.5 | 74.1  | 0.0          | C37 H44 N3 O7 |
|          | 642.3184   | -1.1 | -1.7 | -0.5 | 83.0  | 8.9          | C24 H52 N O18 |
|          | 642.3161   | 1.2  | 1.9  | 30.5 | 83.3  | 9.2          | C49 H40 N     |

Figure S55.  $^1\text{H}$  NMR spectrum for flueviroisine F (**7**) in  $\text{CDCl}_3$ .

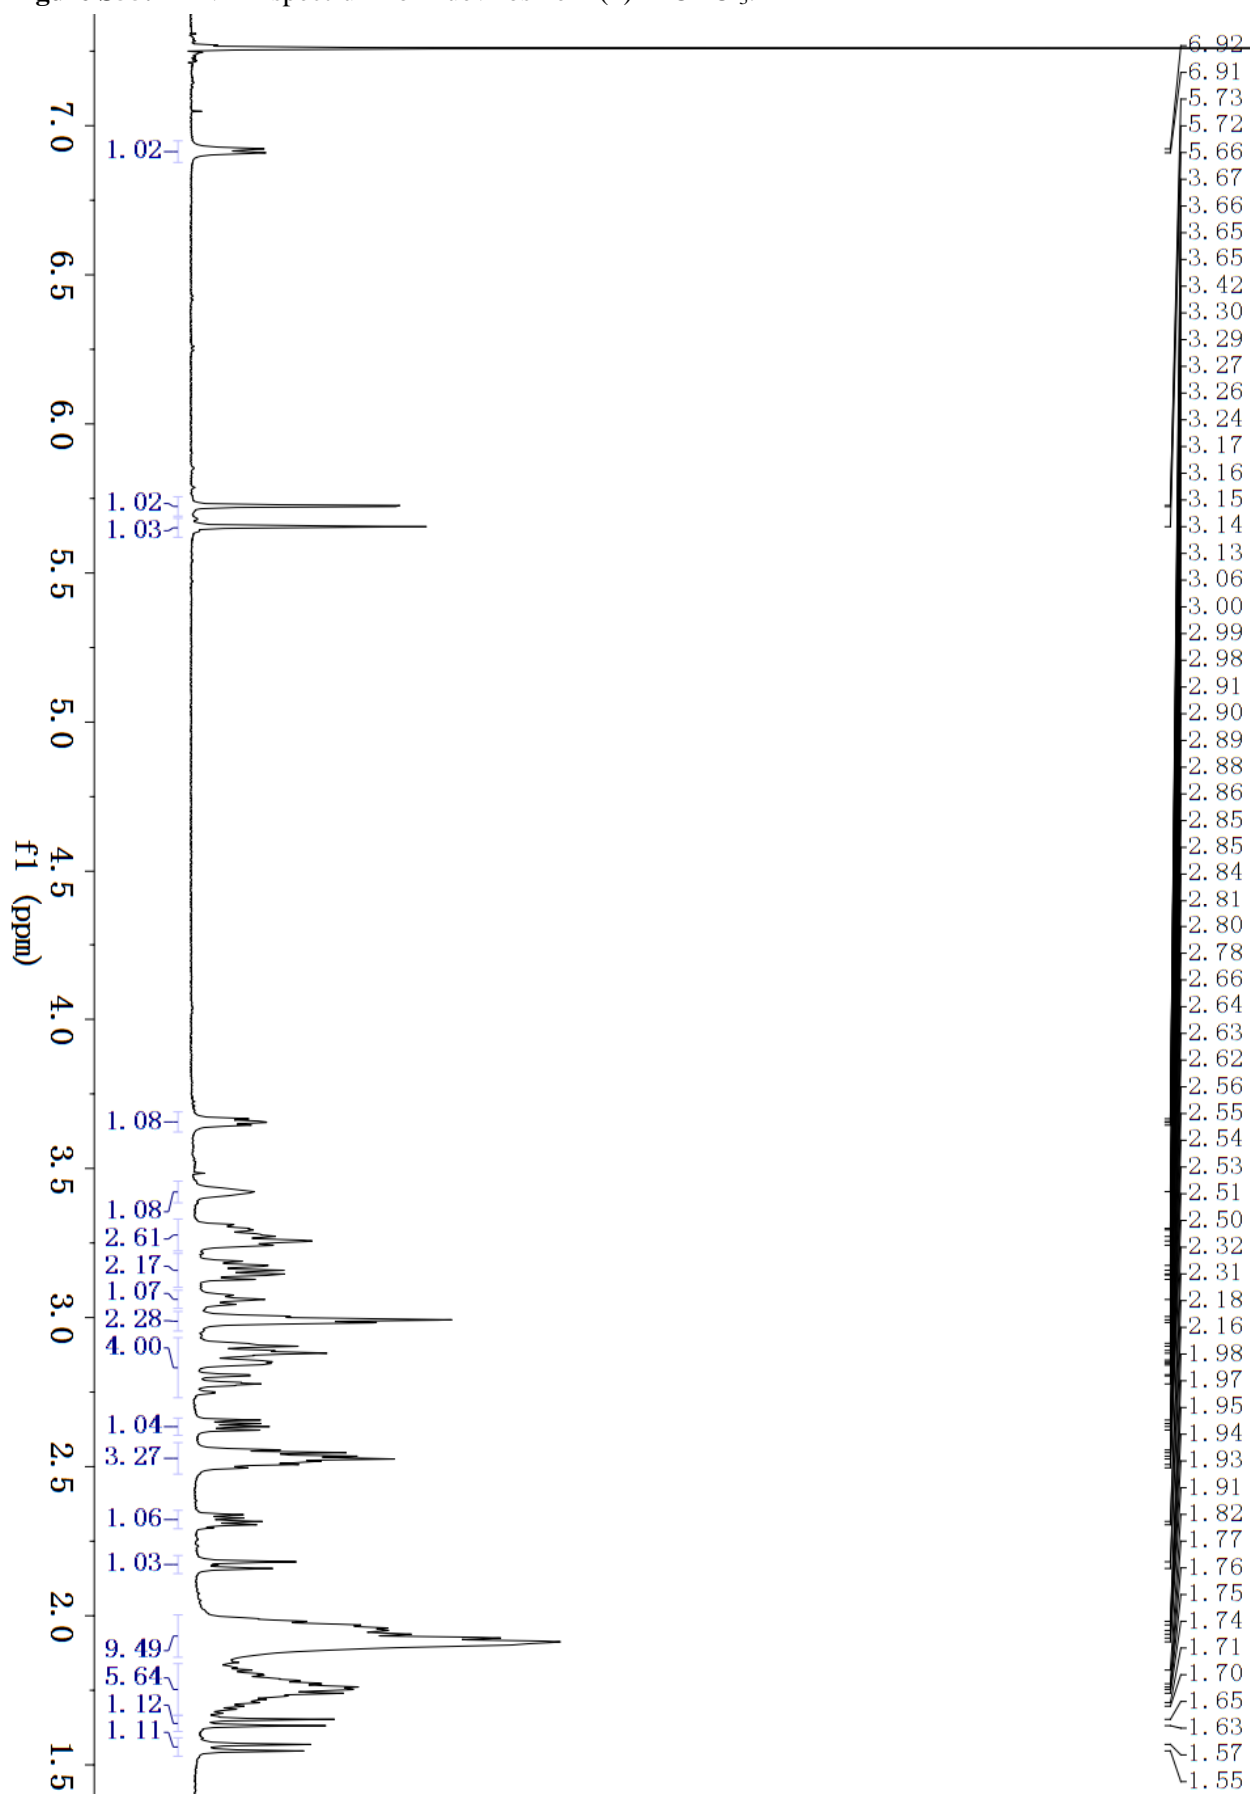

Figure S56.  $^{13}\text{C}$  NMR spectrum for flueggein F (7) in  $\text{CDCl}_3$ .

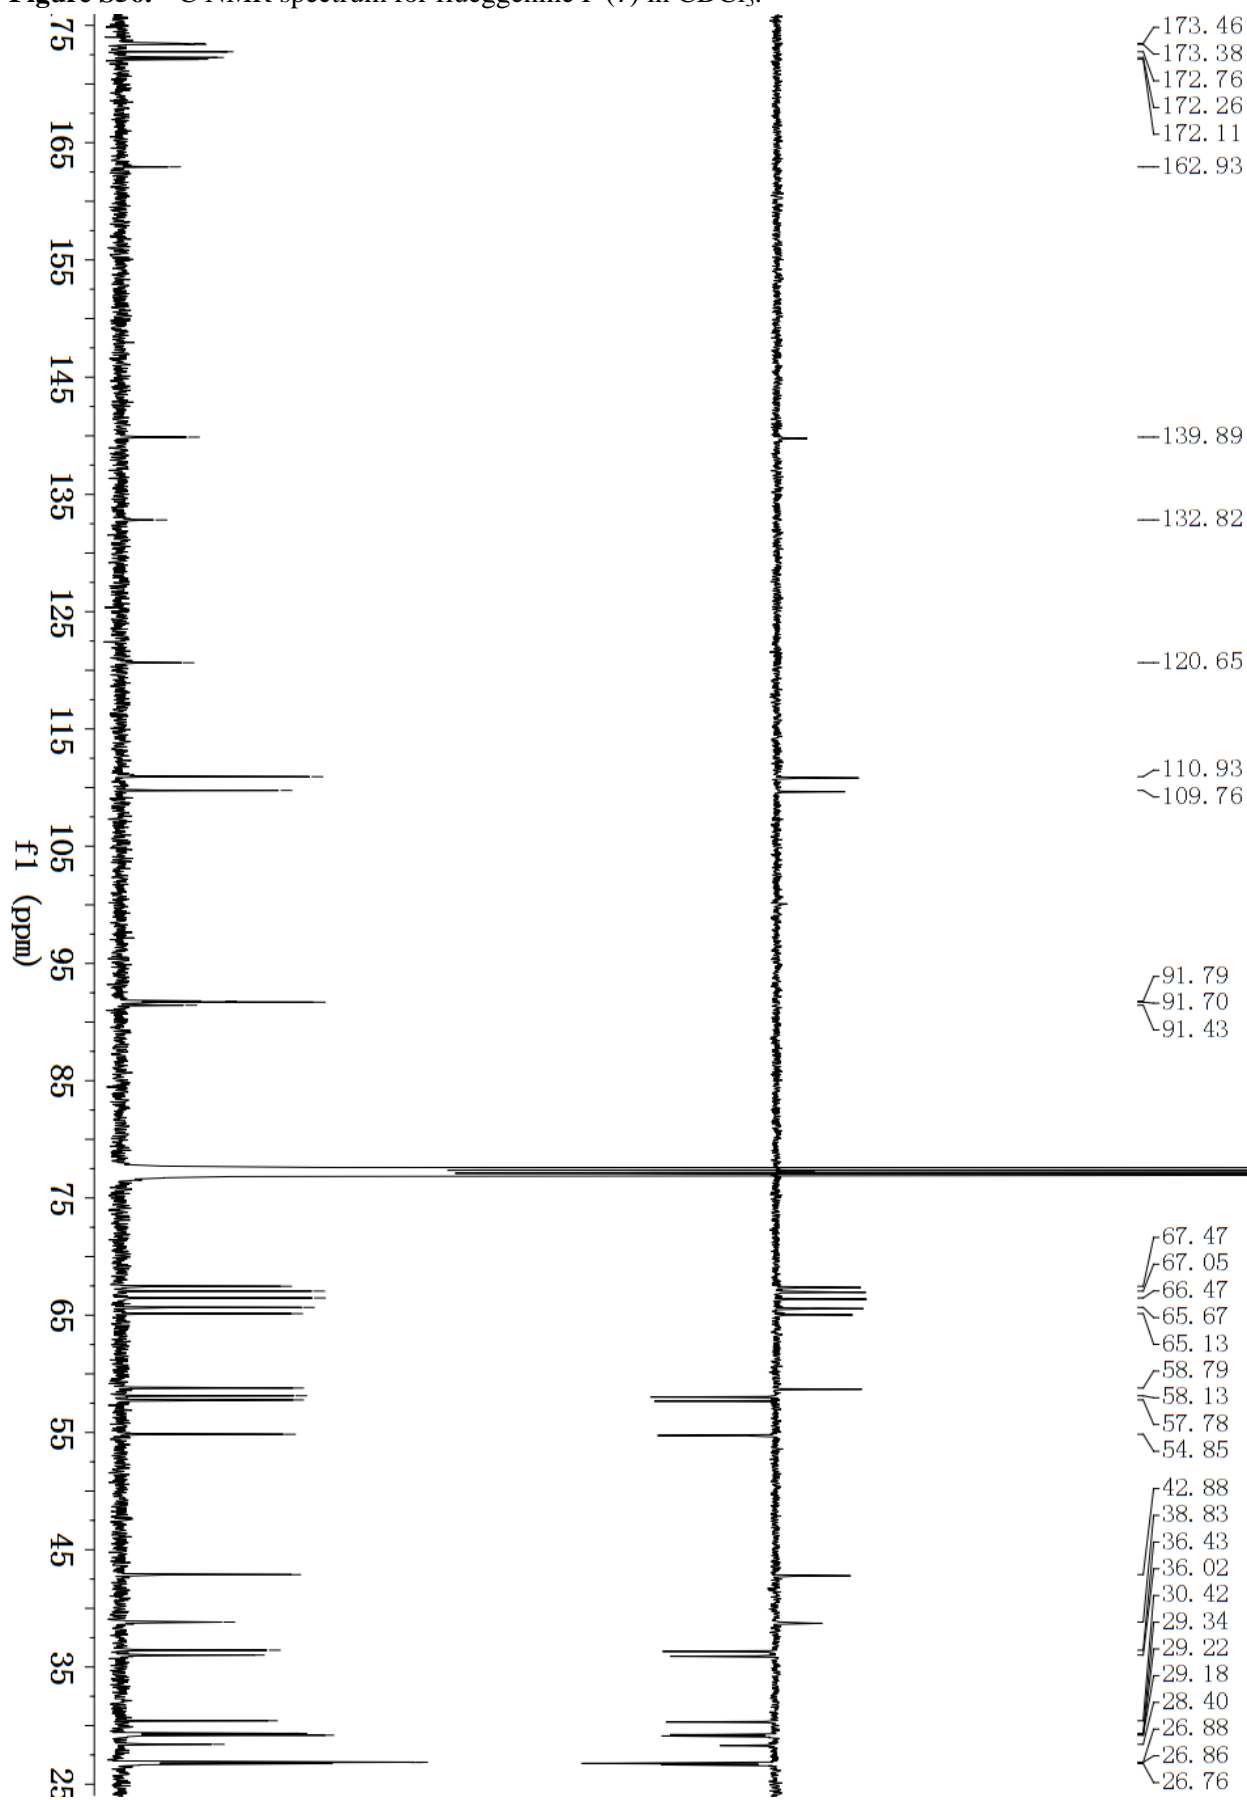

Figure S57.  $^1\text{H}$ - $^1\text{H}$  COSY spectrum for flueggeine F (7) in  $\text{CDCl}_3$ .

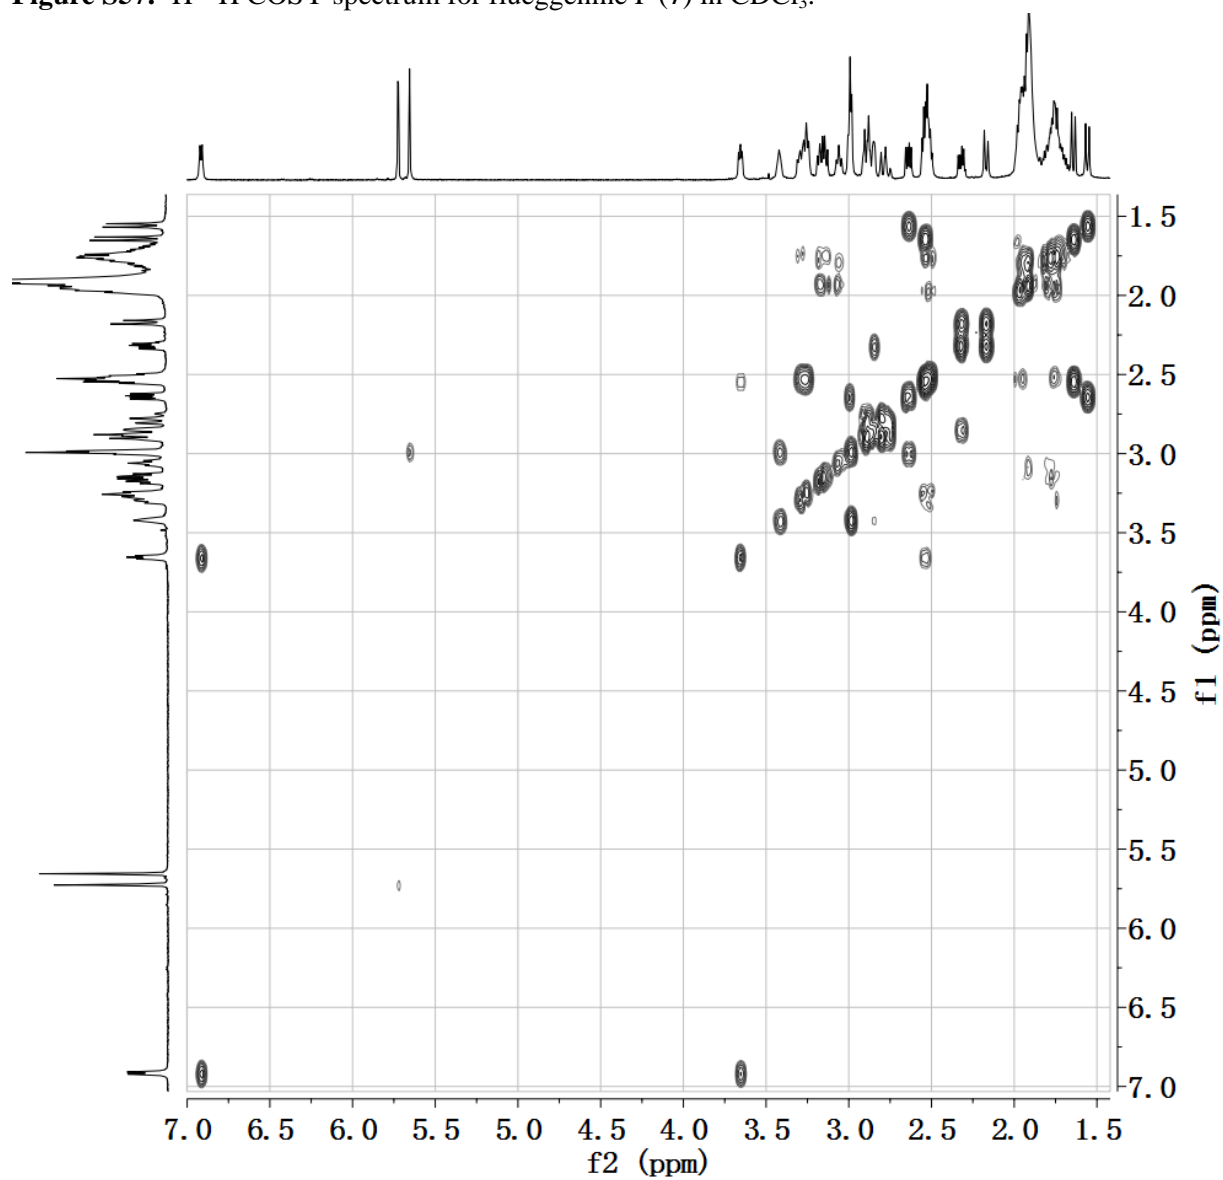

Figure S58. HSQC spectrum for flueggein F (7)  $\text{CDCl}_3$ .

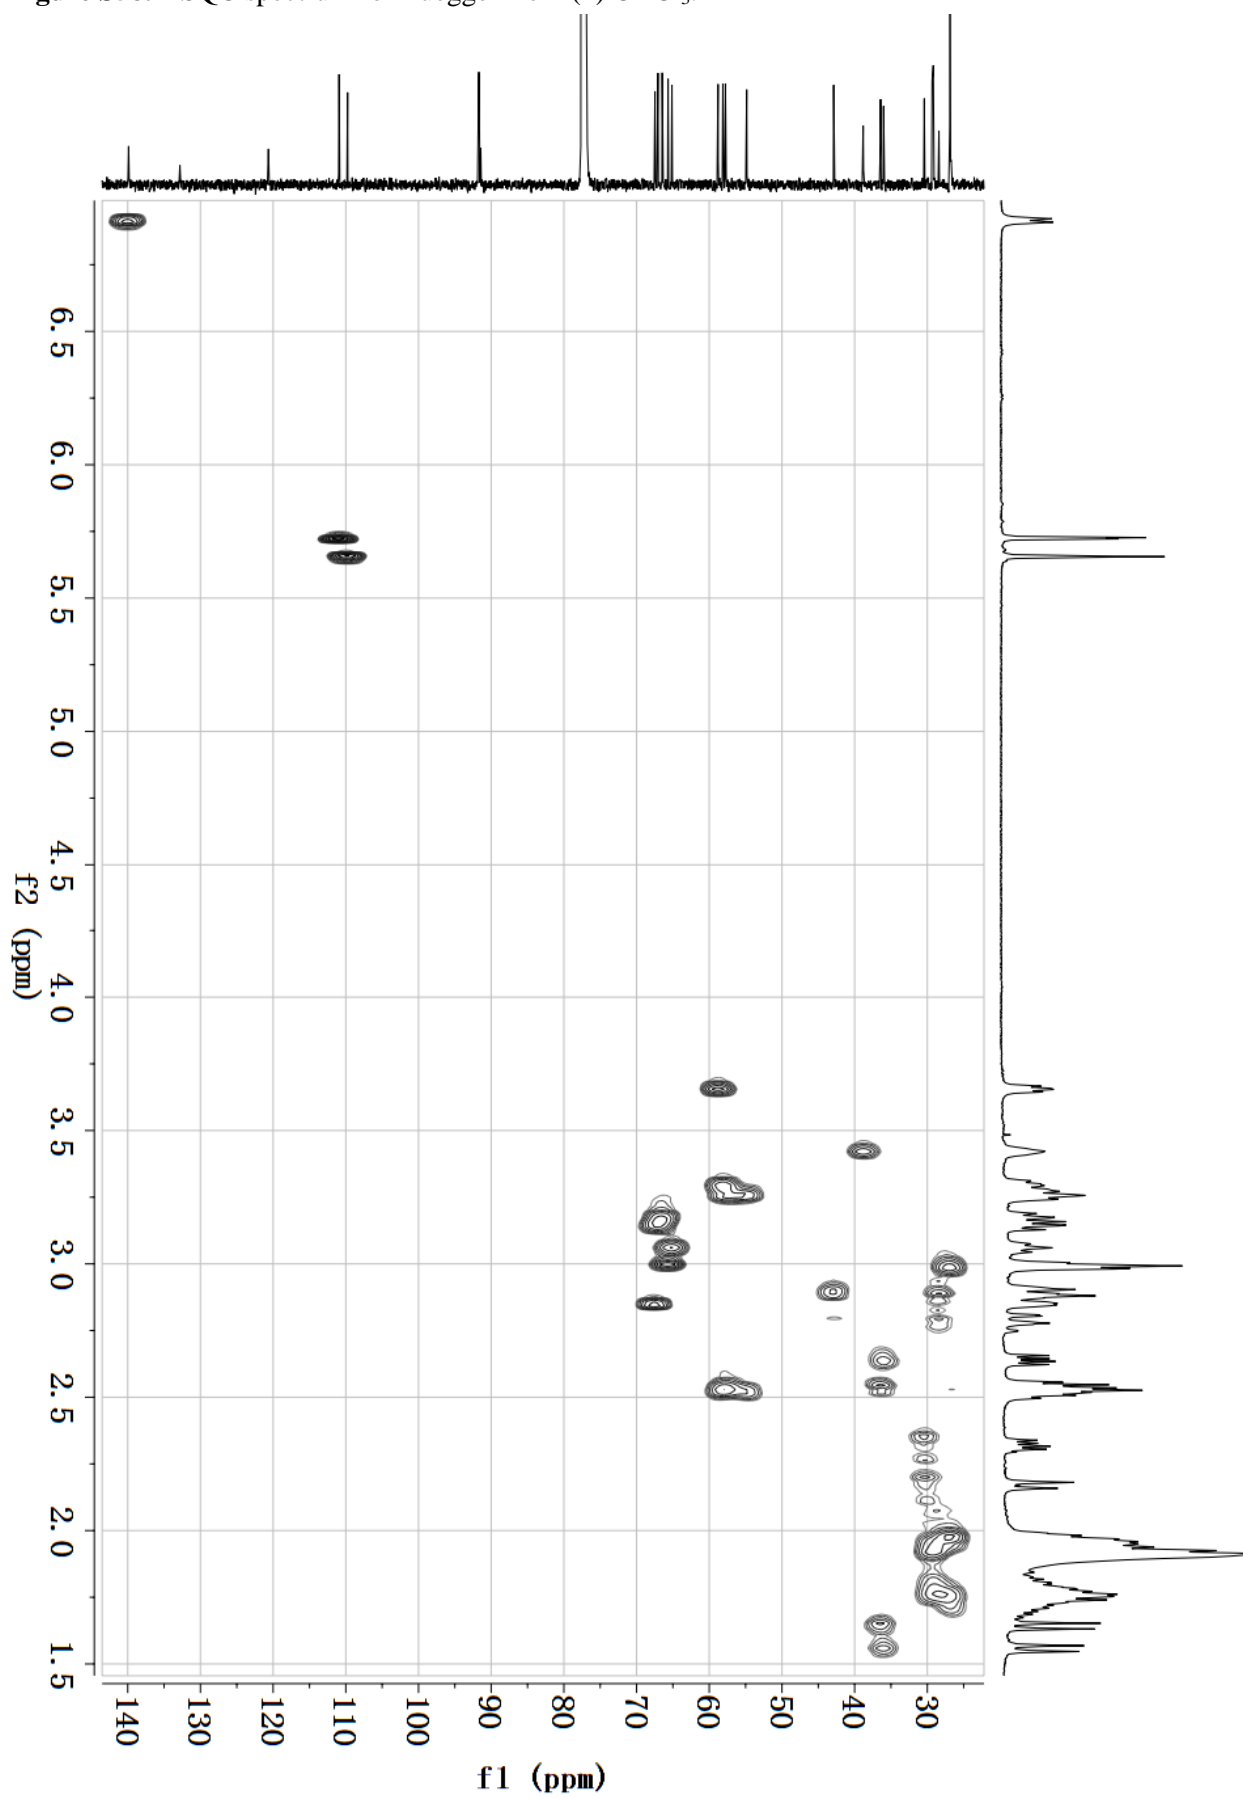

Figure S59. HMBC spectrum for flueggein F (7) in CDCl<sub>3</sub>.

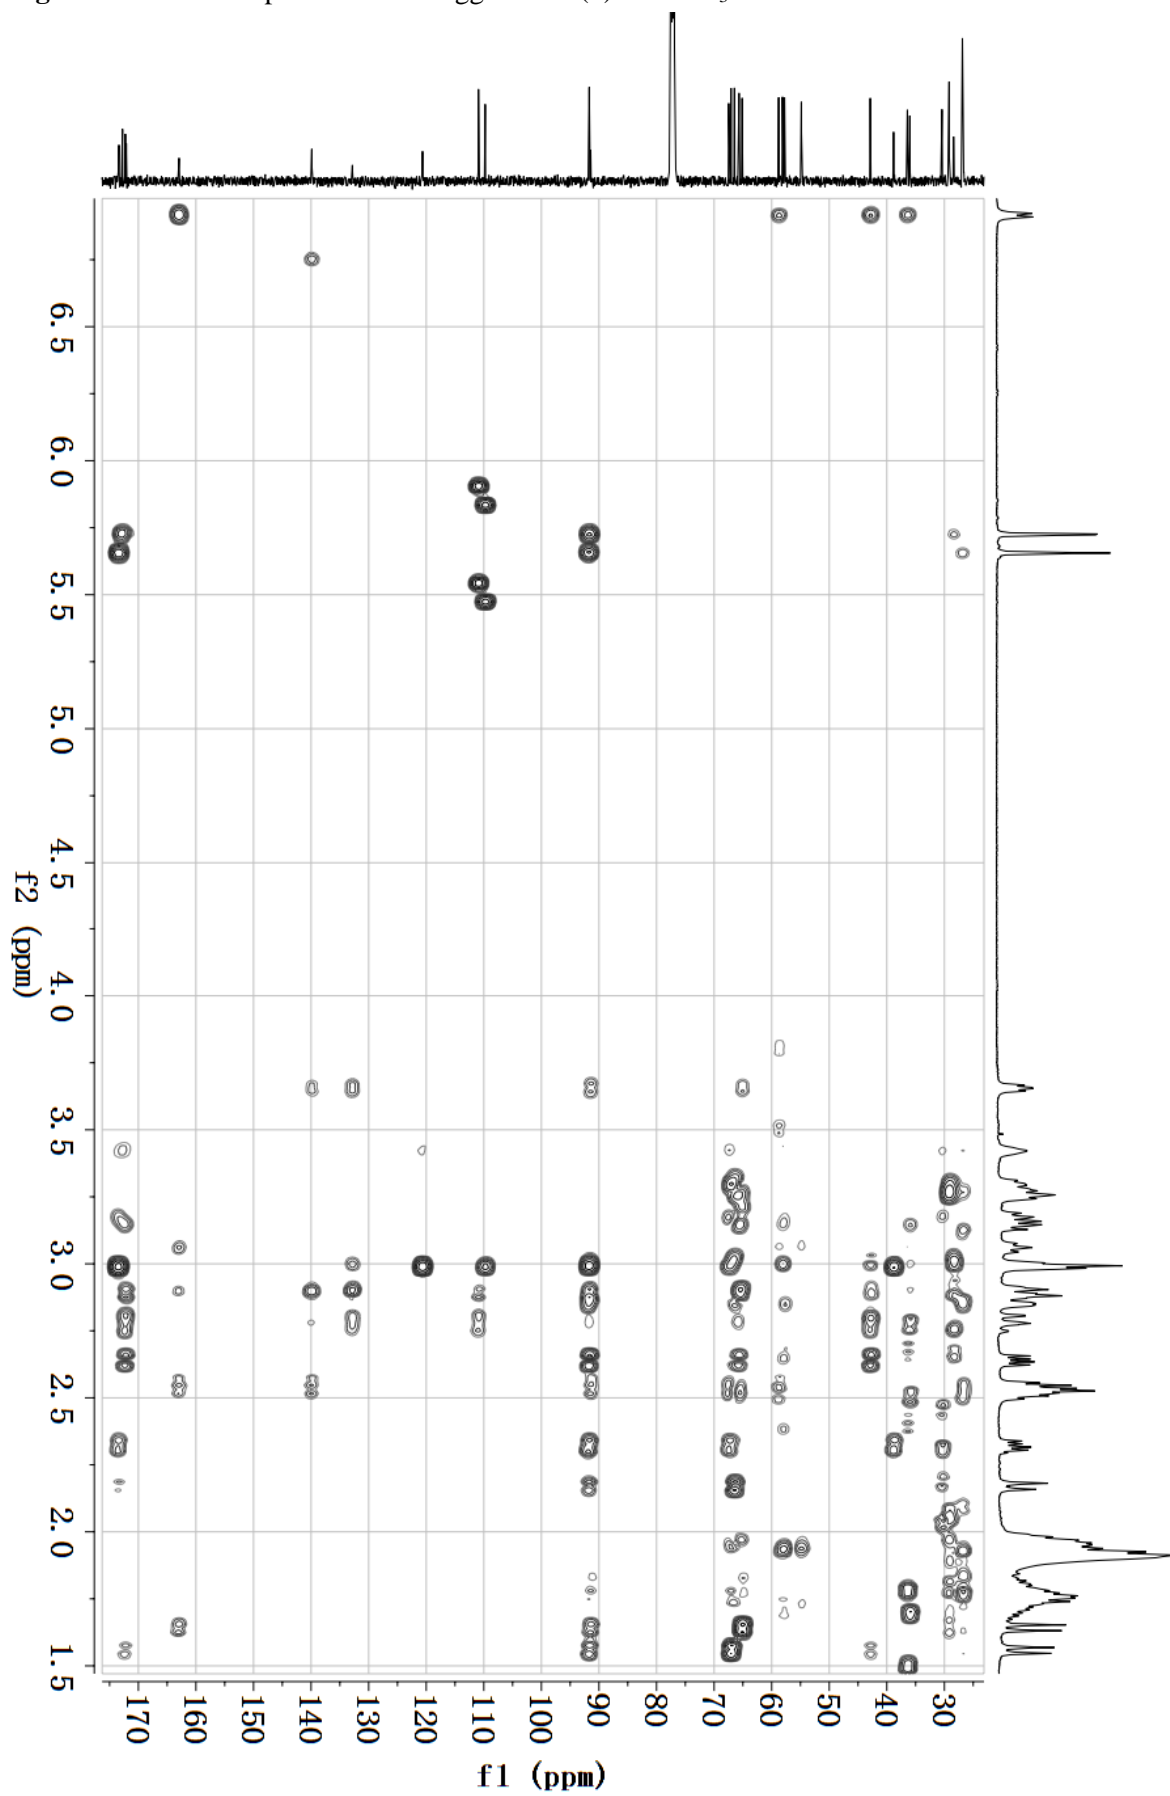

Figure S60. ROESY spectrum for flueggeine F (7) in CDCl<sub>3</sub>.

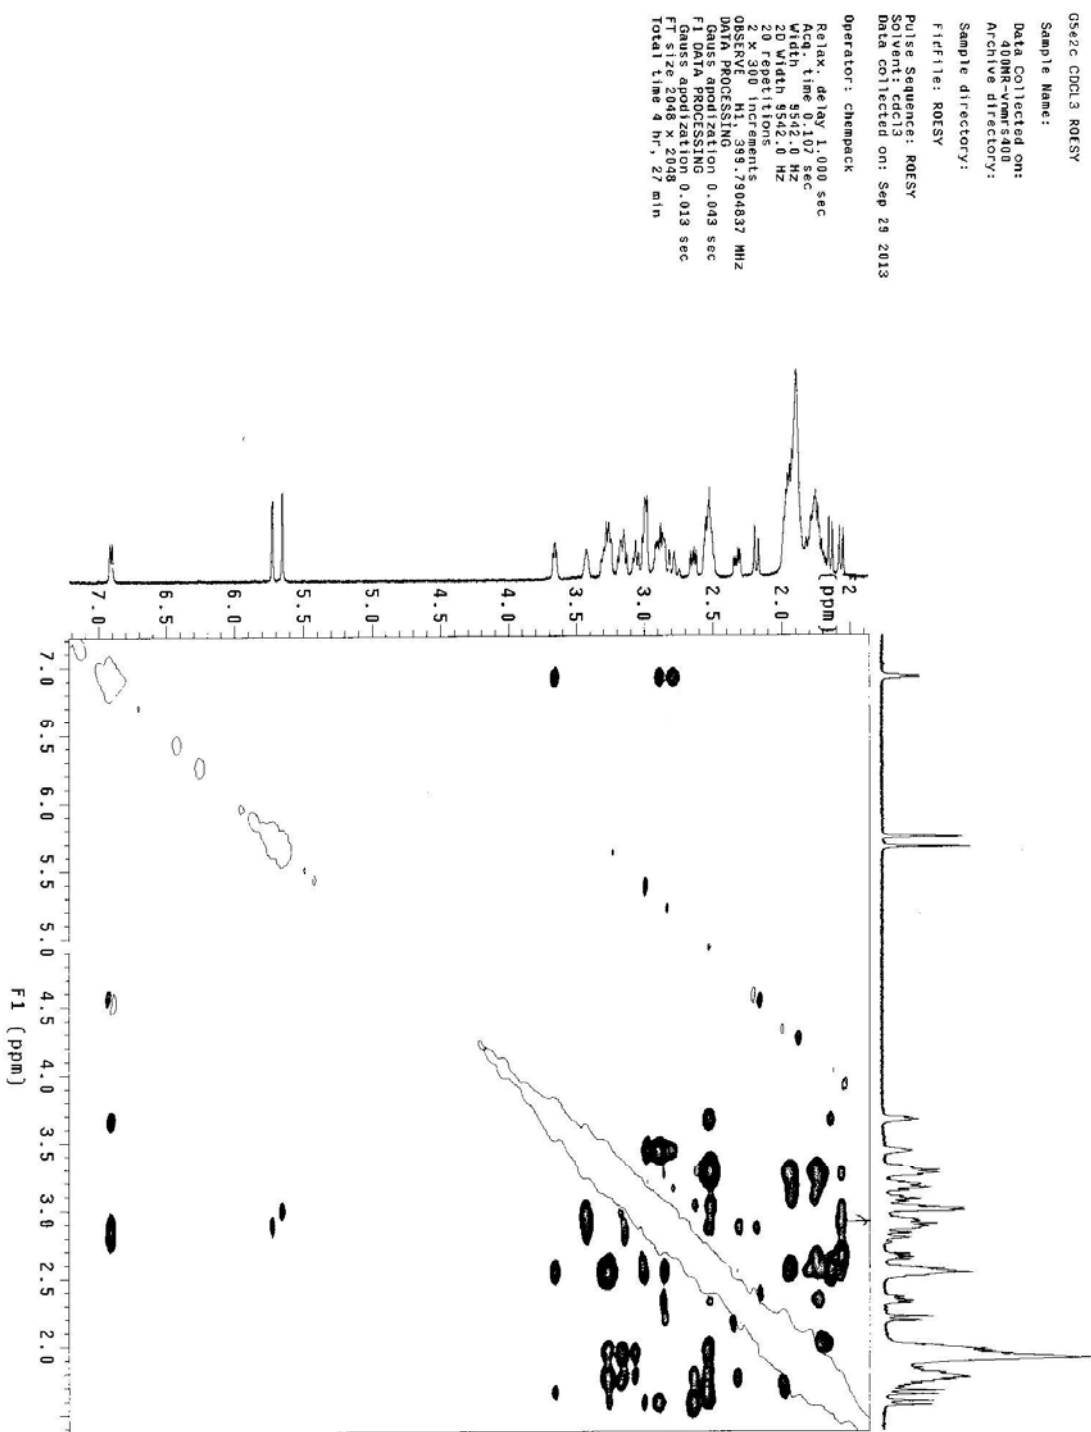

Figure S61. IR spectrum for flueggenine F (7).

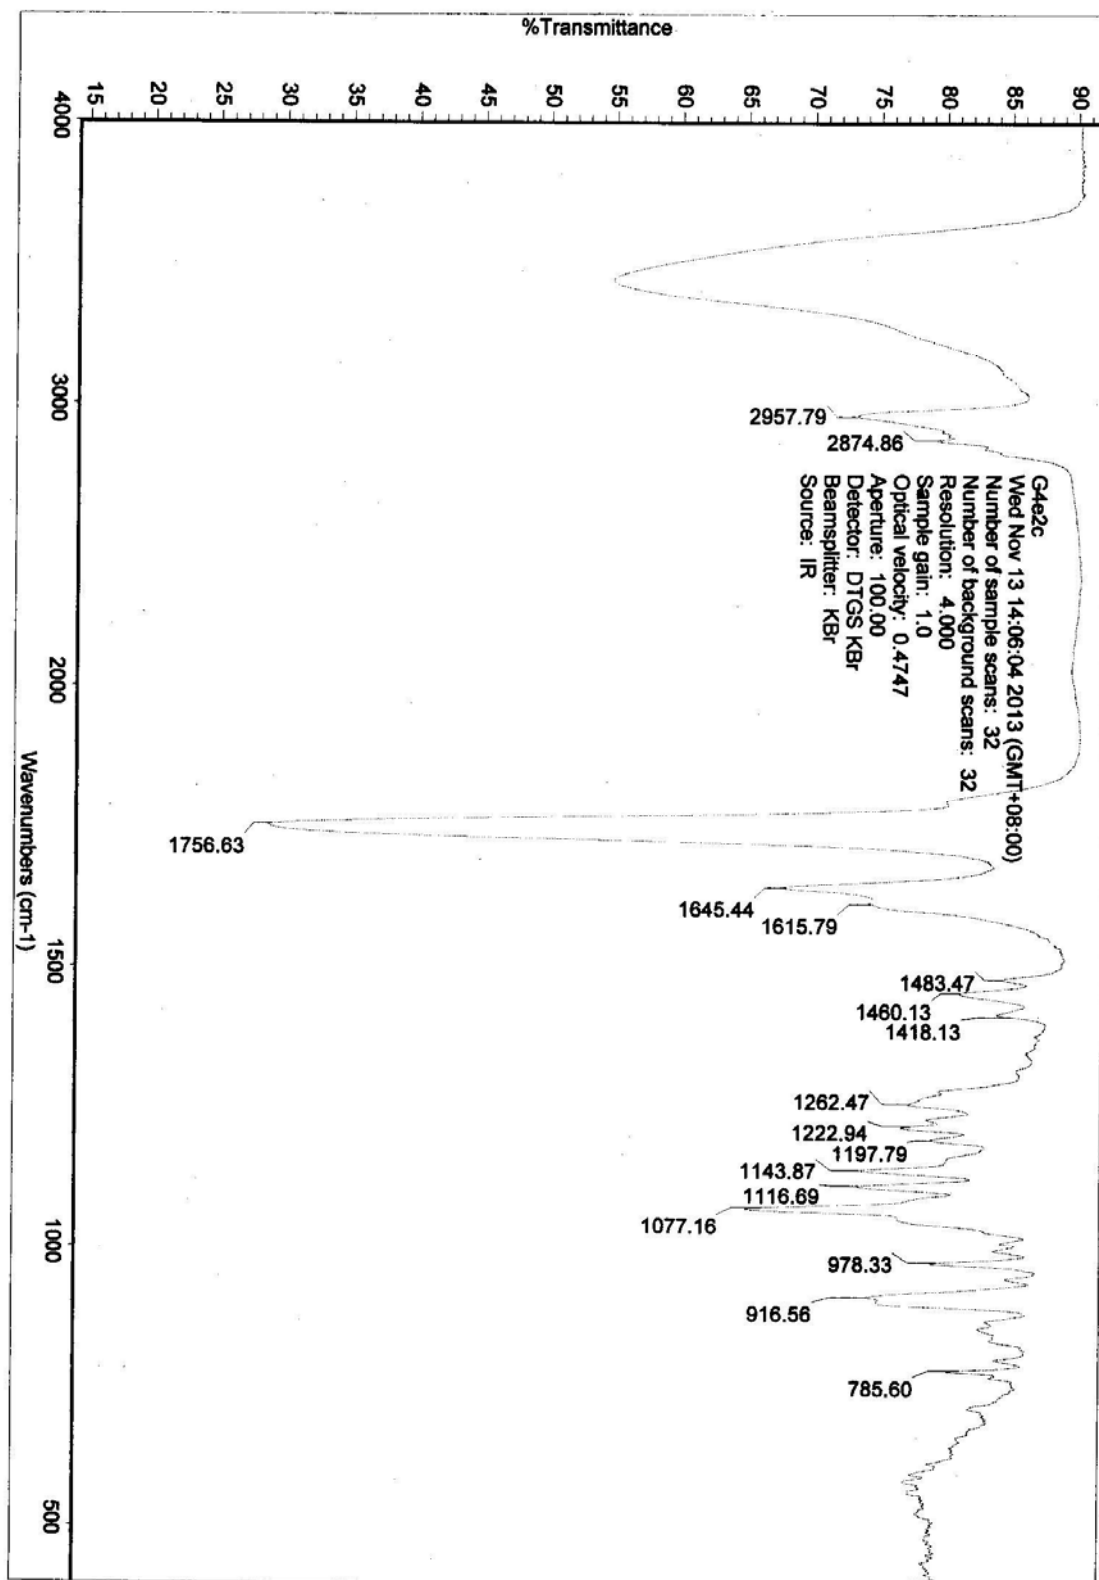



Figure S62. (+)-ESIMS spectrum for flueggeine F (7).

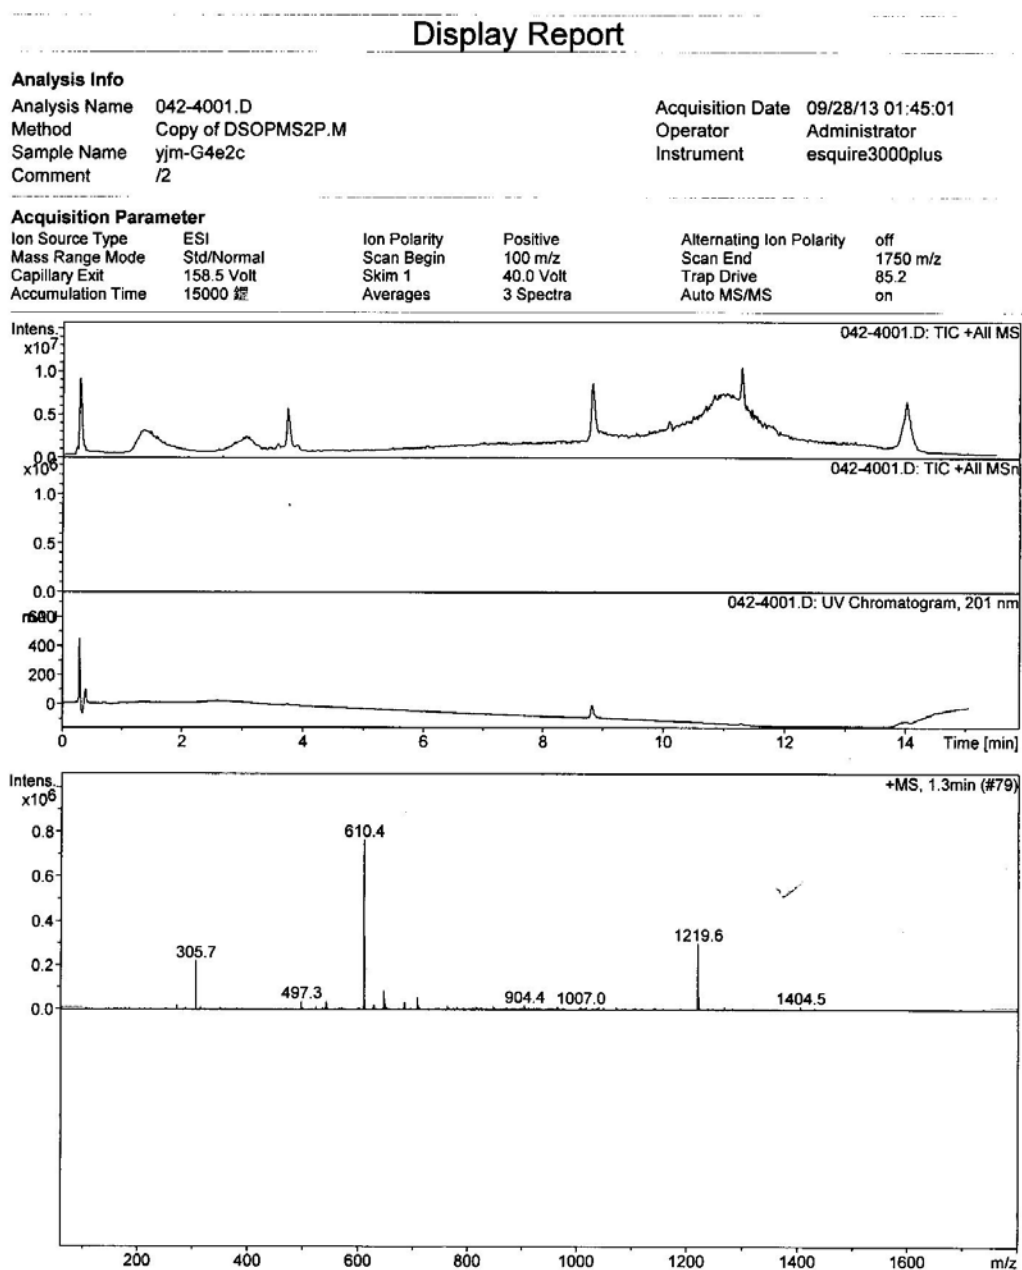

Figure S63. (+)-HRESIMS spectrum for flueggeine F (7).

Elemental Composition Report

Single Mass Analysis

Tolerance = 5.0 PPM / DBE: min = -1.5, max = 50.0

Element prediction: Off

Number of isotope peaks used for i-FIT = 3

Monoisotopic Mass, Even Electron Ions

628 formula(e) evaluated with 3 results within limits (up to 50 closest results for each mass)

Elements Used:

C: 5-80 H: 2-120 N: 0-4 O: 0-20

G4e2c

LCT PXE KE324

27-Sep-2013

10:01:36

1: TOF MS ES+

6.06e+004

G4e2c\_0927 19 (0.422) AM2 (Ar,11000.0,0.00,0.70); ABS; Cm (15.62)

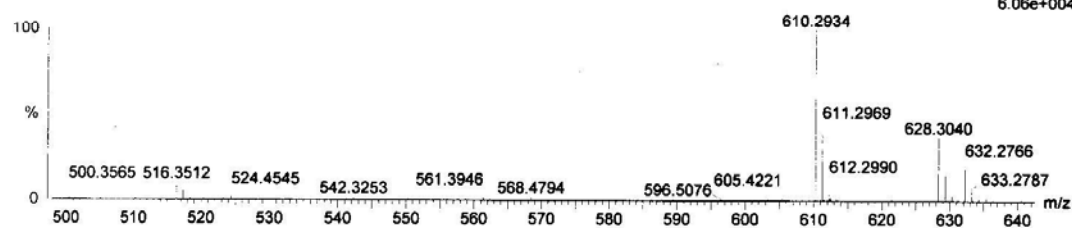

Minimum: -1.5  
Maximum: 50.0

| Mass     | Calc. Mass | mDa  | PPM  | DBE  | i-FIT | i-FIT (Norm) | Formula         |
|----------|------------|------|------|------|-------|--------------|-----------------|
| 610.2934 | 610.2922   | 1.2  | 2.0  | 0.5  | 143.1 | 7.7          | C23 H48 N O17   |
|          | 610.2917   | 1.7  | 2.8  | 18.5 | 135.3 | 0.0          | C36 H40 N3 O6 ✓ |
|          | 610.2957   | -2.3 | -3.8 | 22.5 | 142.2 | 6.9          | C41 H40 N O4    |

Figure S64.  $^1\text{H}$  NMR spectrum for flueviroisine G (**8**) in  $\text{CDCl}_3$ .

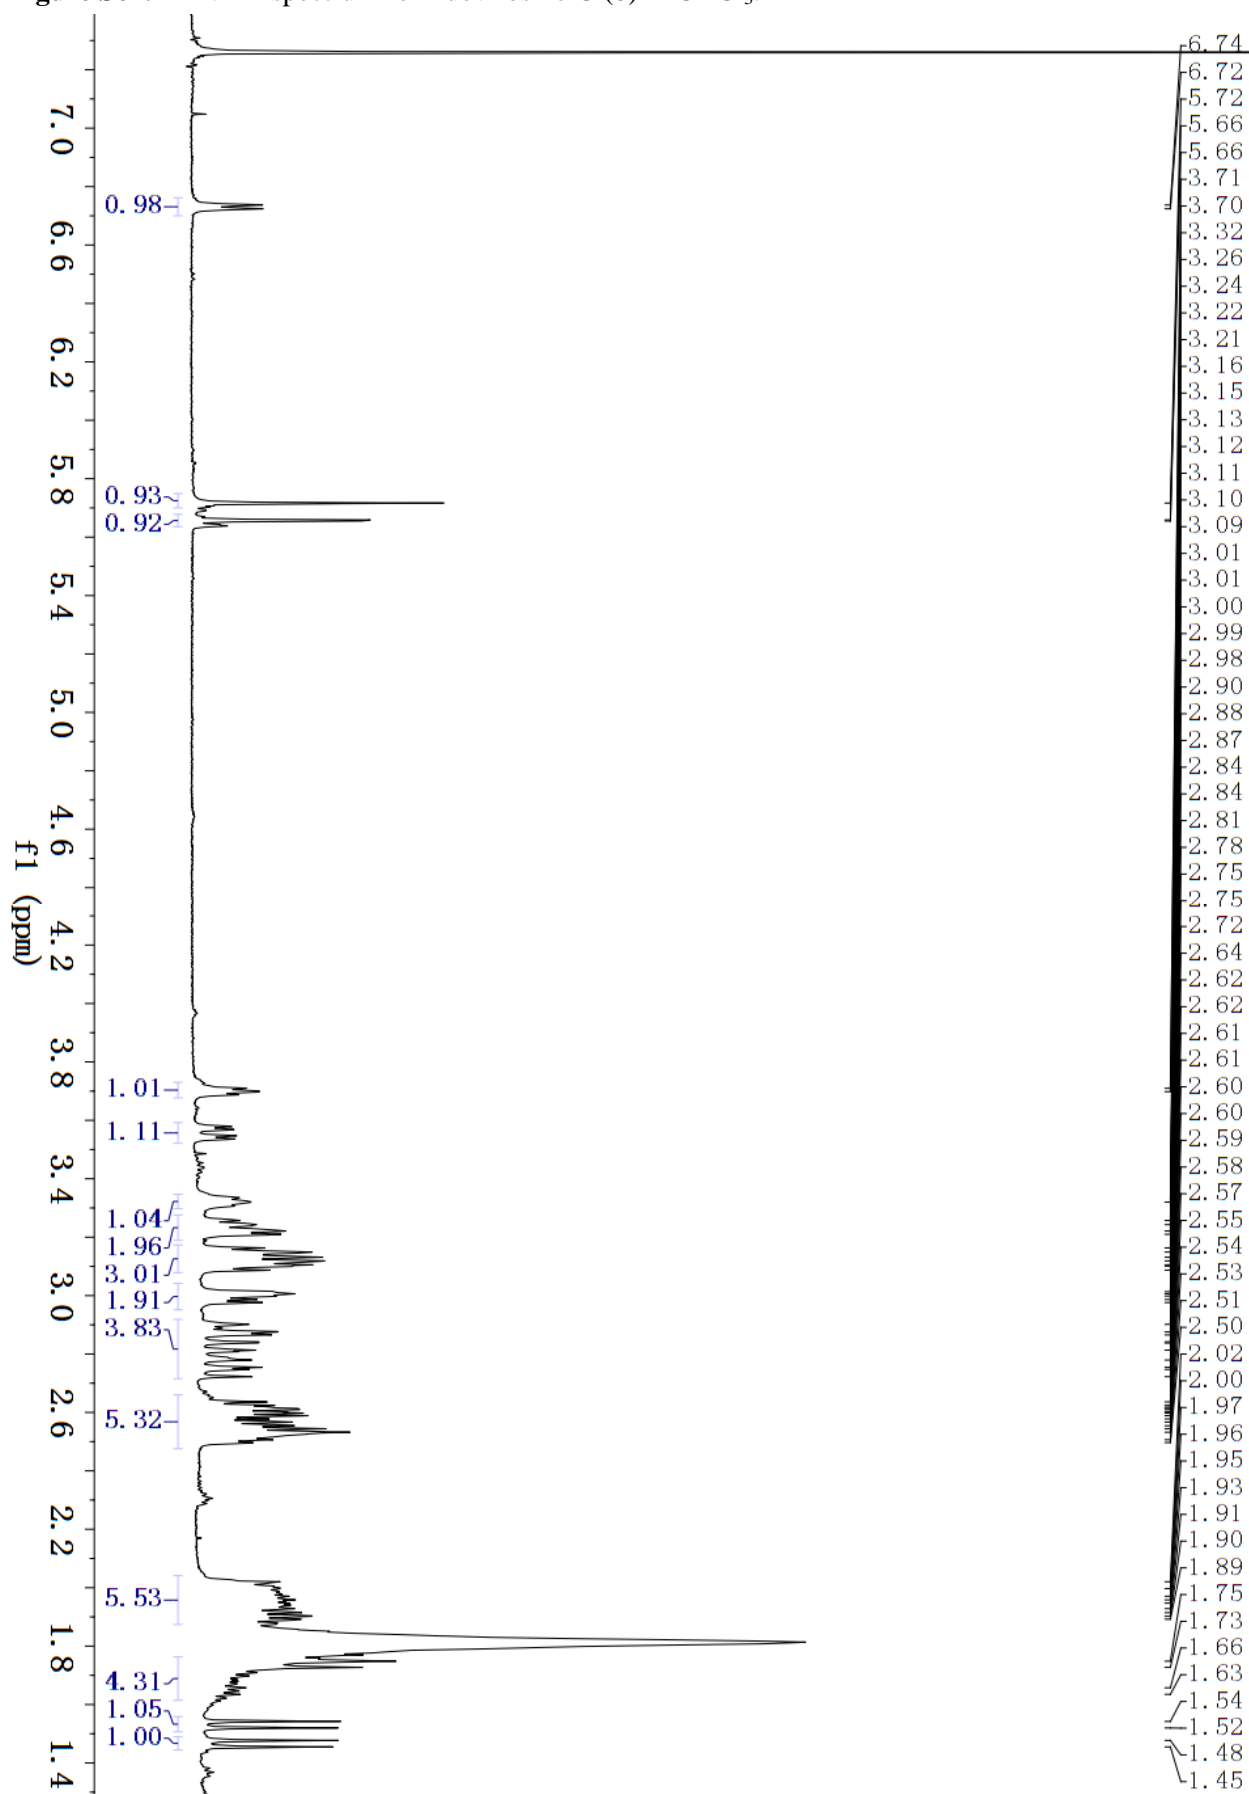

Figure S65.  $^{13}\text{C}$  NMR spectrum for flueggenine G (**8**) in  $\text{CDCl}_3$ .

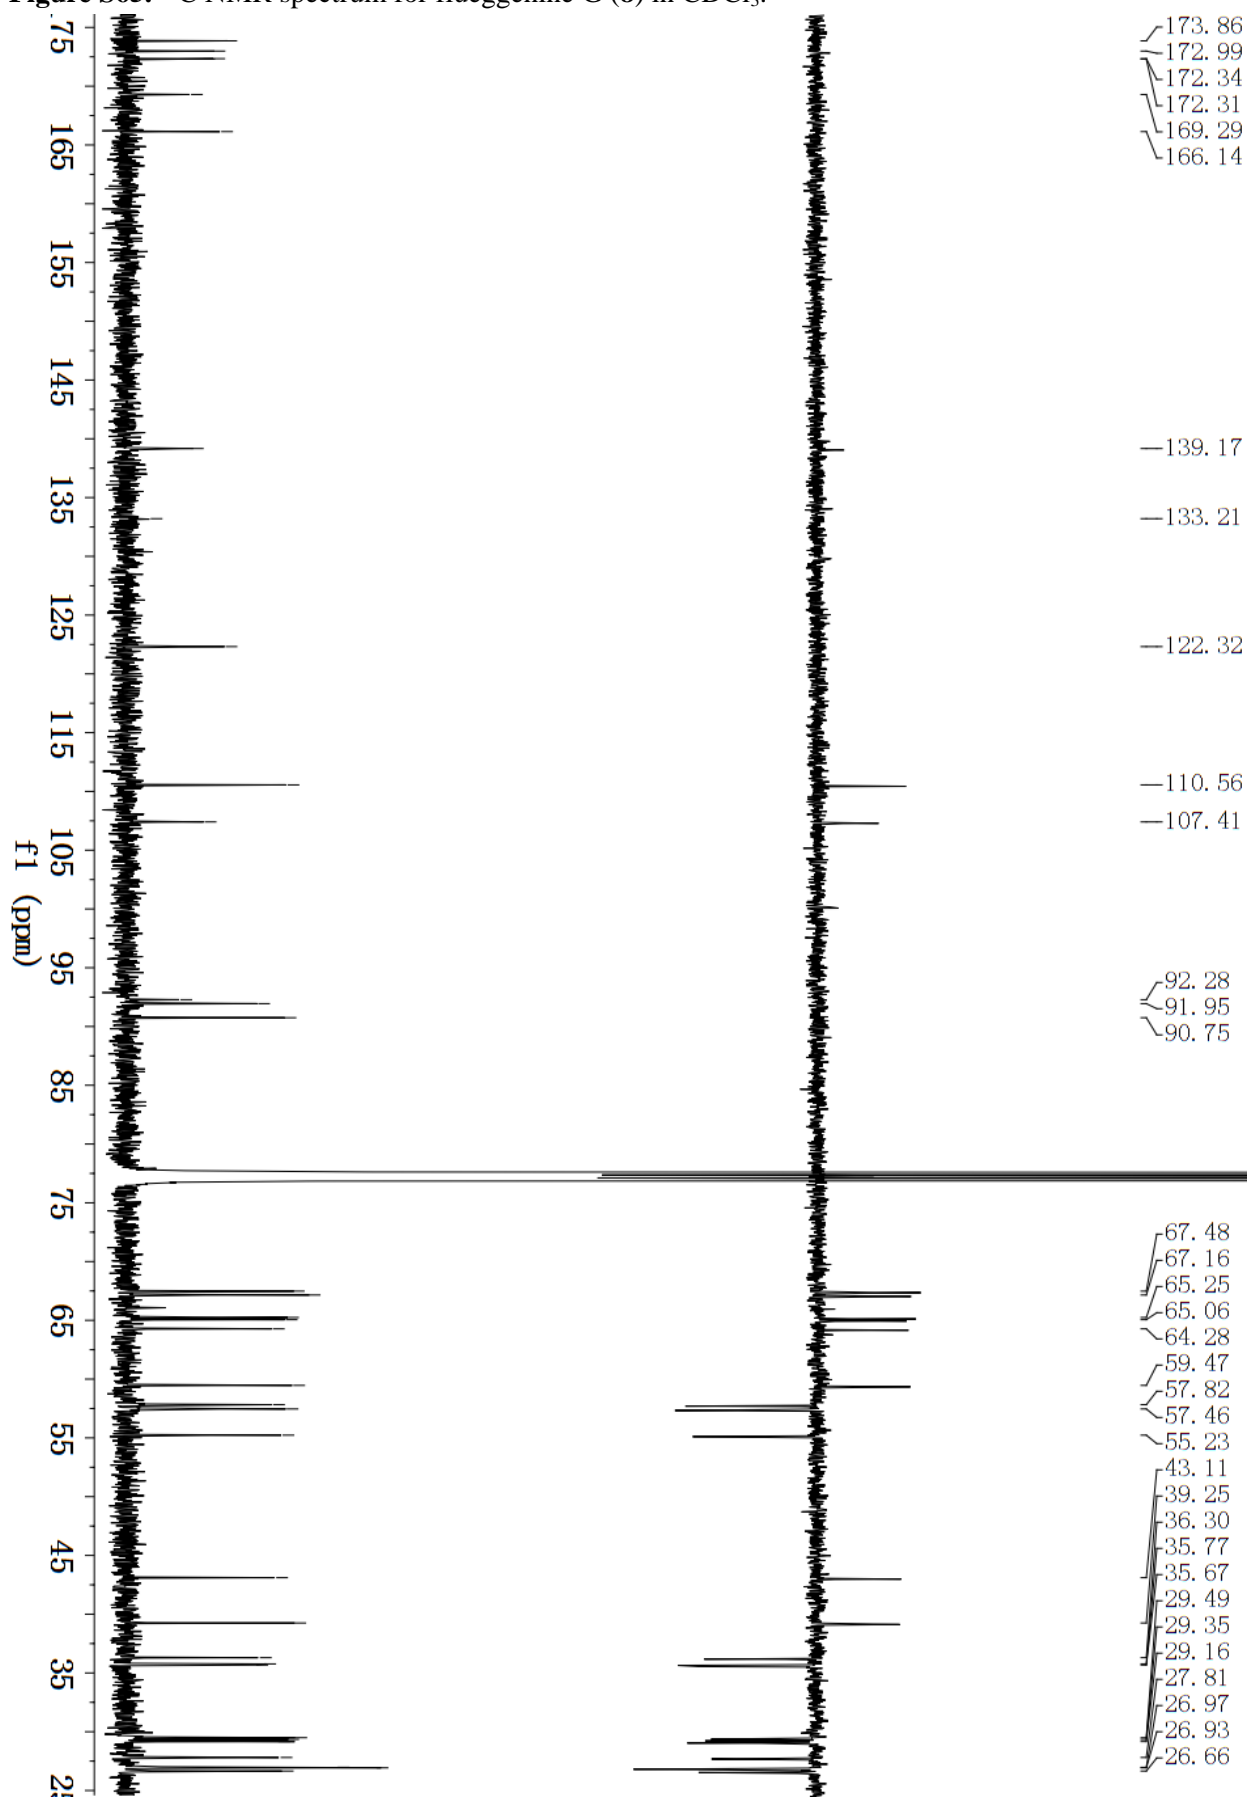

Figure S66.  $^1\text{H}$ - $^1\text{H}$  COSY spectrum for flueggeine G (**8**) in  $\text{CDCl}_3$ .

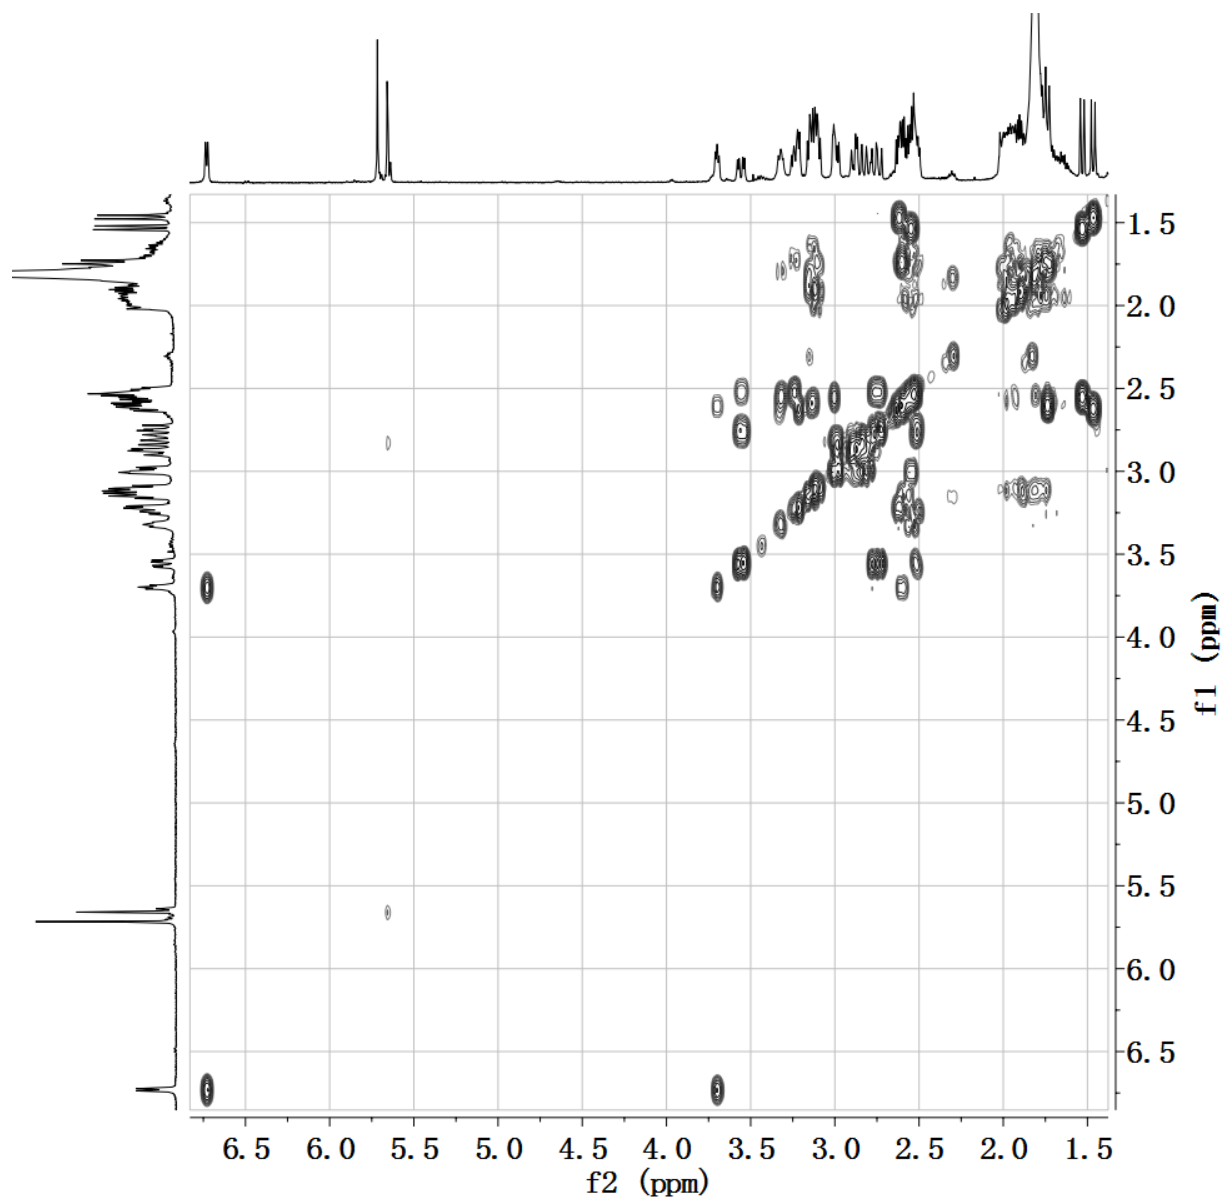

Figure S67. HSQC spectrum for flueggeine G (8) CDCl<sub>3</sub>.

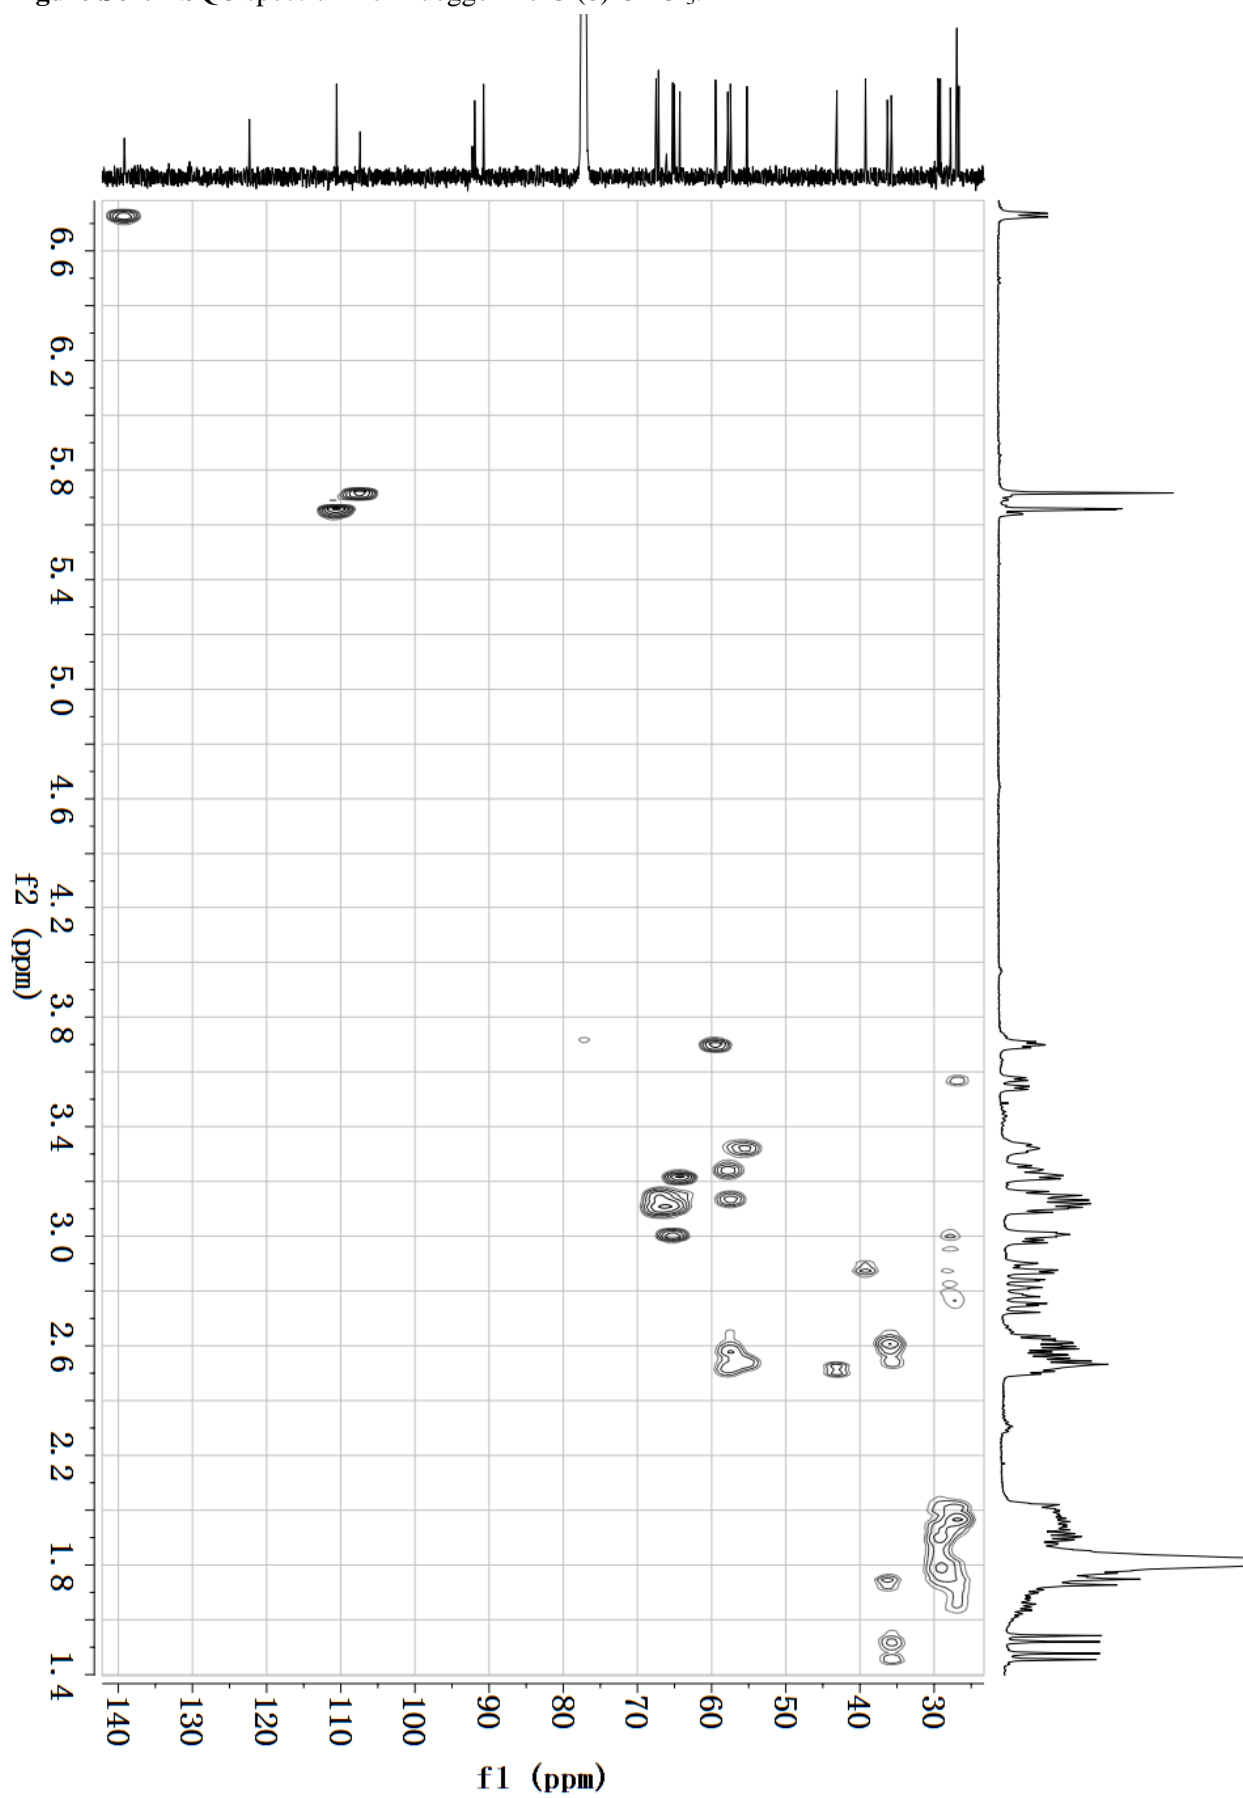

Figure S68. HMBC spectrum for flueggeine G (**8**) in CDCl<sub>3</sub>.

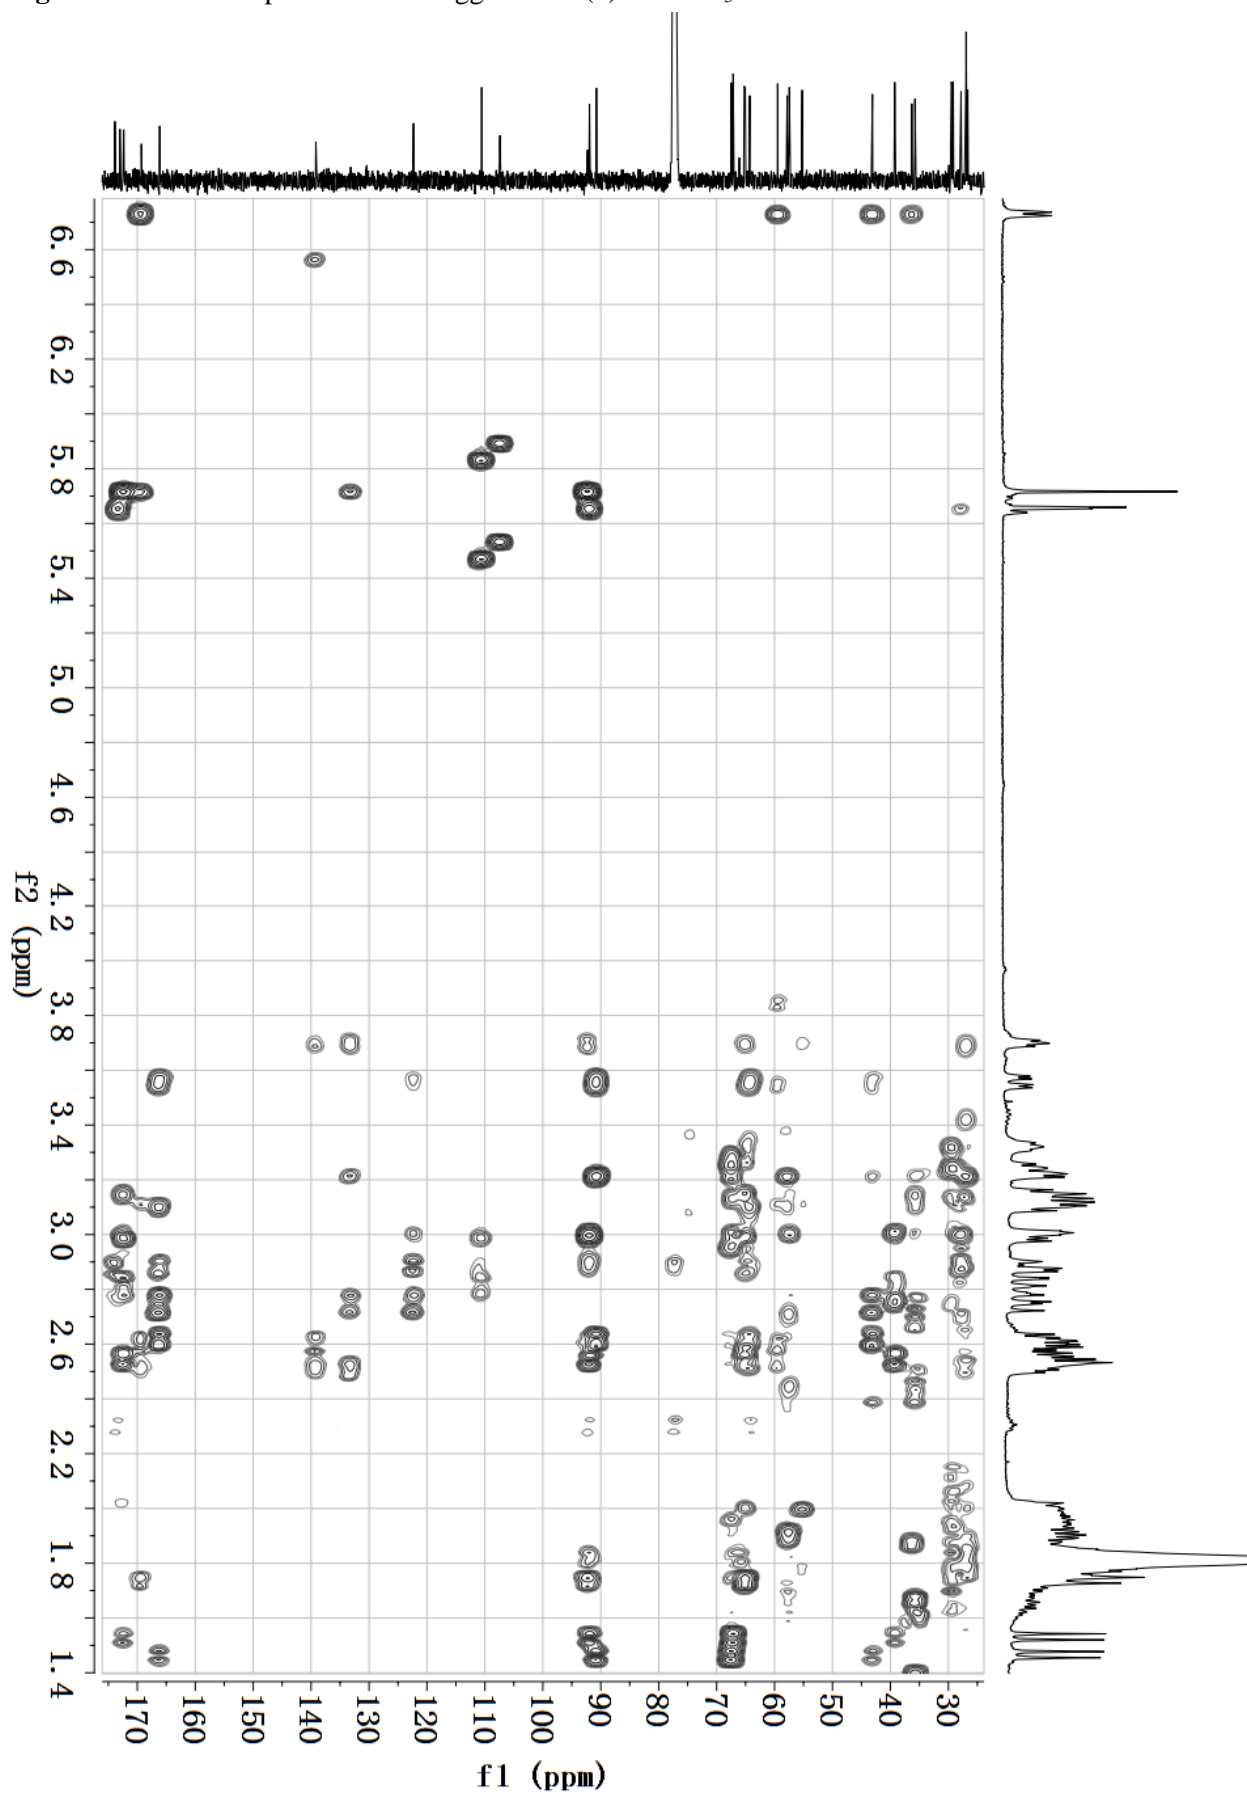

Figure S69. ROESY spectrum for flueggeanine G (8) in CDCl<sub>3</sub>.

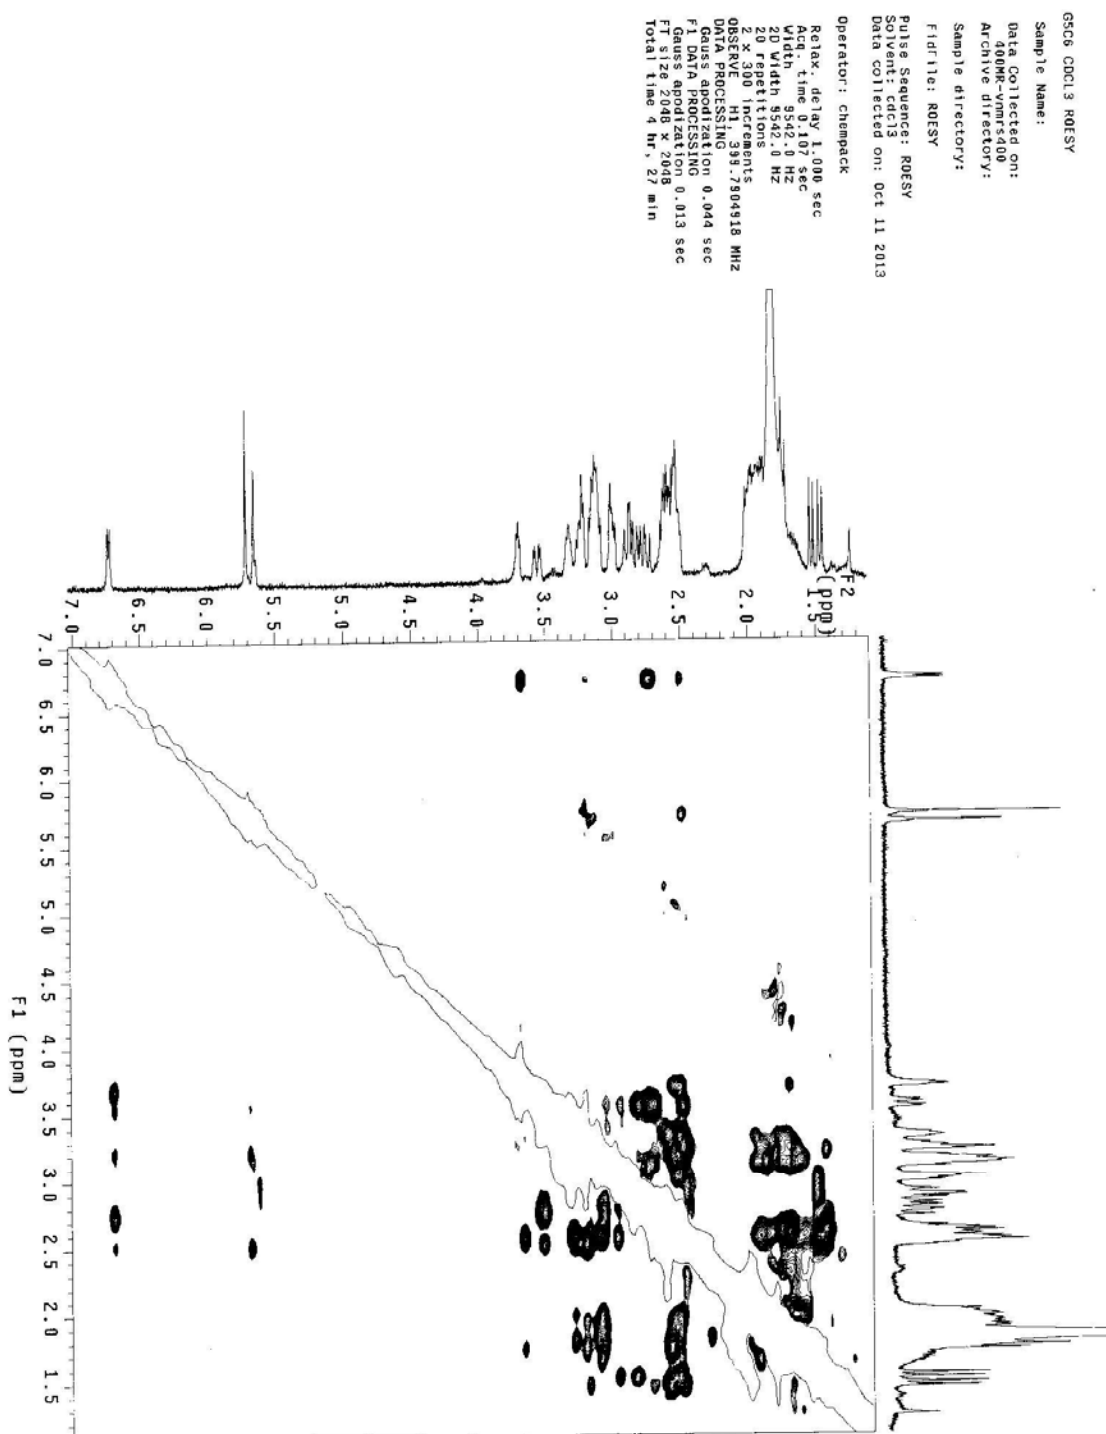



Figure S70. IR spectrum for flueggenine G (8).

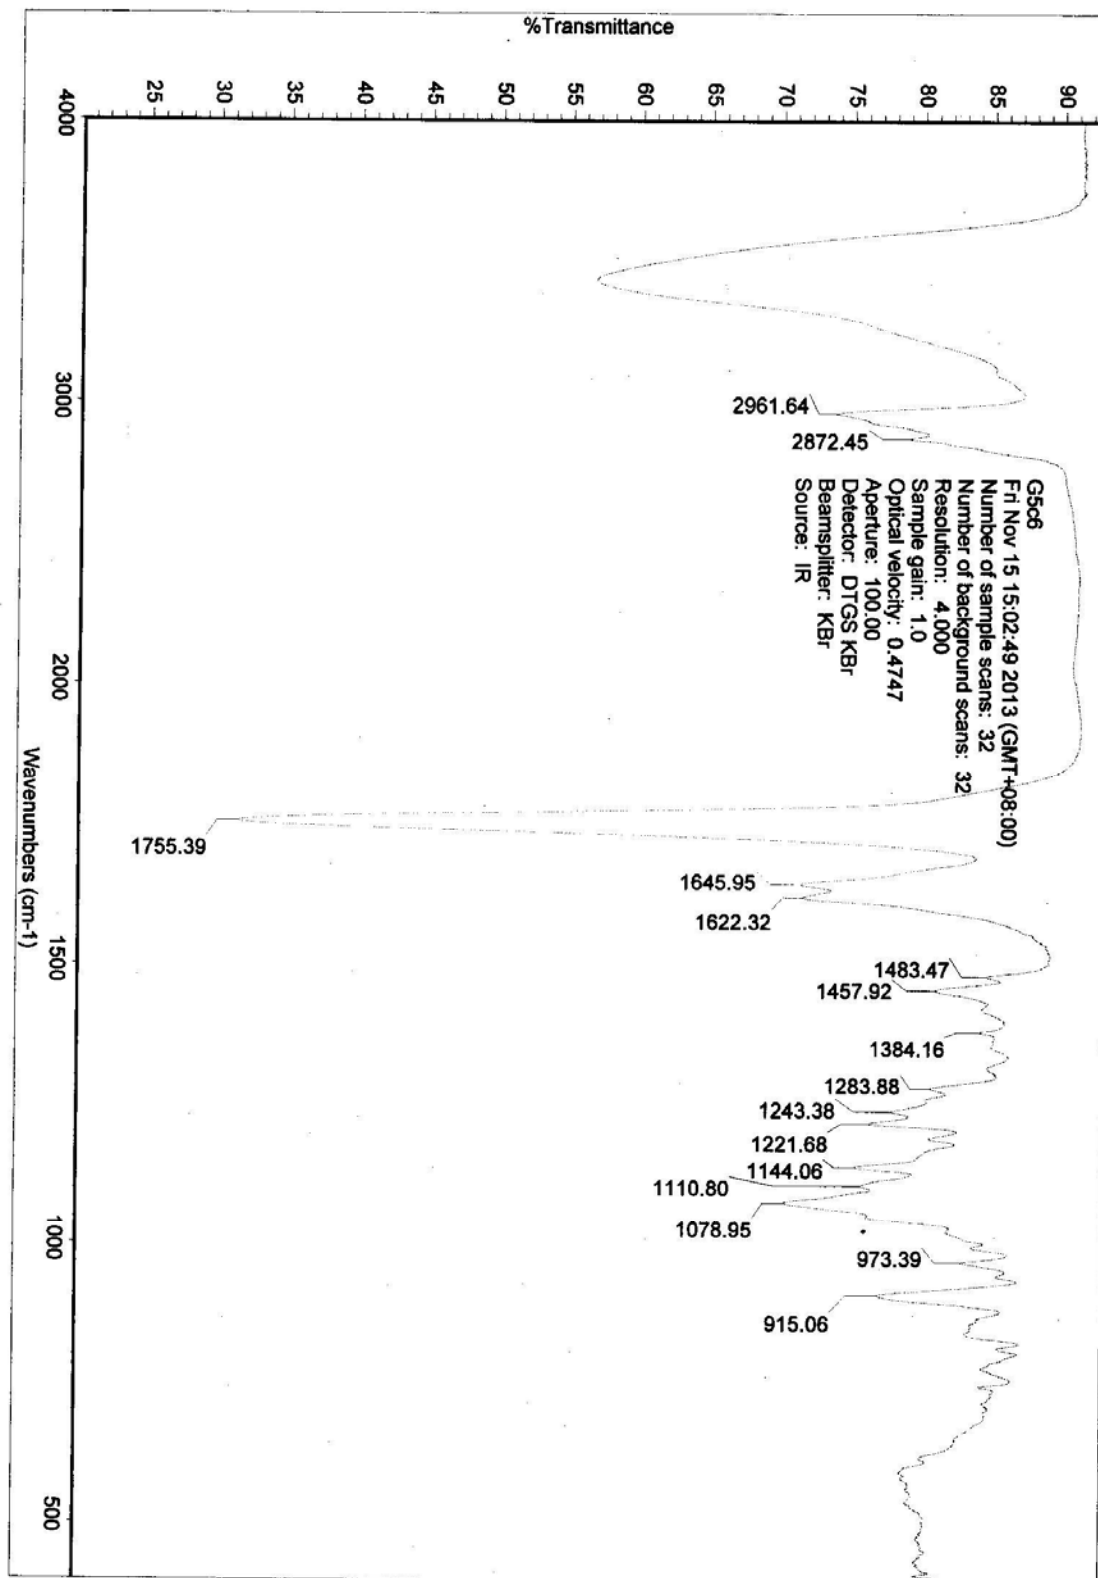

Figure S71. (+)-ESIMS spectrum for flueggeanine G (8).

### Display Report

#### Analysis Info

|               |                    |                  |                   |
|---------------|--------------------|------------------|-------------------|
| Analysis Name | 041-8601.D         | Acquisition Date | 10/16/13 08:22:31 |
| Method        | Copy of DSOPMS2P.M | Operator         | Administrator     |
| Sample Name   | yjm-G5C6           | Instrument       | esquire3000plus   |
| Comment       | 喘                  |                  |                   |

#### Acquisition Parameter

|                   |            |              |           |                          |          |
|-------------------|------------|--------------|-----------|--------------------------|----------|
| Ion Source Type   | ESI        | Ion Polarity | Positive  | Alternating Ion Polarity | off      |
| Mass Range Mode   | Std/Normal | Scan Begin   | 100 m/z   | Scan End                 | 1750 m/z |
| Capillary Exit    | 158.5 Volt | Skim 1       | 40.0 Volt | Trap Drive               | 85.2     |
| Accumulation Time | 15000 罫    | Averages     | 3 Spectra | Auto MS/MS               | on       |

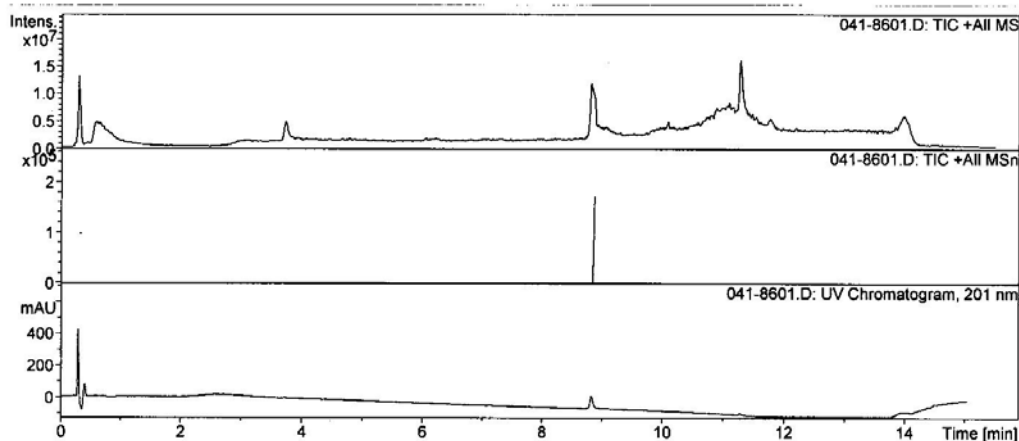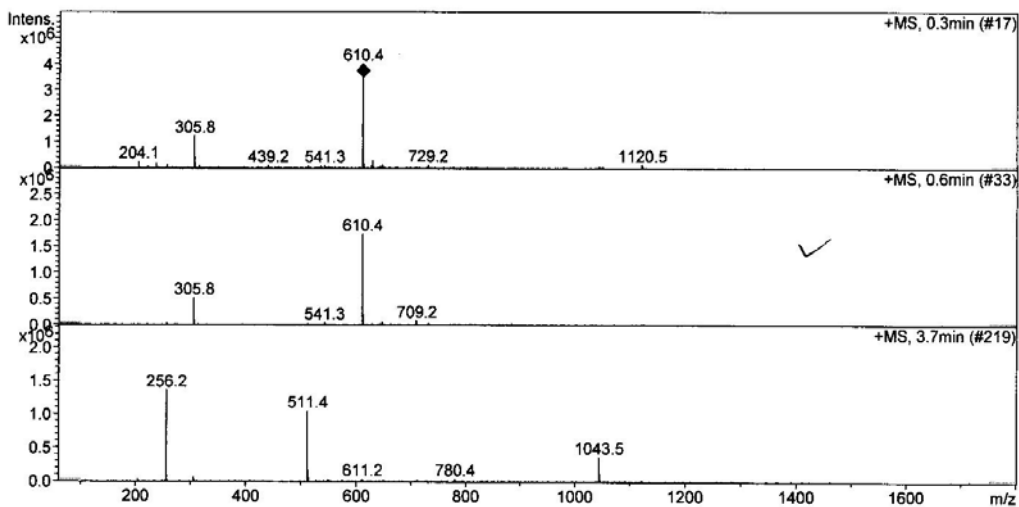

Figure S72. (+)-HRESIMS spectrum for flueggenine G (8).

Elemental Composition Report

Single Mass Analysis

Tolerance = 5.0 PPM / DBE: min = -1.5, max = 50.0

Element prediction: Off

Number of isotope peaks used for i-FIT = 3

Monoisotopic Mass, Even Electron Ions

628 formula(e) evaluated with 2 results within limits (up to 50 closest results for each mass)

Elements Used:

C: 5-80 H: 2-120 N: 0-4 O: 0-20

G5c6

LCT PXE KE324

10-Oct-2013

16:25:50

1: TOF MS ES+

1.93e+004

G5c6\_1010 24 (0.510) AM2 (Ar,10000.0,0.00,1.00); ABS; Cm (22:45)

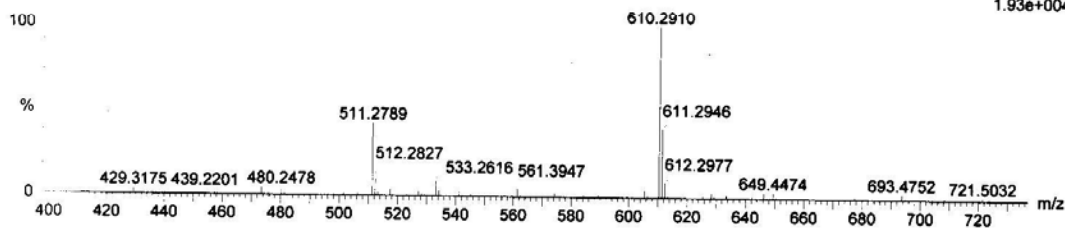

Minimum: -1.5  
Maximum: 3.0 5.0 50.0

| Mass     | Calc. Mass | mDa  | PPM  | DBE  | i-FIT | i-FIT (Norm) | Formula       |
|----------|------------|------|------|------|-------|--------------|---------------|
| 610.2910 | 610.2917   | -0.7 | -1.1 | 18.5 | 89.9  | 0.0          | C36 H40 N3 O6 |
|          | 610.2922   | -1.2 | -2.0 | 0.5  | 96.7  | 6.8          | C23 H48 N O17 |

Figure S73.  $^1\text{H}$  NMR spectrum for flueviroisine H (**9**) in  $\text{CDCl}_3$ .

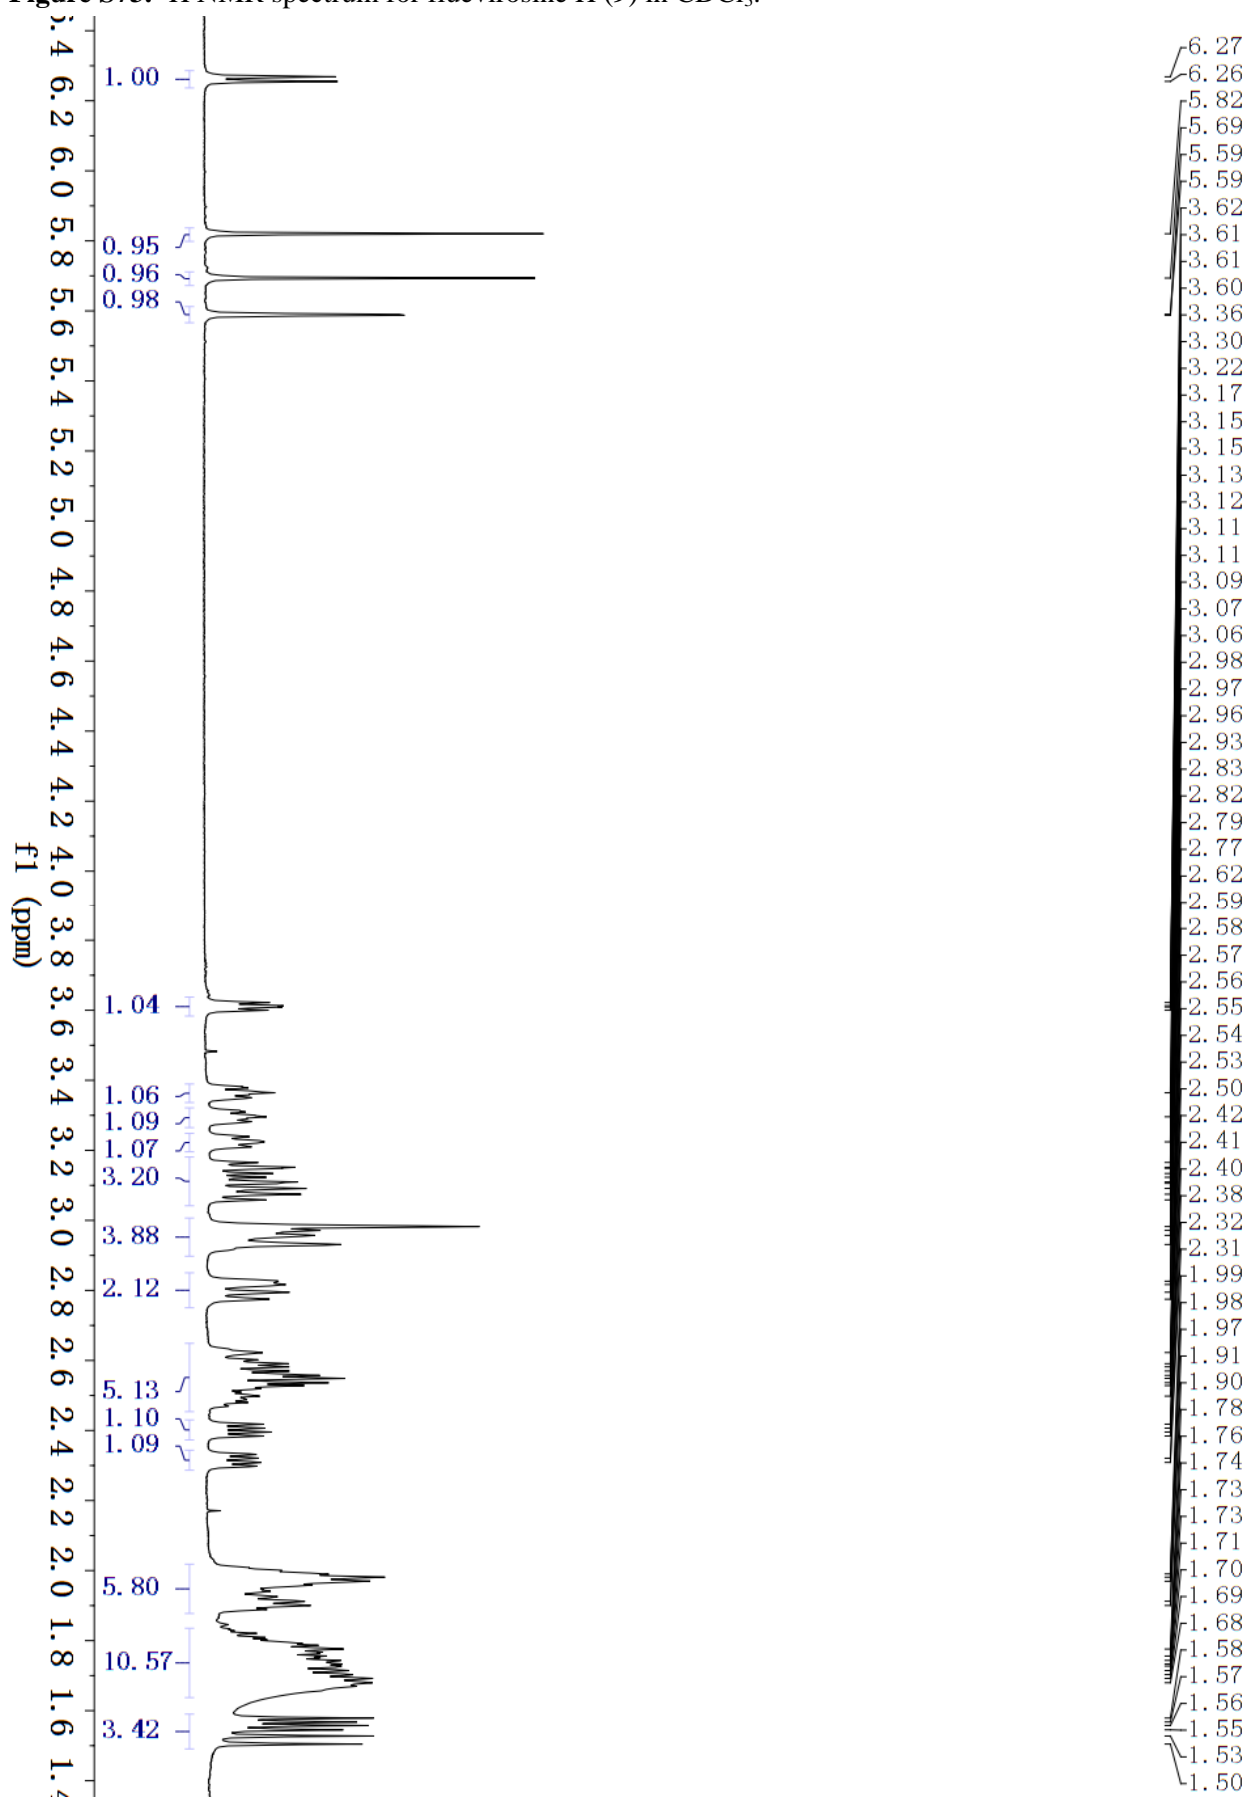

Figure S74.  $^{13}\text{C}$  NMR spectrum for flueggeanine H (9) in  $\text{CDCl}_3$ .

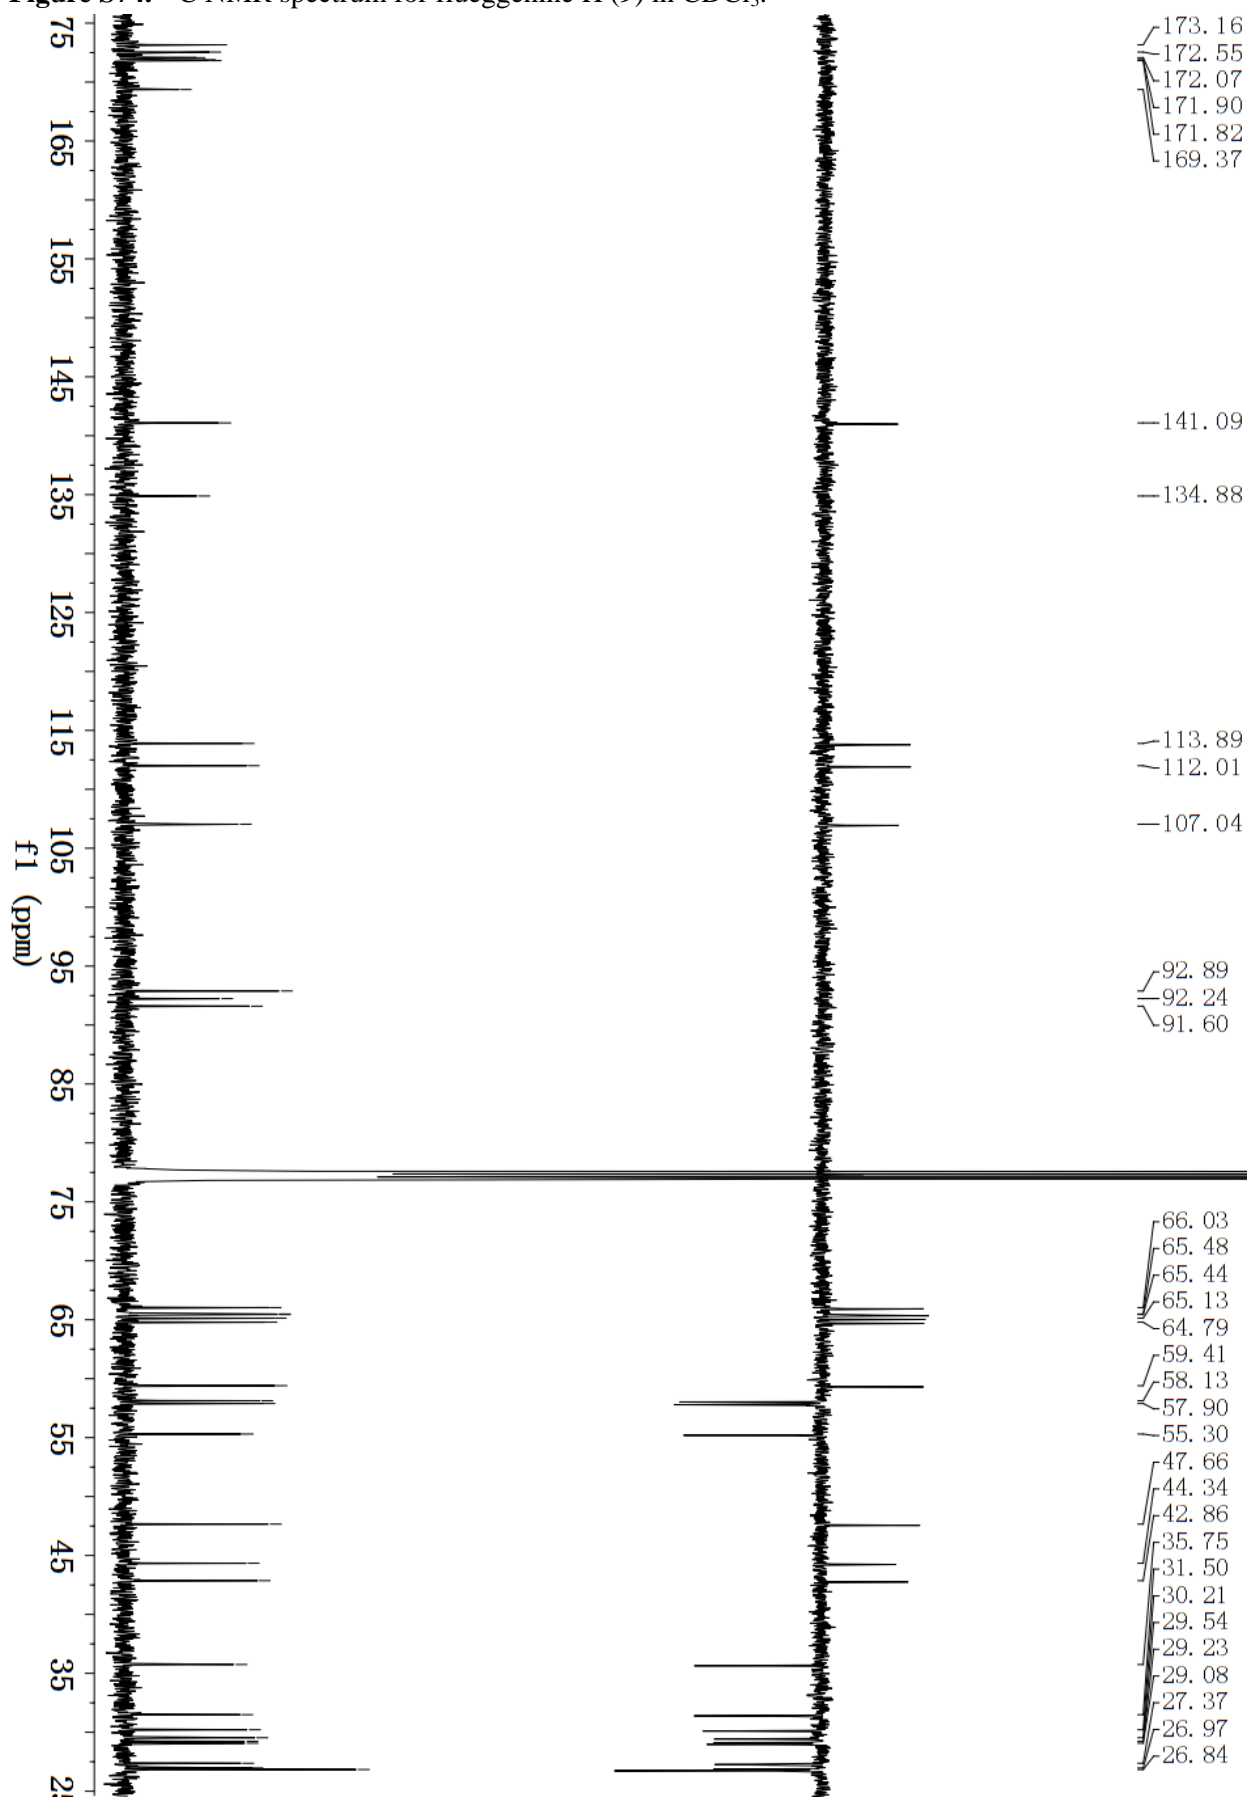

Figure S75.  $^1\text{H}$ - $^1\text{H}$  COSY spectrum for flueggeanine H (9) in  $\text{CDCl}_3$ .

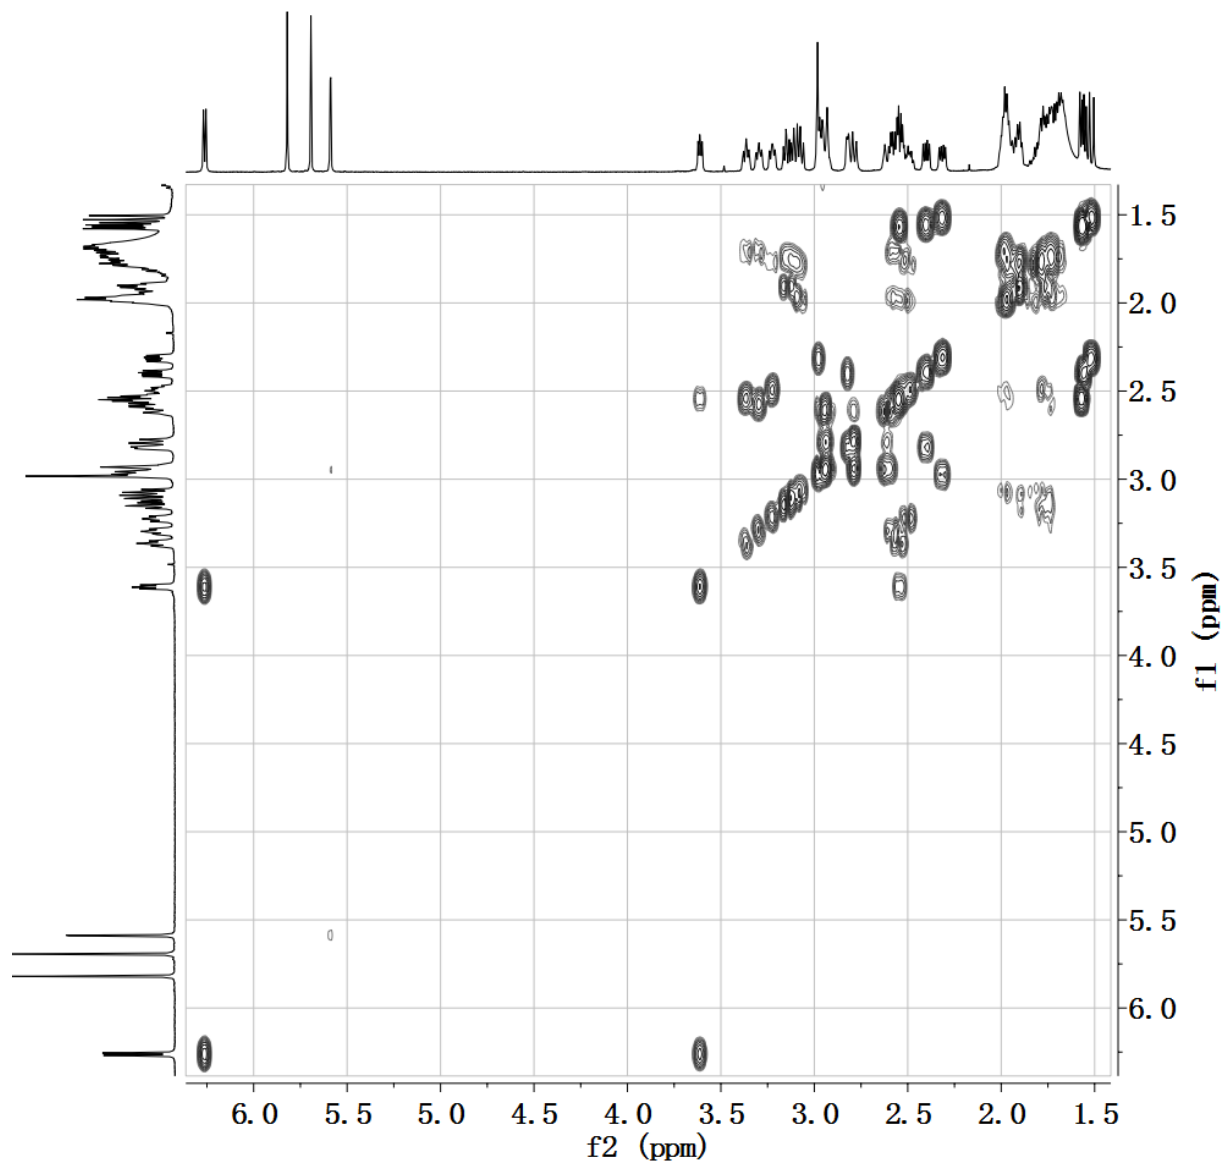

Figure S76. HSQC spectrum for flueggeine H (9) CDCl<sub>3</sub>.

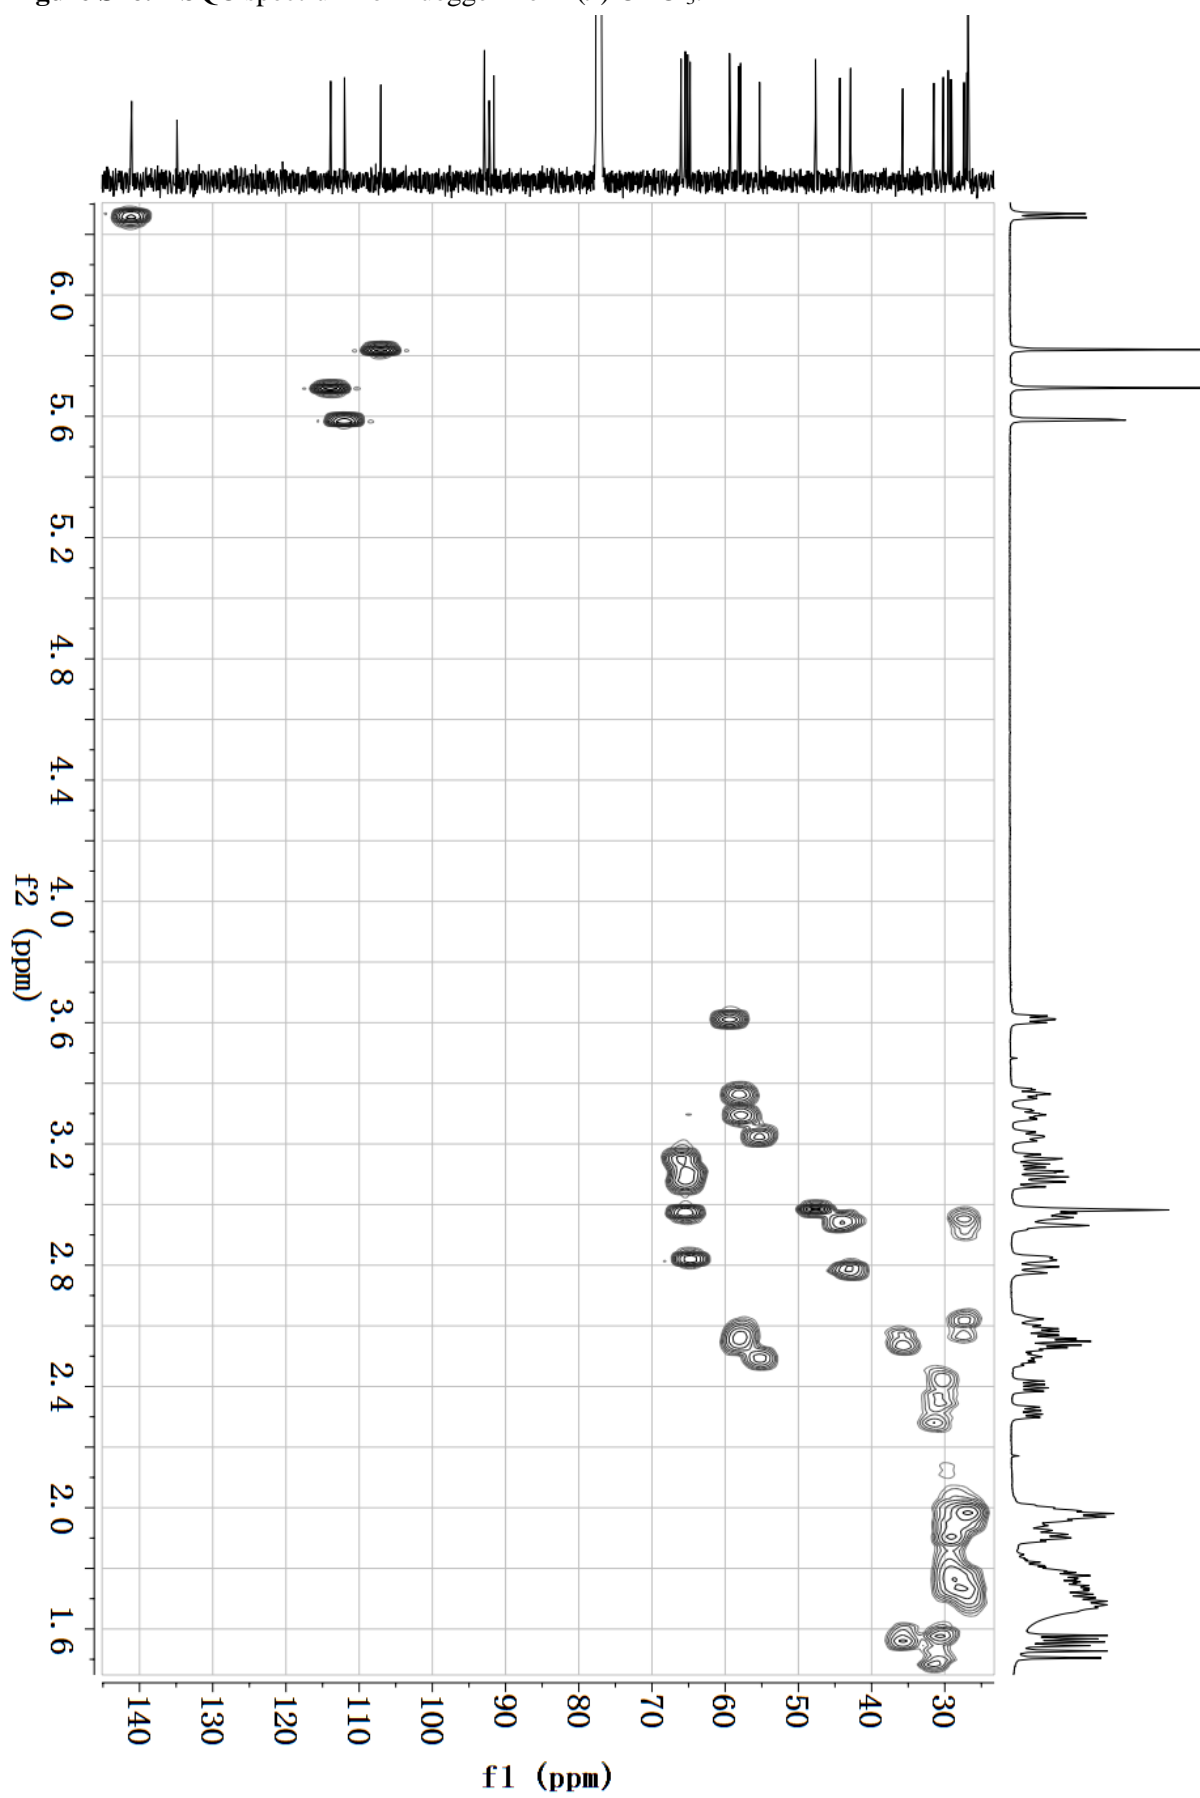

Figure S77. HMBC spectrum for flueggeine H (9) in CDCl<sub>3</sub>.

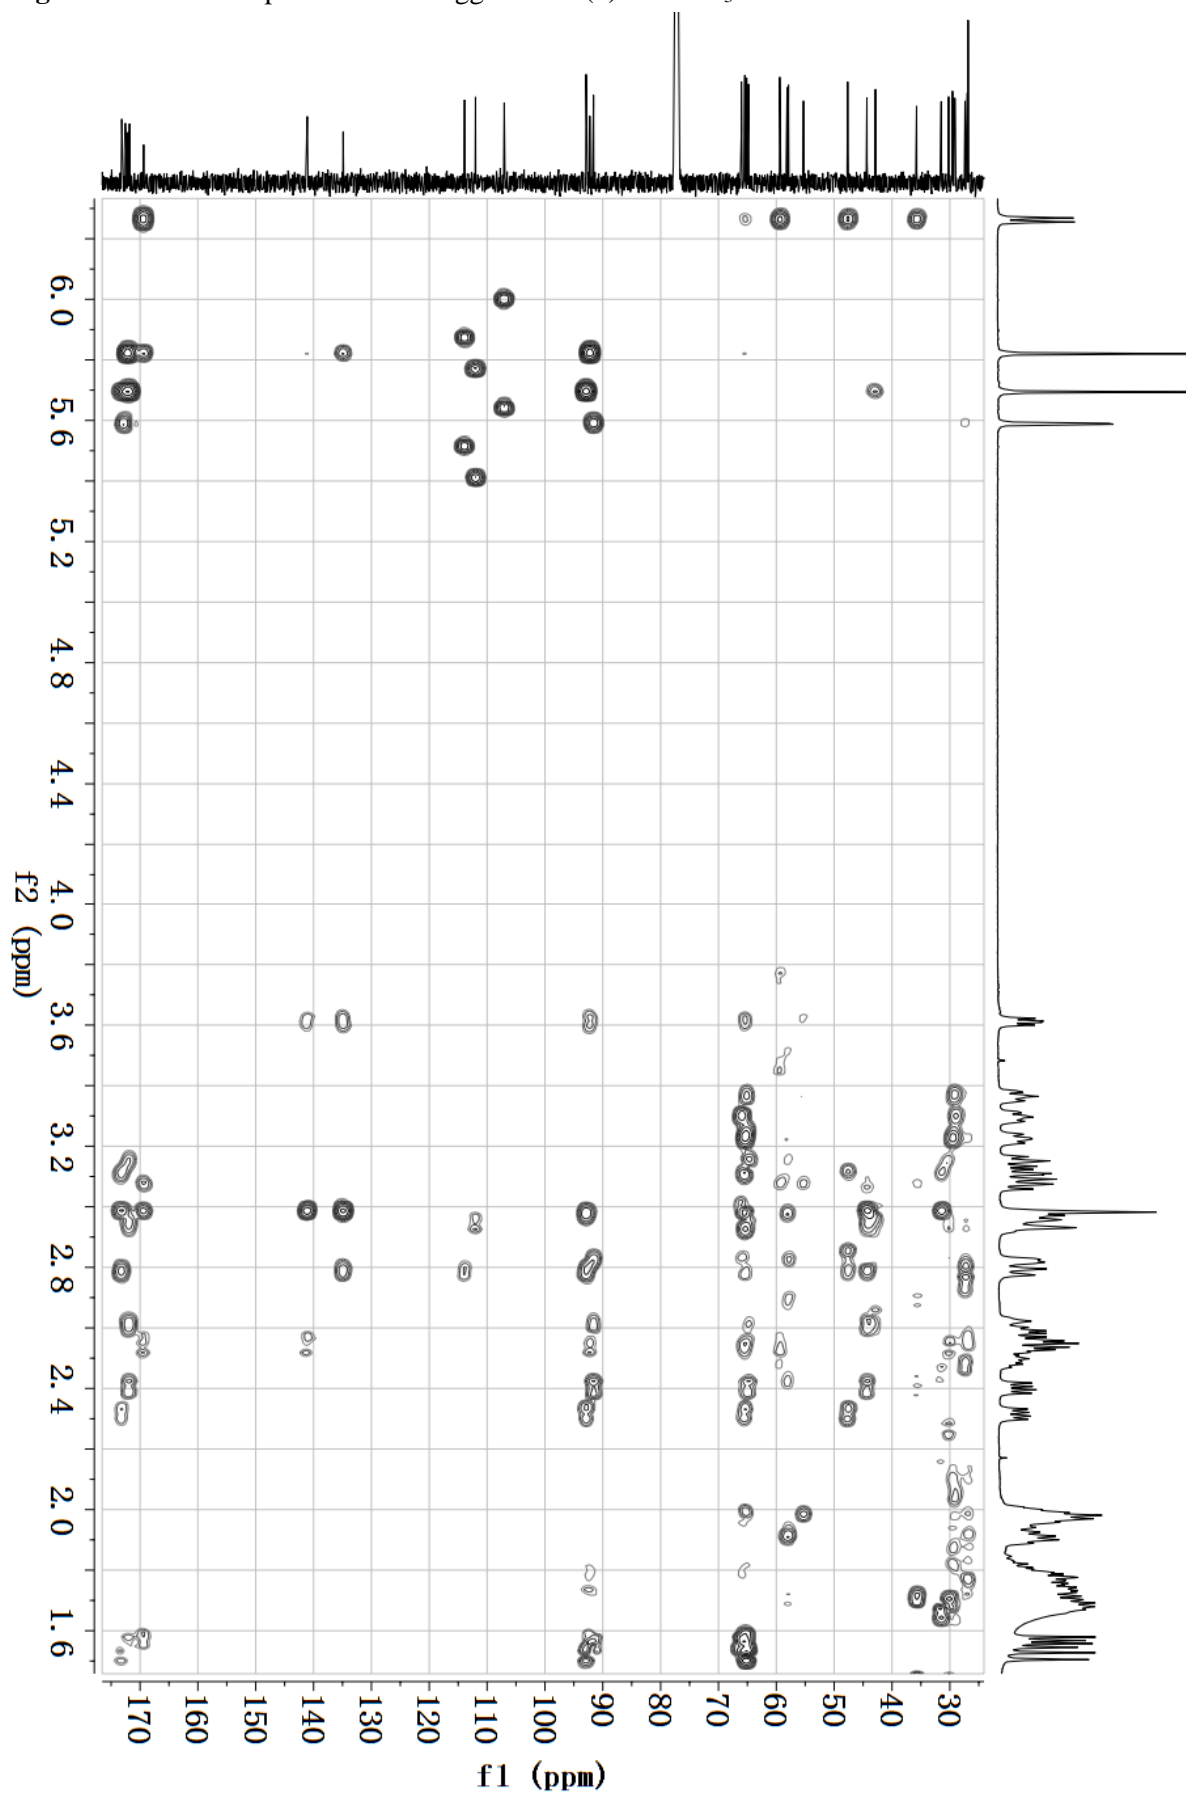



Figure S78. ROESY spectrum for flueggeine H (9) in CDCl<sub>3</sub>.

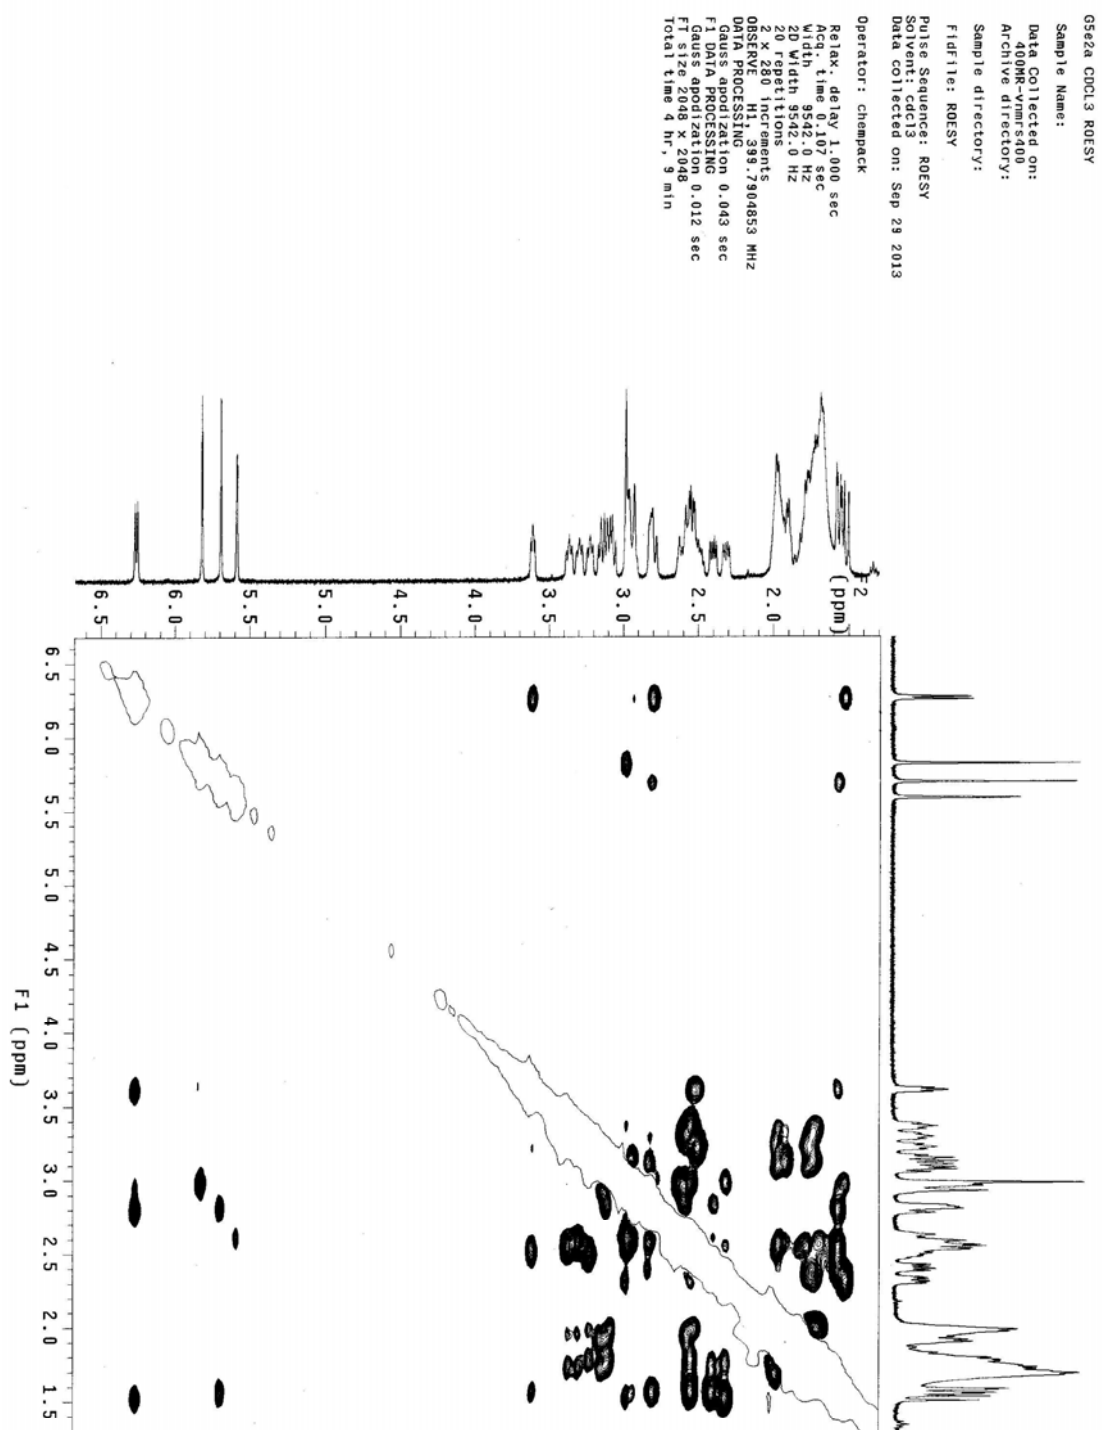

Figure S79. IR spectrum for flueggenine H (9).

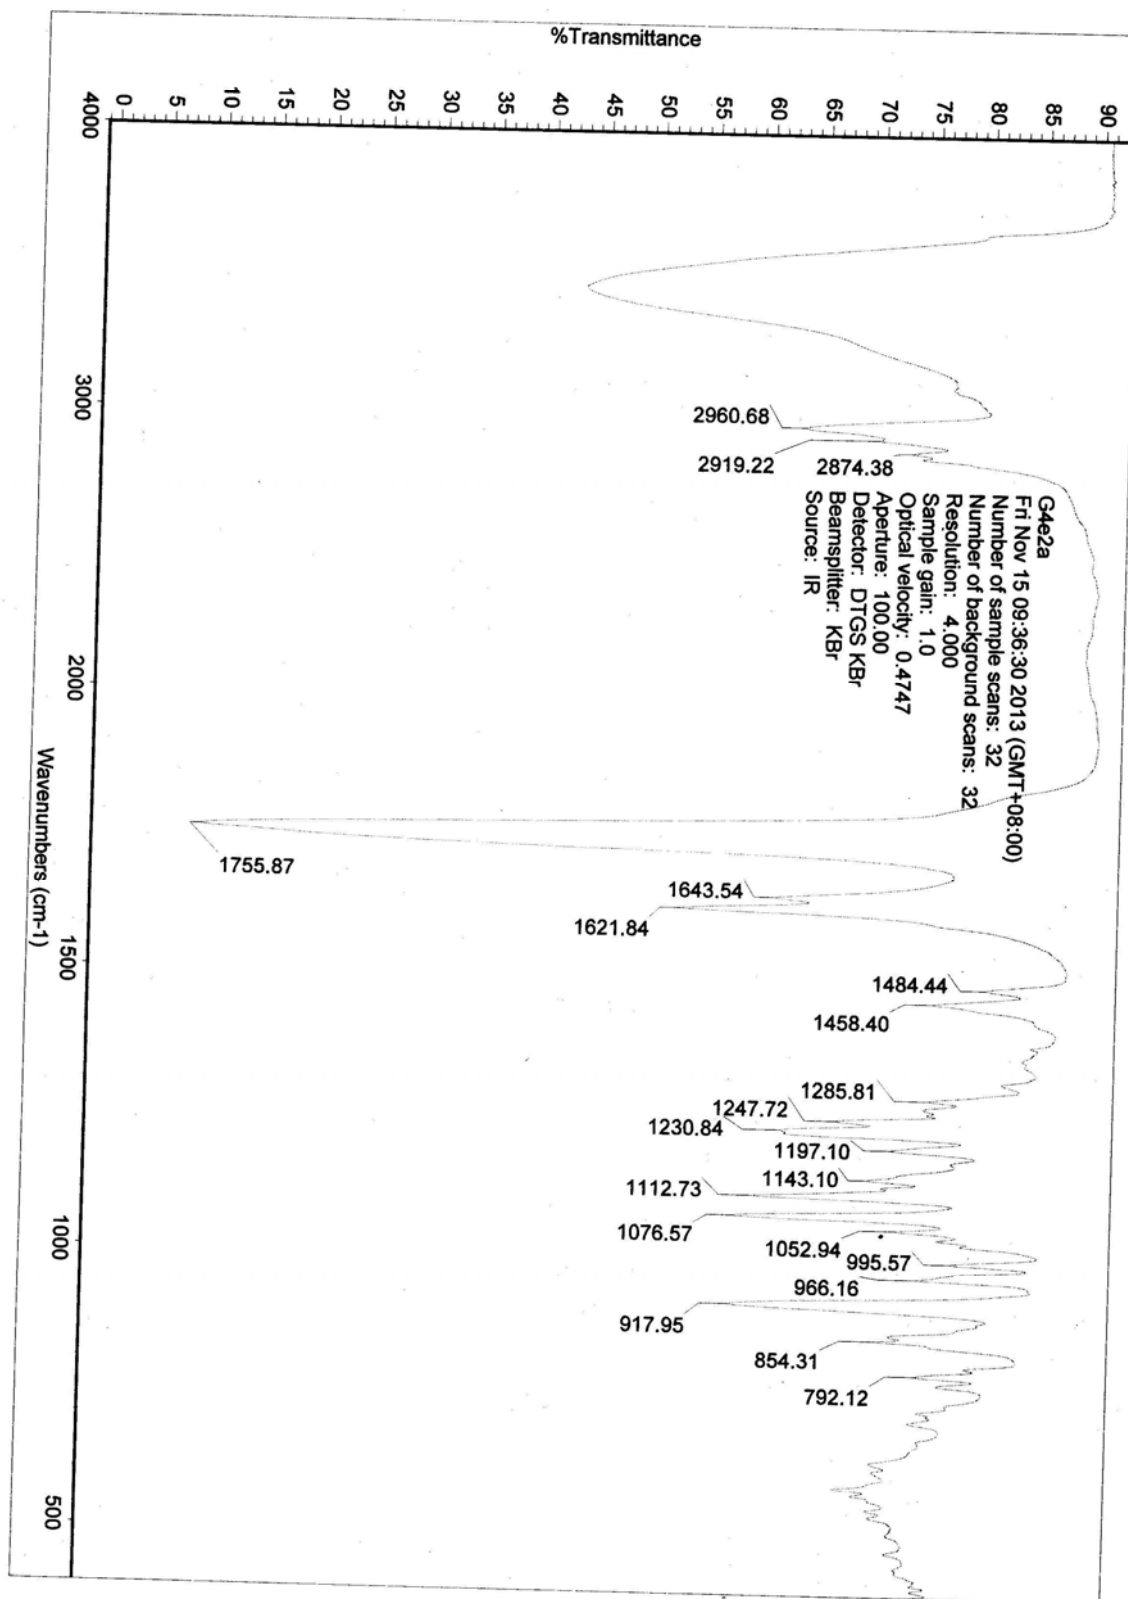

Figure S80. (+)-ESIMS spectrum for flueggeine H (9).

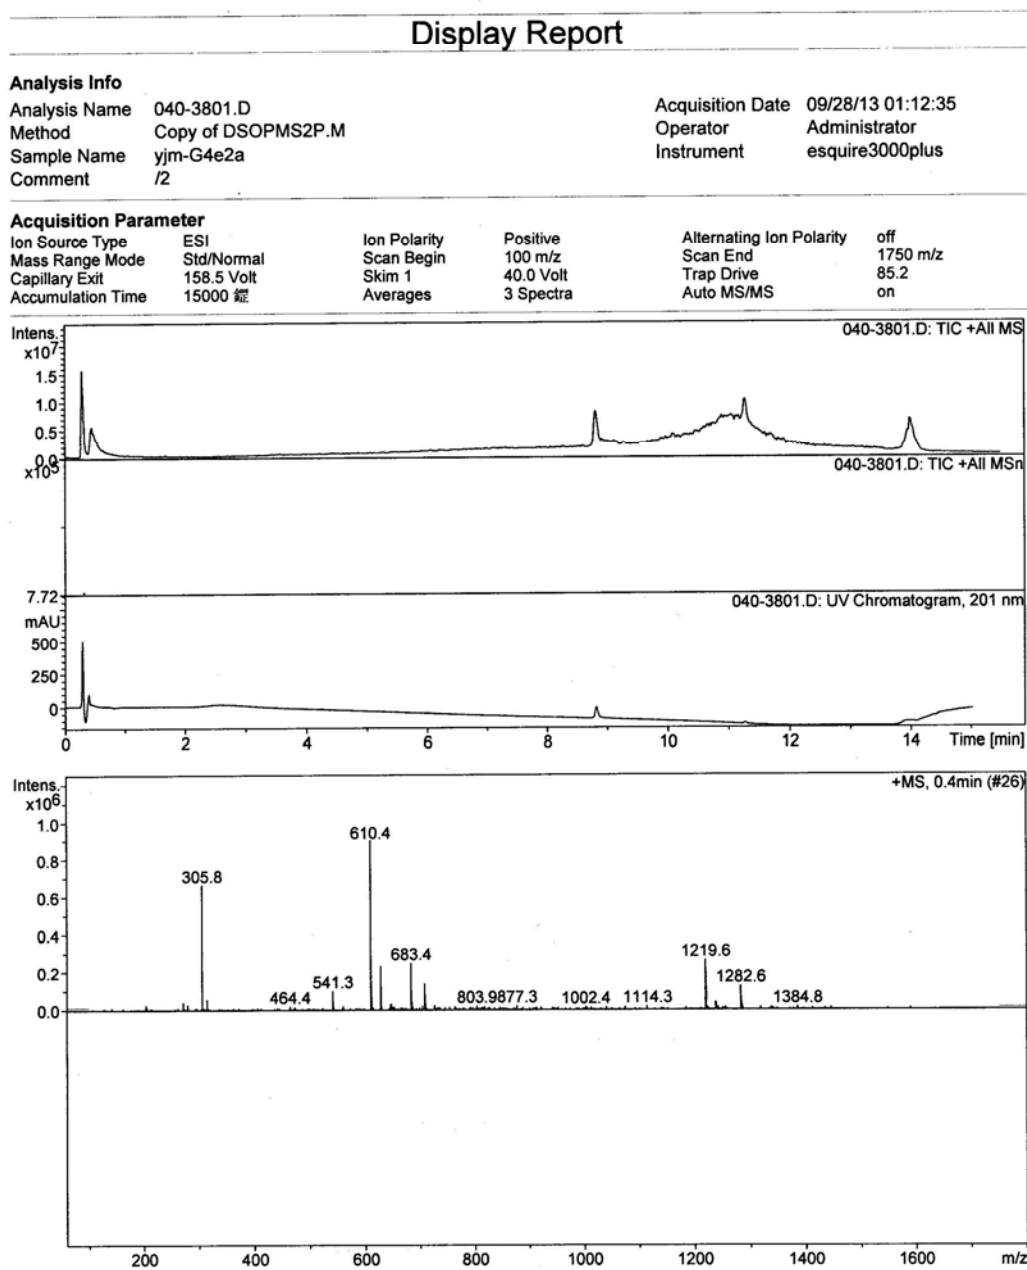

**Figure S81.** (+)-HRESIMS spectrum for fluegenine H (**9**).

**Elemental Composition Report**

**Single Mass Analysis**

Tolerance = 5.0 PPM / DBE: min = -1.5, max = 50.0

Element prediction: Off

Number of isotope peaks used for i-FIT = 3

Monoisotopic Mass, Even Electron Ions

628 formula(e) evaluated with 2 results within limits (up to 50 closest results for each mass)

Elements Used:

C: 5-80 H: 2-120 N: 0-4 O: 0-20

G4ge2a

LCT PXE KE324

27-Sep-2013

10:18:25

1: TOF MS ES+

3.45e+004

G4e2a\_0927 31 (0.670) AM2 (Ar,11000.0,0.00,0.70); ABS; Cm (13:32)

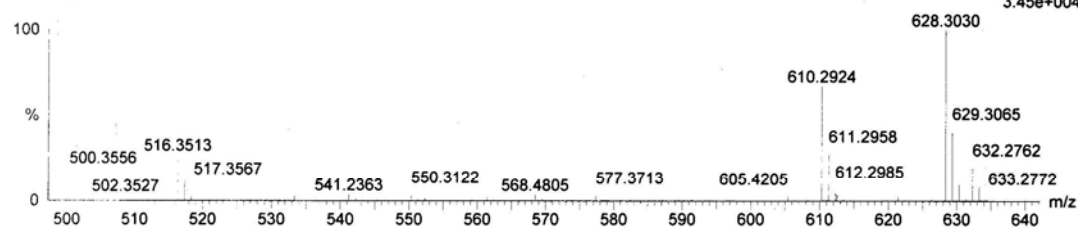

Minimum: -1.5  
Maximum: 3.0 5.0 50.0

| Mass     | Calc. Mass | mDa | PPM | DBE  | i-FIT | i-FIT (Norm) | Formula         |
|----------|------------|-----|-----|------|-------|--------------|-----------------|
| 610.2924 | 610.2922   | 0.2 | 0.3 | 0.5  | 145.6 | 7.5          | C23 H48 N O17   |
|          | 610.2917   | 0.7 | 1.1 | 18.5 | 138.1 | 0.0          | C36 H40 N3 O6 ✓ |



Figure S83.  $^{13}\text{C}$  NMR spectrum for flueggein I (**10**) in  $\text{CDCl}_3$ .

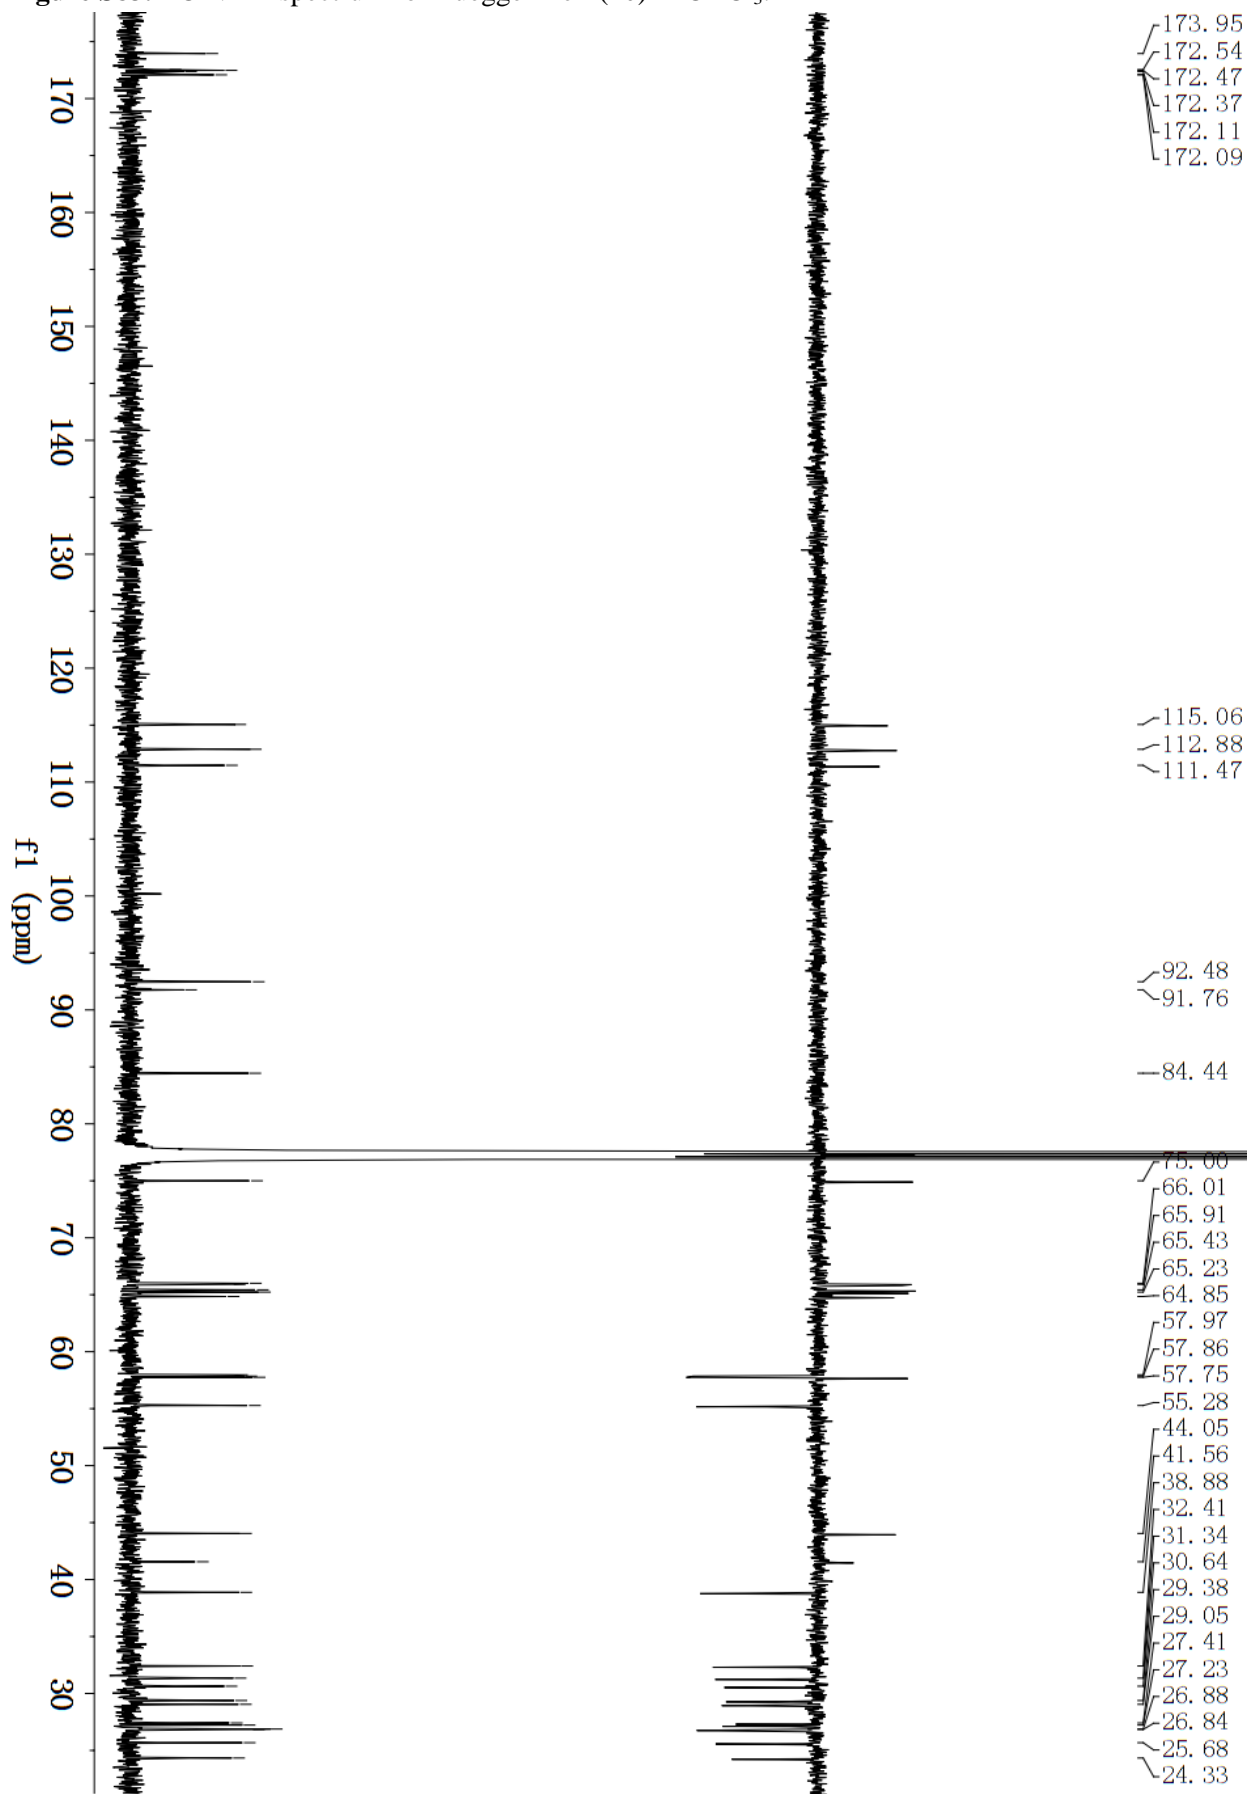



Figure S85. HSQC spectrum for flueggenine I (10) CDCl<sub>3</sub>.

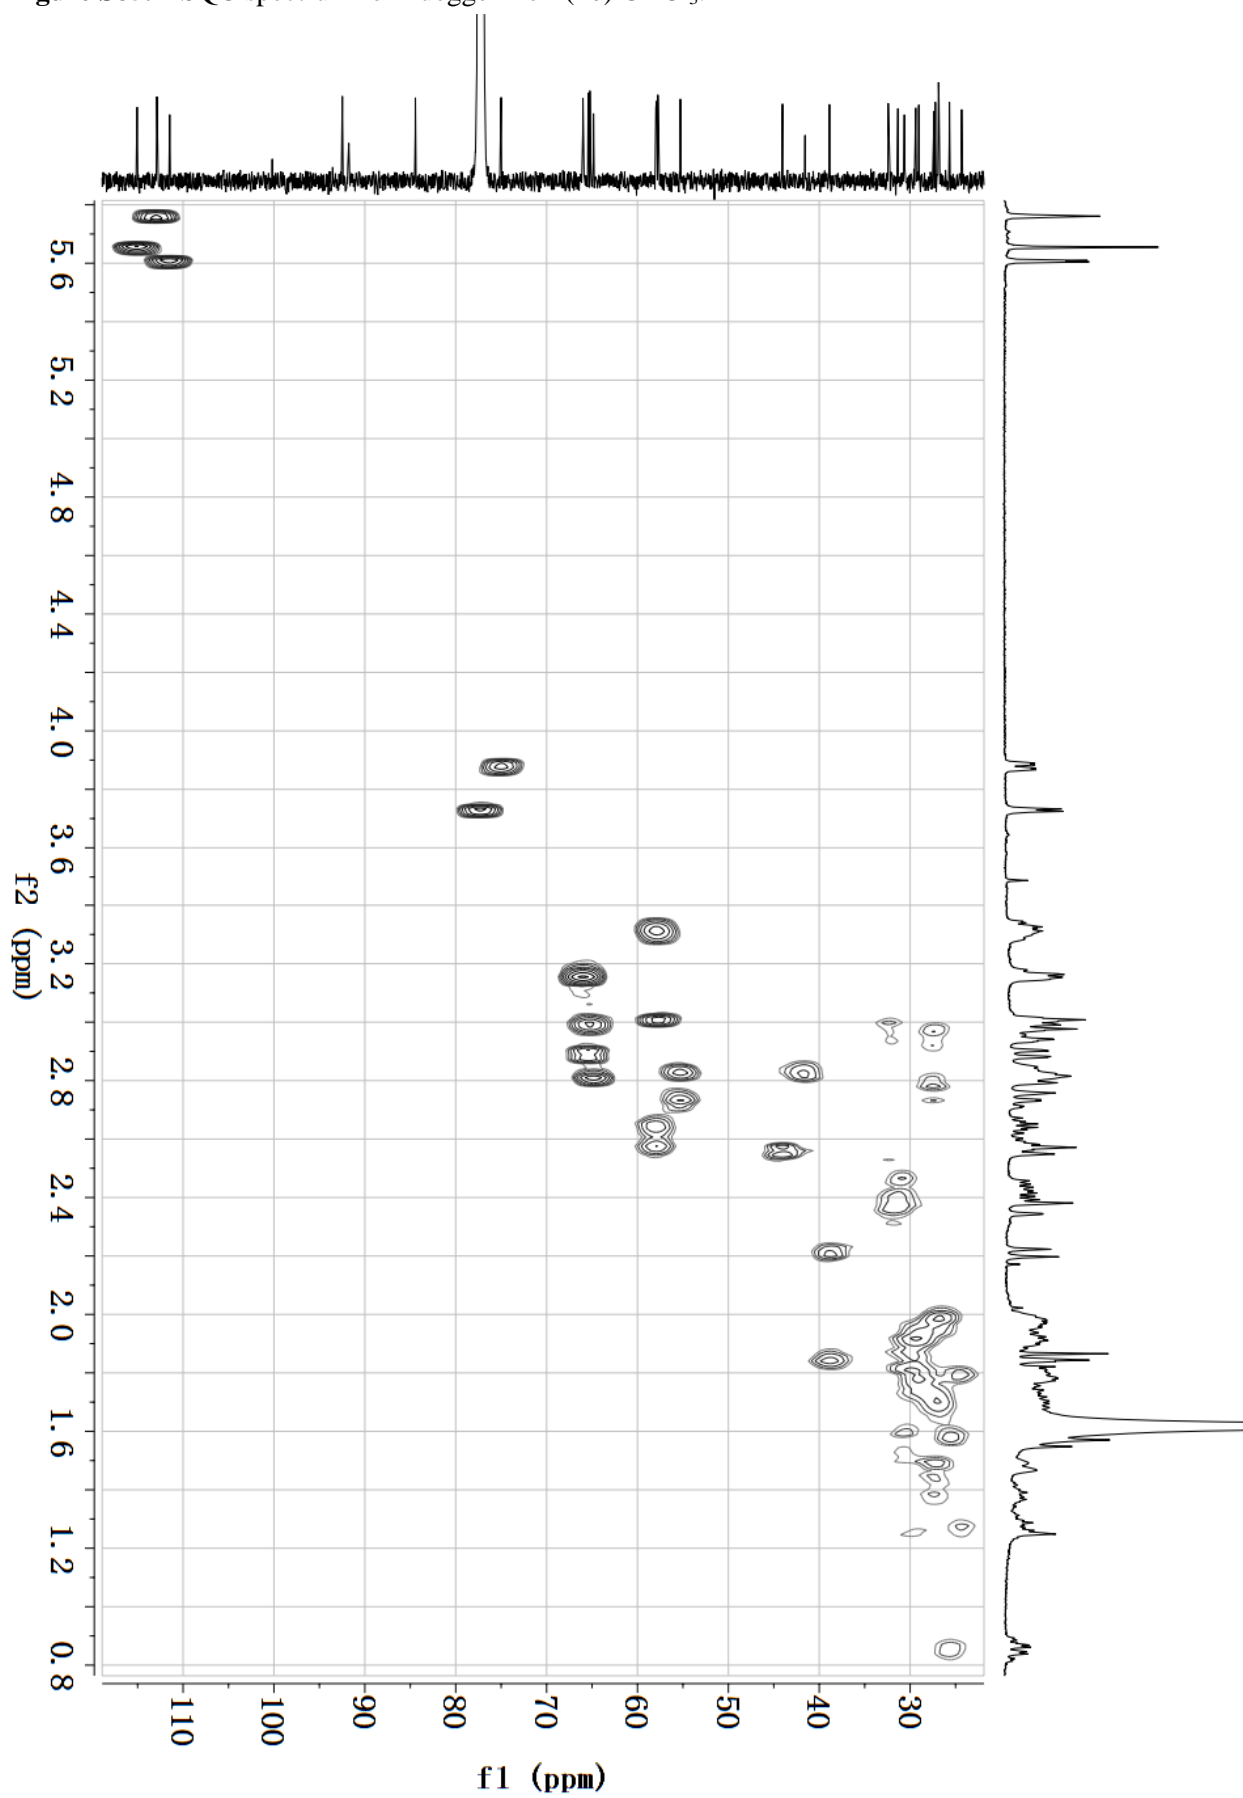



Figure S86. HMBC spectrum for flueggeine I (10) in CDCl<sub>3</sub>.

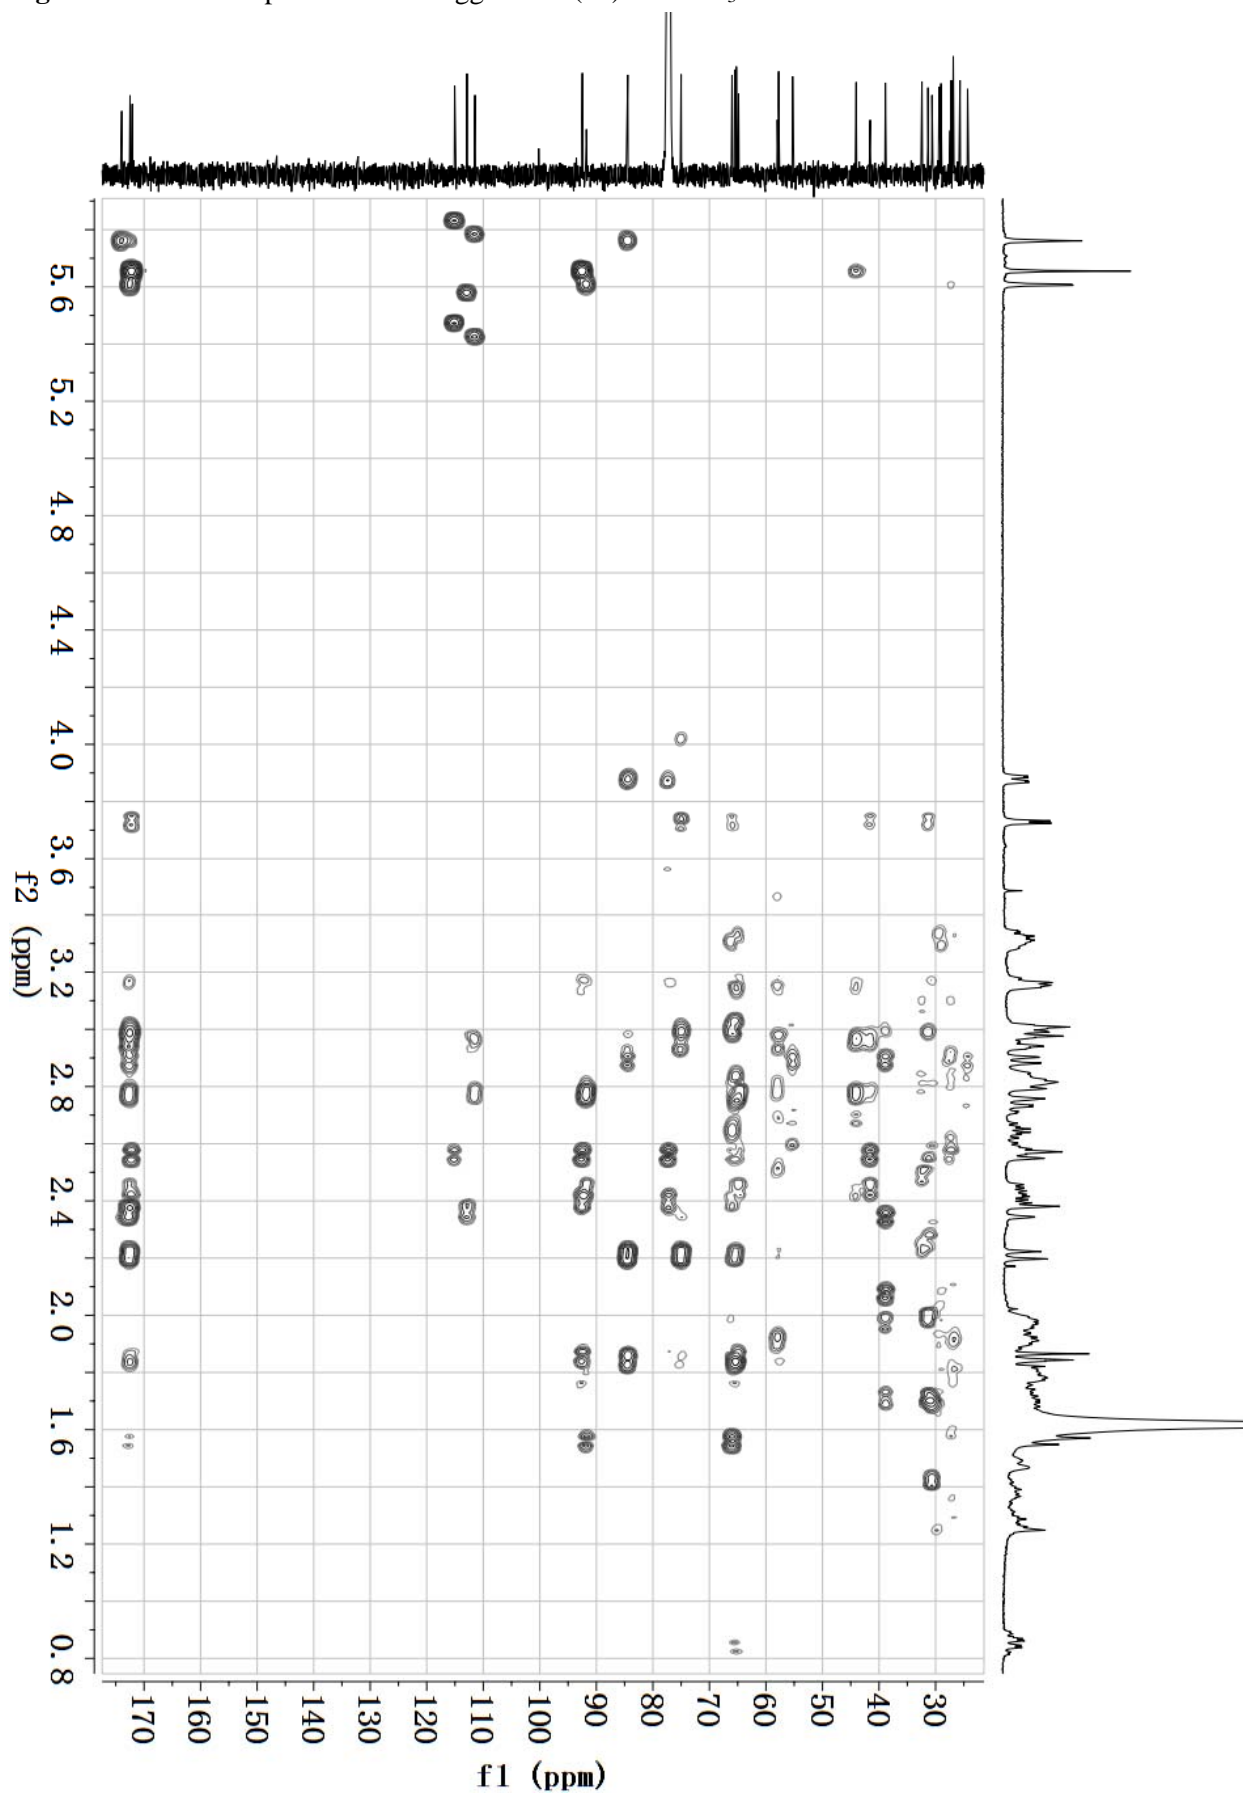

Figure S87. ROESY spectrum for flueggein I (10) in CDCl<sub>3</sub>.

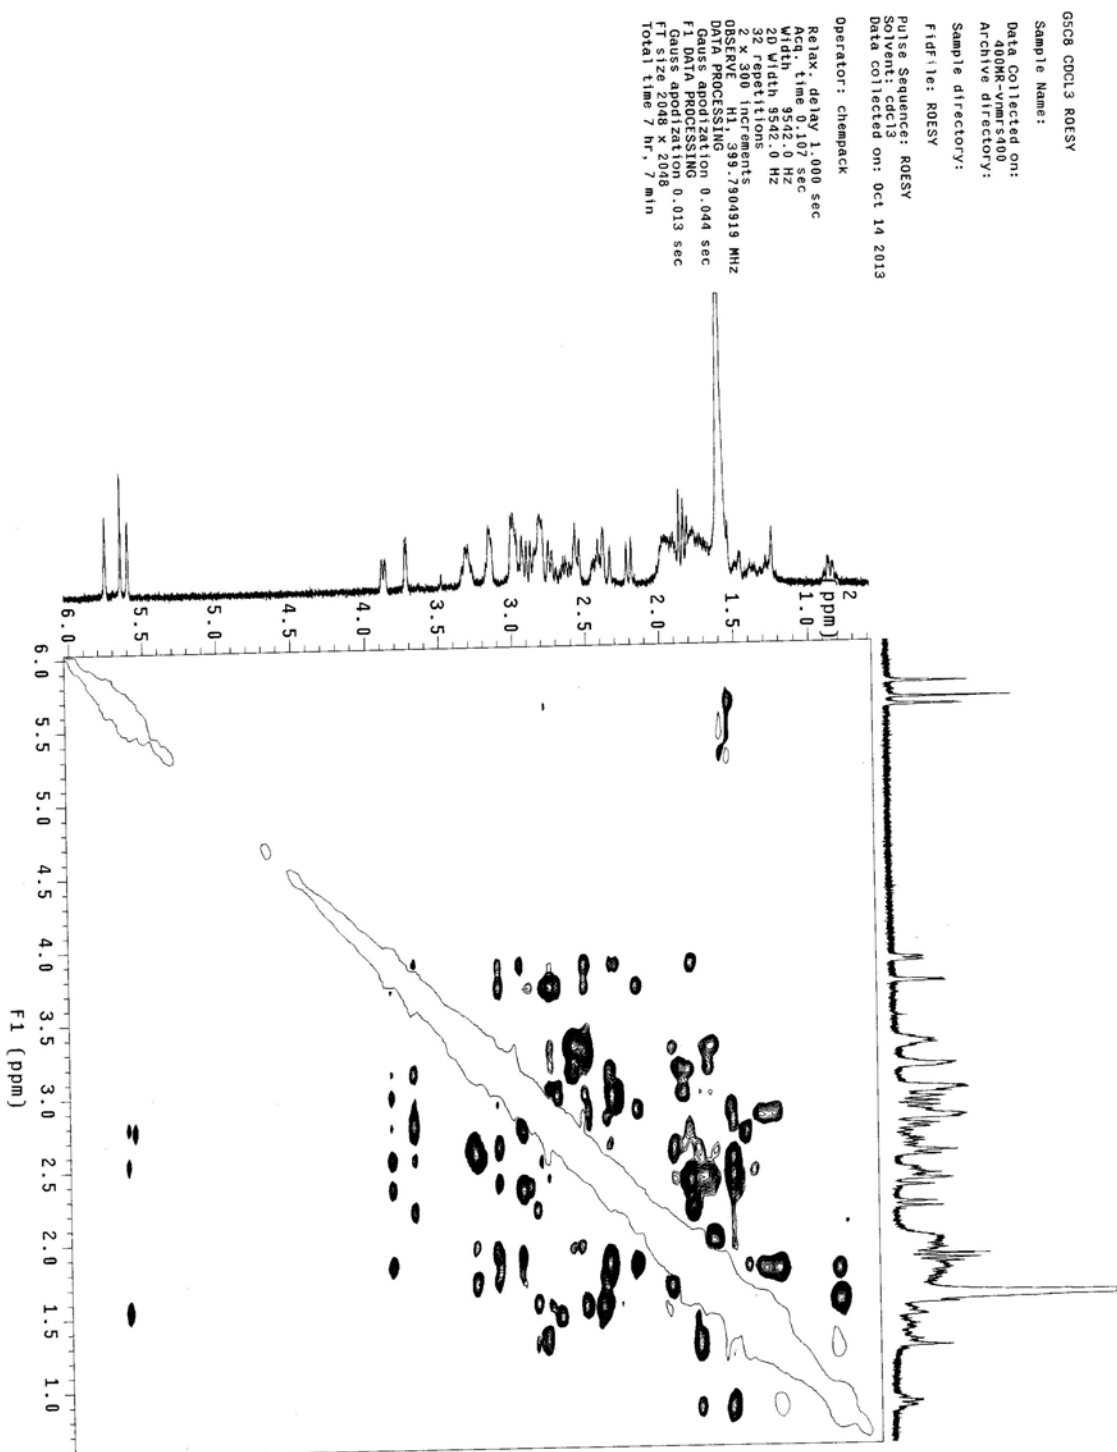

Figure S88. IR spectrum for flueggenine I (10).

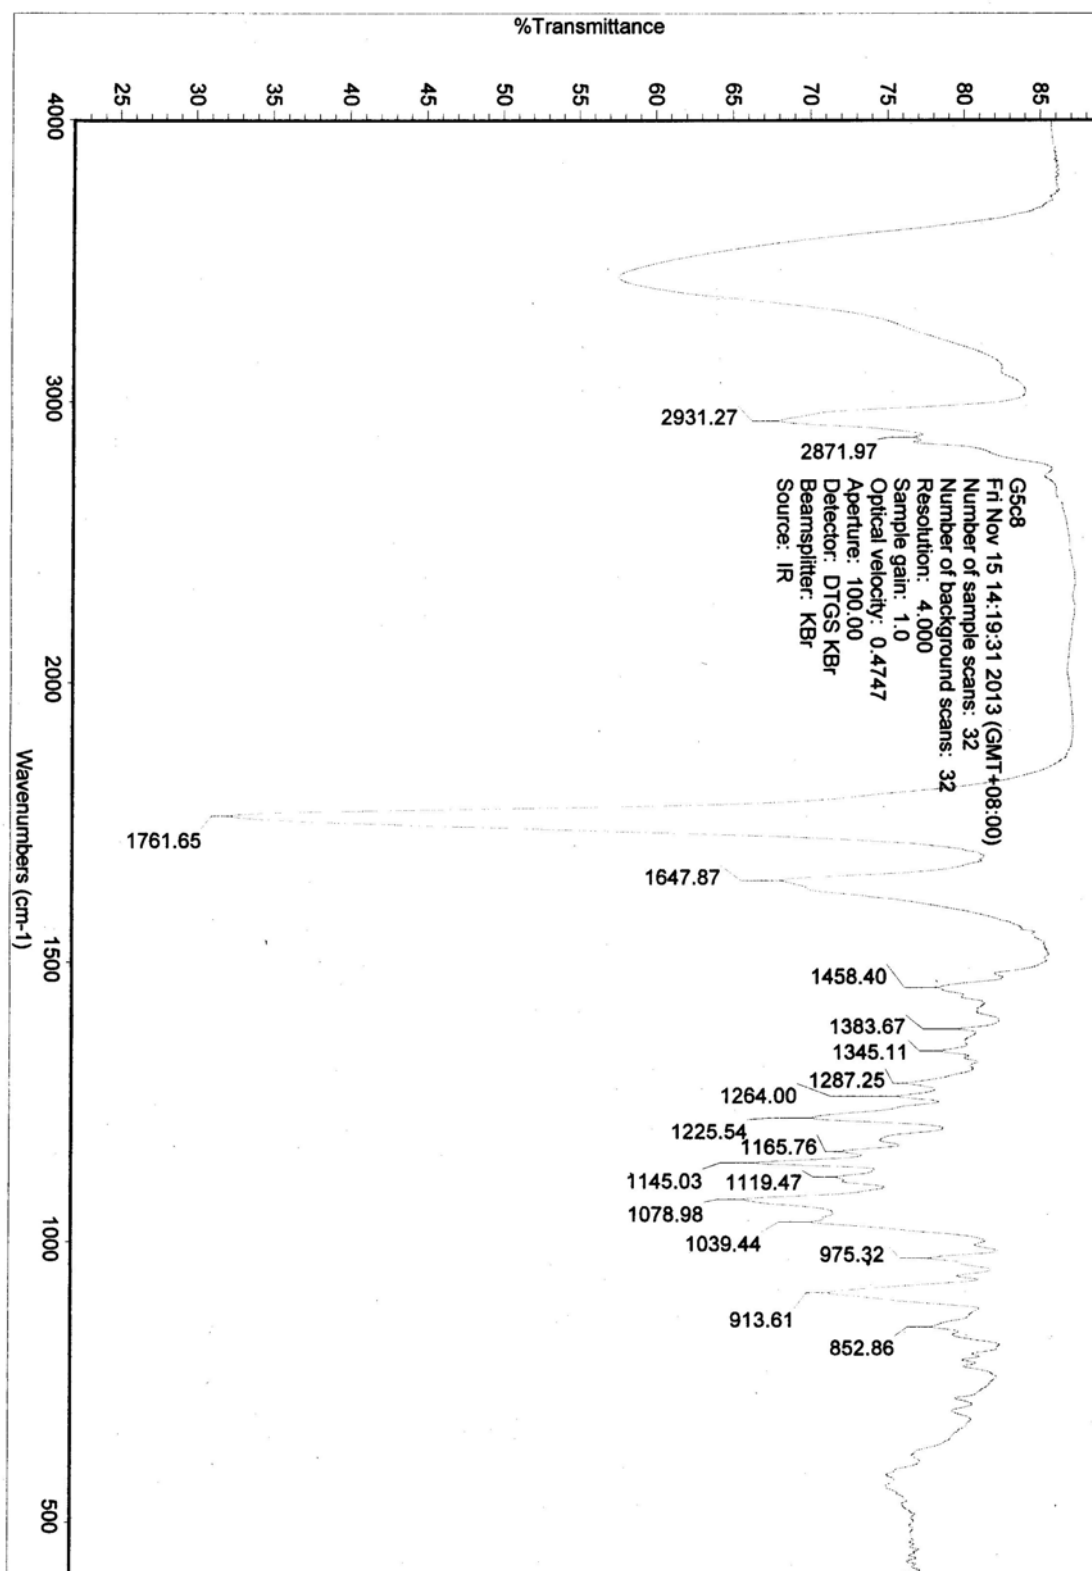

Figure S89. (+)-ESIMS spectrum for flueggein I (10).

### Display Report

#### Analysis Info

Analysis Name 042-8701.D  
Method Copy of DSOPMS2P.M  
Sample Name yjm-G5C8  
Comment 囁

Acquisition Date 10/16/13 08:38:45  
Operator Administrator  
Instrument esquire3000plus

#### Acquisition Parameter

|                   |            |              |           |                          |          |
|-------------------|------------|--------------|-----------|--------------------------|----------|
| Ion Source Type   | ESI        | Ion Polarity | Positive  | Alternating Ion Polarity | off      |
| Mass Range Mode   | Std/Normal | Scan Begin   | 100 m/z   | Scan End                 | 1750 m/z |
| Capillary Exit    | 158.5 Volt | Skim 1       | 40.0 Volt | Trap Drive               | 85.2     |
| Accumulation Time | 15000 經    | Averages     | 3 Spectra | Auto MS/MS               | on       |

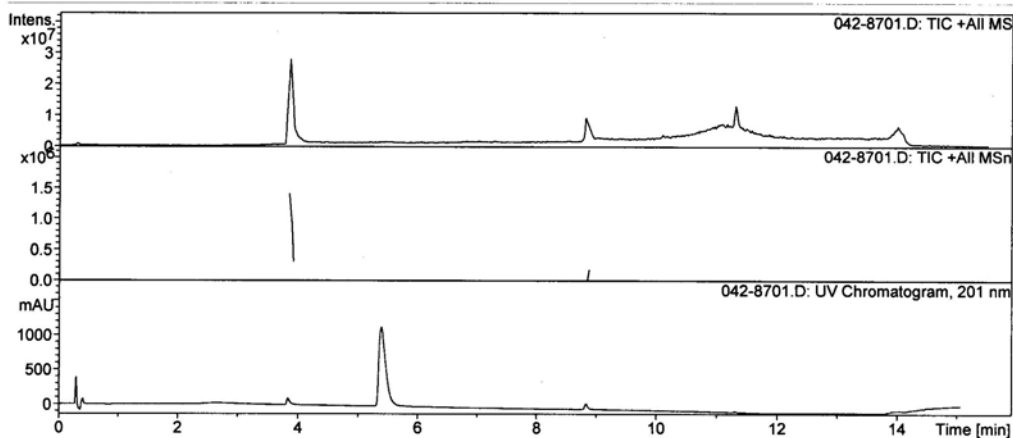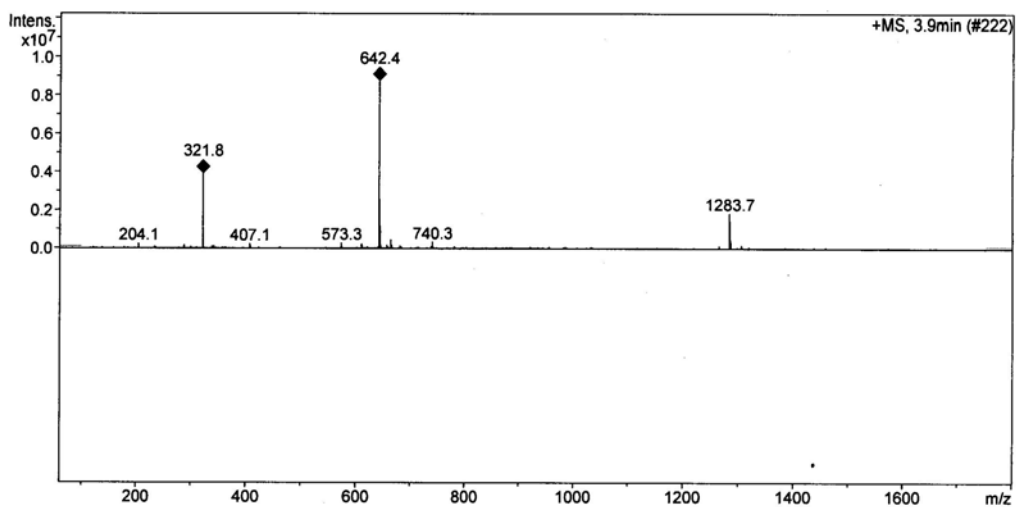

Figure S90. (+)-HRESIMS spectrum for flueggenine I (10).

Elemental Composition Report

Single Mass Analysis

Tolerance = 3.0 PPM / DBE: min = -1.5, max = 50.0

Element prediction: Off

Number of isotope peaks used for i-FIT = 3

Monoisotopic Mass, Even Electron Ions

668 formula(e) evaluated with 2 results within limits (up to 50 closest results for each mass)

Elements Used:

C: 5-80 H: 2-120 N: 0-4 O: 0-20

GEC8

LCT PXE KE324

12-May-2015

14:18:17

1: TOF MS ES+

1.82e+004

GEC8\_0512 39 (0.847) AM2 (Ar,10000.0,0.00,1.00); ABS; Cm (29:43)

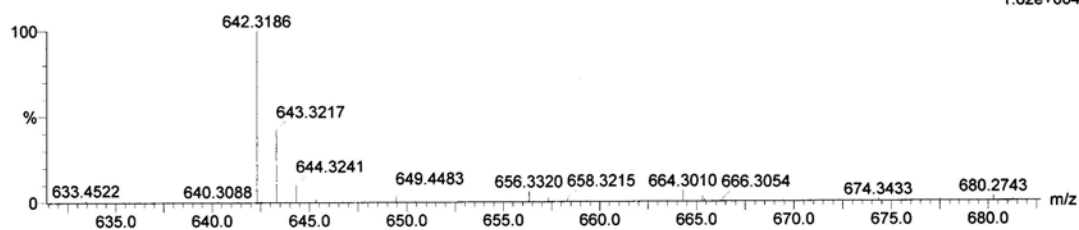

Minimum: -1.5  
Maximum: 50.0

| Mass     | Calc. Mass | mDa | PPM | DBE  | i-FIT | i-FIT (Norm) | Formula       |
|----------|------------|-----|-----|------|-------|--------------|---------------|
| 642.3186 | 642.3184   | 0.2 | 0.3 | -0.5 | 101.6 | 8.5          | C24 H52 N O18 |
|          | 642.3179   | 0.7 | 1.1 | 17.5 | 93.1  | 0.0          | C37 H44 N3 O7 |
